# Supplementary material for: The expected oddball: effects of implicit and explicit positional expectation on duration perception
Source: Springer Nature journal article supplement (doi:10.1007/s00426-018-1093-5), 2018-09-12
Supplement: MOESM1 [file 16120394]

Subject	TTime	Response	Type	Interval	TypeN1	Experiment
10	376.2	longer	Short	516.6	Short	Oddball
10	522.1	longer	Short	483.3	Short	Oddball
10	238.5	longer	Short	675	Short	Oddball
10	104	longer	Short	633.3	Short	Oddball
10	243.3	longer	Long	683.3	Short	Oddball
10	1035.1	shorter	Short	466.6	Long	Oddball
10	368.3	shorter	Long	300	Short	Oddball
10	559.8	longer	Short	350	Long	Oddball
10	312	shorter	Short	341.6	Short	Oddball
10	708.6	shorter	Long	441.6	Short	Oddball
10	191.8	longer	Long	675	Long	Oddball
10	187.1	longer	Long	591.7	Long	Oddball
10	868.2	shorter	Short	491.6	Long	Oddball
10	438.1	shorter	Long	350	Short	Oddball
10	597	longer	Long	458.3	Long	Oddball
10	40.3	longer	Long	591.7	Long	Oddball
10	504.9	longer	Long	608.3	Long	Oddball
10	418.5	shorter	Long	325	Long	Oddball
10	295.1	shorter	Long	333.3	Long	Oddball
10	294.9	longer	Short	616.7	Long	Oddball
10	124.9	longer	Long	625	Short	Oddball
10	320.1	shorter	Short	300	Long	Oddball
10	177	longer	Long	525	Short	Oddball
10	250.2	shorter	Short	300	Long	Oddball
10	313.8	longer	Long	625	Short	Oddball
10	280.3	longer	Short	633.3	Long	Oddball
10	219.9	shorter	Long	300	Short	Oddball
10	284.5	longer	Long	633.3	Long	Oddball
10	841.4	shorter	Short	300	Long	Oddball
10	1283.9	longer	Long	358.3	Short	Oddball
10	424.3	shorter	Short	508.3	Long	Oddball
10	420.2	shorter	Long	541.7	Short	Oddball
10	440.4	shorter	Short	383.3	Long	Oddball
10	128.5	longer	Short	458.3	Short	Oddball
10	263.7	shorter	Short	400	Short	Oddball
10	353.6	longer	Short	400	Short	Oddball
10	161.1	shorter	Short	366.6	Short	Oddball
10	153.7	longer	Long	491.6	Short	Oddball
10	6031.8	longer	Long	558.3	Long	Oddball
10	187.5	longer	Long	533.3	Long	Oddball
10	1057.1	longer	Long	341.6	Long	Oddball
10	385.8	shorter	Short	475	Long	Oddball
10	163	longer	Short	691.7	Short	Oddball
10	349.5	shorter	Short	483.3	Short	Oddball
10	369	longer	Short	466.6	Short	Oddball
10	229.5	shorter	Short	425	Short	Oddball
10	287.4	shorter	Long	391.6	Short	Oddball
10	150.7	longer	Long	600	Long	Oddball
10	236.2	longer	Short	616.7	Long	Oddball
10	54.8	longer	Long	566.7	Short	Oddball
10	167.1	longer	Long	608.3	Long	Oddball
10	51.6	longer	Short	625	Long	Oddball
10	303.5	shorter	Long	316.6	Short	Oddball
10	214.5	shorter	Long	391.6	Long	Oddball
10	231.6	longer	Short	666.7	Long	Oddball
10	22.2	longer	Long	675	Short	Oddball
10	2191.3	longer	Short	658.3	Long	Oddball
10	498.1	shorter	Long	400	Short	Oddball
10	143.3	longer	Long	441.6	Long	Oddball
10	265	longer	Long	483.3	Long	Oddball
10	435.1	shorter	Short	591.7	Long	Oddball
10	1396.3	longer	Long	600	Short	Oddball
10	107.5	longer	Long	491.6	Long	Oddball
10	397.7	shorter	Short	541.7	Long	Oddball
10	387.2	longer	Long	533.3	Short	Oddball
10	81.1	longer	Short	575	Long	Oddball
10	138.6	longer	Short	591.7	Short	Oddball
10	347.9	longer	Long	500	Short	Oddball
10	210.5	shorter	Long	358.3	Long	Oddball
10	225.4	longer	Long	683.3	Long	Oddball
10	184	longer	Long	675	Long	Oddball
10	322	shorter	Long	433.3	Long	Oddball
10	108.3	longer	Long	691.7	Long	Oddball
10	258.8	longer	Short	633.3	Long	Oddball
10	91.2	longer	Short	633.3	Short	Oddball
10	191.2	longer	Long	675	Short	Oddball
10	154.3	longer	Short	633.3	Long	Oddball
10	371.9	shorter	Short	316.6	Short	Oddball
10	341.1	shorter	Long	466.6	Short	Oddball
10	247.6	shorter	Short	300	Long	Oddball
10	193	shorter	Long	391.6	Short	Oddball
10	43.5	shorter	Short	450	Long	Oddball
10	87	shorter	Short	375	Short	Oddball
10	307.9	shorter	Short	500	Short	Oddball
10	89.4	shorter	Short	458.3	Short	Oddball
10	147.2	shorter	Short	375	Short	Oddball
10	120.2	shorter	Long	400	Short	Oddball
10	168.8	longer	Long	533.3	Long	Oddball
10	80.3	longer	Short	550	Long	Oddball
10	150.3	shorter	Long	441.6	Short	Oddball
10	160.6	shorter	Long	458.3	Long	Oddball
10	20.2	longer	Long	616.7	Long	Oddball
10	158.4	shorter	Short	633.3	Long	Oddball
10	235.6	shorter	Short	416.6	Short	Oddball
10	161.5	shorter	Short	325	Short	Oddball
10	37.2	longer	Short	650	Short	Oddball
10	234.2	shorter	Short	350	Short	Oddball
10	366.8	shorter	Long	316.6	Short	Oddball
10	40.7	longer	Long	450	Long	Oddball
10	279	longer	Long	666.7	Long	Oddball
10	201.5	shorter	Short	366.6	Long	Oddball
10	1714	longer	Short	691.7	Short	Oddball
10	140.4	shorter	Short	333.3	Short	Oddball
10	169.5	longer	Short	633.3	Short	Oddball
10	163.8	longer	Long	441.6	Short	Oddball
10	935.3	shorter	Short	658.3	Long	Oddball
10	7.2	longer	Long	533.3	Short	Oddball
10	1332.1	longer	Short	691.7	Short	Oddball
10	2045.9	longer	Long	683.3	Short	Oddball
10	124.9	longer	Short	483.3	Long	Oddball
10	1.7	longer	Short	658.3	Short	Oddball
10	183	shorter	Long	333.3	Short	Oddball
10	1366.6	longer	Long	691.7	Long	Oddball
10	185.6	shorter	Short	458.3	Long	Oddball
10	492.2	longer	Short	458.3	Short	Oddball
10	1106.4	shorter	Long	416.6	Short	Oddball
10	148.1	shorter	Short	558.3	Long	Oddball
10	86.1	shorter	Long	475	Short	Oddball
10	1146.4	shorter	Long	475	Long	Oddball
10	91.9	shorter	Long	483.3	Long	Oddball
10	346.2	shorter	Long	416.6	Long	Oddball
10	120.4	longer	Short	608.3	Long	Oddball
10	28.3	longer	Long	650	Short	Oddball
10	29.6	longer	Long	608.3	Long	Oddball
10	355.6	longer	Long	491.6	Long	Oddball
10	105.1	longer	Short	616.7	Long	Oddball
10	363.6	shorter	Short	341.6	Short	Oddball
10	129.1	shorter	Short	408.3	Short	Oddball
10	99	longer	Short	333.3	Short	Oddball
10	347.3	shorter	Long	358.3	Short	Oddball
10	135.6	longer	Long	616.7	Long	Oddball
10	93.9	longer	Long	575	Long	Oddball
10	95.4	longer	Short	575	Long	Oddball
10	233.6	shorter	Short	358.3	Short	Oddball
10	445.2	shorter	Short	483.3	Short	Oddball
10	35.8	longer	Long	658.3	Short	Oddball
10	291.1	longer	Long	450	Long	Oddball
10	146.3	shorter	Short	433.3	Long	Oddball
10	1.6	longer	Long	541.7	Short	Oddball
10	60.3	longer	Long	600	Long	Oddball
10	946.7	longer	Short	683.3	Long	Oddball
10	227.6	shorter	Long	500	Short	Oddball
10	1572.9	shorter	Long	408.3	Long	Oddball
10	179	longer	Long	541.7	Long	Oddball
10	103	longer	Long	591.7	Long	Oddball
10	145.1	shorter	Short	550	Long	Oddball
10	521	shorter	Short	366.6	Short	Oddball
10	346.1	shorter	Short	358.3	Short	Oddball
10	172.7	shorter	Short	300	Short	Oddball
10	66.3	shorter	Long	358.3	Short	Oddball
10	267	shorter	Long	383.3	Long	Oddball
10	261.9	shorter	Long	325	Long	Oddball
10	25.1	longer	Short	566.7	Long	Oddball
10	416.9	shorter	Short	483.3	Short	Oddball
10	150.6	longer	Long	508.3	Short	Oddball
10	173.7	shorter	Short	375	Long	Oddball
10	113.7	longer	Long	591.7	Short	Oddball
10	140.6	shorter	Short	325	Long	Oddball
10	350.7	shorter	Short	508.3	Short	Oddball
10	294.7	shorter	Long	516.6	Short	Oddball
10	315.8	longer	Short	683.3	Long	Oddball
10	1072.5	longer	Long	483.3	Short	Oddball
10	386.6	shorter	Short	383.3	Long	Oddball
10	258.4	shorter	Short	325	Short	Oddball
10	188.6	shorter	Short	391.6	Short	Oddball
10	214.1	longer	Short	683.3	Short	Oddball
10	252	shorter	Long	508.3	Short	Oddball
10	1515.4	longer	Short	666.7	Long	Oddball
10	974.4	longer	Short	508.3	Short	Oddball
10	901.9	longer	Short	541.7	Short	Oddball
10	190.7	shorter	Short	383.3	Short	Oddball
10	157.7	shorter	Long	300	Short	Oddball
10	217.2	shorter	Short	458.3	Long	Oddball
10	163.4	longer	Long	591.7	Short	Oddball
10	368.4	shorter	Long	383.3	Long	Oddball
10	1067.5	shorter	Short	458.3	Long	Oddball
10	91.3	longer	Short	641.7	Short	Oddball
10	113.8	longer	Short	650	Short	Oddball
10	122.4	shorter	Long	341.6	Short	Oddball
10	175.4	longer	Long	625	Long	Oddball
10	358	shorter	Long	325	Long	Oddball
10	165.6	longer	Long	516.6	Long	Oddball
10	222.8	shorter	Short	308.3	Long	Oddball
10	670.8	longer	Long	450	Short	Oddball
10	529.3	longer	Long	533.3	Long	Oddball
10	4.2	longer	Short	508.3	Long	Oddball
10	161.4	shorter	Short	375	Short	Oddball
10	364.2	shorter	Short	475	Short	Oddball
10	144	longer	Short	650	Short	Oddball
10	400.6	longer	Long	508.3	Short	Oddball
10	55.8	longer	Short	525	Long	Oddball
10	53.7	longer	Long	666.7	Short	Oddball
10	248	shorter	Long	358.3	Long	Oddball
10	332.3	longer	Long	516.7	Long	Oddball
10	70.3	longer	Long	683.3	Long	Oddball
10	479.1	shorter	Short	616.7	Long	Oddball
10	54	longer	Long	416.6	Short	Oddball
10	1292.8	longer	Short	683.3	Long	Oddball
10	98.9	longer	Short	658.3	Short	Oddball
10	64.7	longer	Short	658.3	Short	Oddball
10	17	longer	Long	600	Short	Oddball
10	919.6	longer	Long	683.3	Long	Oddball
10	158.2	shorter	Long	383.3	Long	Oddball
10	691.4	longer	Long	575	Long	Oddball
10	320.5	shorter	Short	483.3	Long	Oddball
10	760	longer	Short	600	Short	Oddball
10	135.6	shorter	Long	316.6	Short	Oddball
10	379.9	shorter	Long	425	Long	Oddball
10	203.4	shorter	Short	541.7	Long	Oddball
10	210.3	longer	Long	491.6	Short	Oddball
10	120.6	longer	Long	700	Long	Oddball
10	129.5	shorter	Short	366.6	Long	Oddball
10	617.5	shorter	Long	341.6	Short	Oddball
10	884.9	shorter	Short	400	Long	Oddball
10	668.8	longer	Long	583.3	Short	Oddball
10	264.4	shorter	Long	508.3	Long	Oddball
10	894.1	longer	Long	600	Long	Oddball
10	127	shorter	Long	350	Long	Oddball
10	494.8	longer	Short	583.3	Long	Oddball
10	206.4	shorter	Long	383.3	Short	Oddball
10	46.7	longer	Long	658.3	Long	Oddball
10	62.2	longer	Short	675	Long	Oddball
10	559.7	shorter	Short	608.3	Short	Oddball
10	1300.9	longer	Long	375	Short	Oddball
10	182.2	shorter	Long	333.3	Long	Oddball
10	108.8	longer	Long	516.6	Long	Oddball
10	249.6	longer	Short	675	Long	Oddball
10	813.7	longer	Short	550	Short	Oddball
10	145.7	shorter	Long	358.3	Short	Oddball
10	772.3	shorter	Long	458.3	Long	Oddball
10	139.2	shorter	Long	325	Long	Oddball
10	178.7	longer	Short	583.3	Long	Oddball
10	294.5	shorter	Short	433.3	Short	Oddball
10	126.7	longer	Short	608.3	Short	Oddball
10	97.6	shorter	Short	308.3	Short	Oddball
10	177.1	shorter	Short	425	Short	Oddball
10	54.9	longer	Short	583.3	Short	Oddball
10	255.9	shorter	Long	391.6	Short	Oddball
10	163.7	shorter	Short	558.3	Long	Oddball
10	100.7	longer	Long	683.3	Short	Oddball
10	463	longer	Long	508.3	Long	Oddball
10	47.8	longer	Short	625	Long	Oddball
10	358.4	shorter	Long	458.3	Short	Oddball
10	87	longer	Long	491.6	Long	Oddball
10	30.2	longer	Short	641.7	Long	Oddball
10	173.1	shorter	Short	308.3	Short	Oddball
10	483.4	shorter	Long	341.6	Short	Oddball
10	799.9	shorter	Short	308.3	Long	Oddball
10	201.4	longer	Long	625	Short	Oddball
10	118.6	longer	Short	575	Long	Oddball
10	387.1	shorter	Short	475	Short	Oddball
10	602.7	longer	Long	691.7	Short	Oddball
10	139.8	longer	Short	675	Long	Oddball
10	148.3	shorter	Short	358.3	Short	Oddball
10	282.8	shorter	Short	400	Short	Oddball
10	324.4	shorter	Short	383.3	Short	Oddball
10	198.9	longer	Long	675	Short	Oddball
10	125.9	longer	Long	691.7	Long	Oddball
10	272.4	shorter	Short	316.6	Long	Oddball
10	1255.5	longer	Short	458.3	Short	Oddball
10	198.4	longer	Long	641.7	Short	Oddball
10	88.5	longer	Short	658.3	Long	Oddball
10	176.5	shorter	Long	383.3	Short	Oddball
10	357.5	shorter	Long	366.6	Long	Oddball
10	68.6	shorter	Long	433.3	Long	Oddball
10	169.6	shorter	Long	675	Long	Oddball
10	1607.8	longer	Long	541.7	Long	Oddball
10	70.3	longer	Long	491.6	Long	Oddball
10	133.8	longer	Short	650	Long	Oddball
10	415.6	shorter	Short	525	Short	Oddball
10	670.7	shorter	Short	466.6	Short	Oddball
10	1258.9	longer	Long	691.7	Short	Oddball
10	645.7	longer	Long	533.3	Long	Oddball
10	326.5	shorter	Short	441.6	Long	Oddball
10	278.8	shorter	Long	533.3	Short	Oddball
10	783.6	shorter	Short	608.3	Long	Oddball
10	66.2	longer	Long	616.7	Short	Oddball
10	79.4	longer	Long	666.7	Long	Oddball
10	872.4	longer	Long	566.7	Long	Oddball
10	109.2	longer	Short	516.6	Long	Oddball
10	1638.4	shorter	Long	525	Short	Oddball
10	524.5	longer	Long	475	Long	Oddball
10	683.7	longer	Short	600	Long	Oddball
10	109.4	longer	Short	575	Short	Oddball
10	354.6	longer	Short	466.6	Short	Oddball
10	750.8	longer	Short	450	Short	Oddball
10	117.2	longer	Short	591.7	Short	Oddball
10	187.9	shorter	Long	383.3	Short	Oddball
10	166	shorter	Short	466.6	Long	Oddball
10	41.7	longer	Long	608.3	Short	Oddball
10	159.9	shorter	Short	308.3	Long	Oddball
10	98.5	longer	Long	641.7	Short	Oddball
10	148.7	shorter	Short	358.3	Long	Oddball
10	40.9	longer	Short	650	Short	Oddball
10	162	shorter	Short	433.3	Short	Oddball
10	375.6	longer	Short	408.3	Short	Oddball
10	156.4	shorter	Short	408.3	Short	Oddball
10	299.2	shorter	Short	383.3	Short	Oddball
10	69.5	longer	Long	508.3	Short	Oddball
10	69.2	longer	Long	608.3	Long	Oddball
10	314.4	shorter	Short	308.3	Long	Oddball
10	118.6	shorter	Long	650	Short	Oddball
10	98.8	longer	Short	683.3	Long	Oddball
10	584	longer	Short	475	Short	Oddball
10	1767.8	longer	Long	683.3	Short	Oddball
10	316.6	longer	Long	575	Long	Oddball
10	173.1	shorter	Short	375	Long	Oddball
10	272.4	longer	Long	416.6	Short	Oddball
10	80.3	longer	Long	600	Long	Oddball
10	101.5	longer	Short	700	Long	Oddball
10	1046.8	longer	Long	533.3	Short	Oddball
10	170.7	longer	Long	525	Long	Oddball
10	13.3	longer	Long	633.3	Long	Oddball
10	200.1	shorter	Short	425	Long	Oddball
10	131.4	shorter	Long	383.3	Short	Oddball
10	71.3	longer	Short	683.3	Long	Oddball
10	343.6	longer	Long	591.7	Short	Oddball
10	61.7	shorter	Short	408.3	Long	Oddball
10	259.4	shorter	Long	466.6	Short	Oddball
10	162.7	shorter	Long	425	Long	Oddball
10	353.3	shorter	Long	341.6	Long	Oddball
10	11.9	longer	Long	650	Long	Oddball
10	220.4	shorter	Short	483.3	Long	Oddball
10	196.4	shorter	Long	450	Short	Oddball
11	309.9	longer	Long	633.3	Short	Oddball
11	1238.4	shorter	Short	383.3	Long	Oddball
11	452.9	longer	Short	508.3	Short	Oddball
11	324.4	longer	Short	666.7	Short	Oddball
11	3736.8	shorter	Short	466.6	Short	Oddball
11	384.4	longer	Short	375	Short	Oddball
11	496.9	shorter	Short	508.3	Short	Oddball
11	3852.9	shorter	Long	475	Short	Oddball
11	762.7	longer	Short	700	Long	Oddball
11	406.3	longer	Long	616.7	Short	Oddball
11	3796.8	longer	Short	541.6	Long	Oddball
11	1019.2	shorter	Long	308.3	Short	Oddball
11	789.8	shorter	Long	383.3	Long	Oddball
11	2055.1	longer	Long	650	Long	Oddball
11	1424.7	shorter	Short	408.3	Long	Oddball
11	644.5	shorter	Short	383.3	Short	Oddball
11	1018.7	longer	Short	508.3	Short	Oddball
11	572.2	longer	Short	450	Short	Oddball
11	2628.5	longer	Long	491.6	Short	Oddball
11	2238.4	shorter	Short	425	Long	Oddball
11	744	shorter	Long	391.6	Short	Oddball
11	4495.8	longer	Long	525	Long	Oddball
11	387.8	longer	Long	666.7	Long	Oddball
11	400.5	shorter	Long	366.6	Long	Oddball
11	1429	shorter	Short	391.6	Long	Oddball
11	824.6	longer	Long	550	Short	Oddball
11	5678.6	shorter	Short	325	Long	Oddball
11	704	longer	Short	583.3	Short	Oddball
11	755.3	longer	Long	683.3	Short	Oddball
11	385.6	longer	Long	558.3	Long	Oddball
11	1597.2	longer	Long	591.7	Long	Oddball
11	3319.6	longer	Short	450	Long	Oddball
11	1072.2	shorter	Short	366.6	Short	Oddball
11	1197.7	shorter	Short	300	Short	Oddball
11	2975.2	longer	Long	633.3	Short	Oddball
11	707.2	shorter	Short	425	Long	Oddball
11	1714	shorter	Short	425	Short	Oddball
11	308.9	longer	Long	683.3	Short	Oddball
11	684.9	shorter	Long	358.3	Long	Oddball
11	86.2	longer	Long	550	Long	Oddball
11	191.8	shorter	Short	383.3	Long	Oddball
11	271.8	longer	Long	675	Short	Oddball
11	317	shorter	Short	308.3	Long	Oddball
11	230.1	longer	Long	525	Short	Oddball
11	268.1	longer	Long	691.7	Long	Oddball
11	570.6	longer	Short	675	Long	Oddball
11	3140.9	shorter	Long	441.6	Short	Oddball
11	393.9	shorter	Short	433.3	Long	Oddball
11	715.9	longer	Long	425	Short	Oddball
11	1855.5	shorter	Long	458.3	Long	Oddball
11	994.4	shorter	Long	341.6	Long	Oddball
11	1067.5	longer	Short	483.3	Long	Oddball
11	1632.3	shorter	Short	516.6	Short	Oddball
11	322.7	longer	Long	633.3	Long	Oddball
11	1627.1	longer	Long	541.7	Long	Oddball
11	543.2	shorter	Short	375	Long	Oddball
11	49.5	longer	Long	666.7	Short	Oddball
11	302.1	shorter	Short	341.6	Long	Oddball
11	2672.1	shorter	Long	516.7	Short	Oddball
11	425.9	shorter	Long	350	Long	Oddball
11	28.1	longer	Short	625	Long	Oddball
11	795.6	shorter	Short	491.6	Short	Oddball
11	183.4	longer	Short	616.7	Short	Oddball
11	373.7	shorter	Short	566.7	Short	Oddball
11	1302.3	shorter	Long	475	Short	Oddball
11	780.8	shorter	Short	441.6	Long	Oddball
11	4589.5	longer	Short	508.3	Short	Oddball
11	300.5	shorter	Long	300	Short	Oddball
11	1081.5	longer	Long	441.6	Long	Oddball
11	240.7	shorter	Short	450	Long	Oddball
11	832.9	longer	Short	658.3	Short	Oddball
11	310	shorter	Short	341.6	Short	Oddball
11	323.9	longer	Short	450	Short	Oddball
11	309.3	shorter	Long	308.3	Short	Oddball
11	2072.3	longer	Long	683.3	Long	Oddball
11	1182.1	shorter	Long	450	Long	Oddball
11	1260.8	shorter	Short	508.3	Long	Oddball
11	968.1	shorter	Long	325	Short	Oddball
11	585.8	longer	Long	458.3	Long	Oddball
11	210.5	longer	Short	700	Long	Oddball
11	40.8	longer	Short	541.7	Short	Oddball
11	111.8	longer	Long	650	Short	Oddball
11	701.7	shorter	Short	450	Long	Oddball
11	1176.5	shorter	Short	533.3	Short	Oddball
11	661.1	shorter	Long	375	Short	Oddball
11	1098.6	longer	Short	508.3	Long	Oddball
11	749.1	shorter	Short	541.7	Short	Oddball
11	611.9	longer	Short	583.3	Short	Oddball
11	521.6	shorter	Long	316.6	Short	Oddball
11	645.6	longer	Long	450	Long	Oddball
11	632.3	shorter	Long	358.3	Long	Oddball
11	227.6	longer	Long	550	Long	Oddball
11	1532.5	shorter	Short	458.3	Long	Oddball
11	631.4	longer	Long	658.3	Short	Oddball
11	277	longer	Long	700	Long	Oddball
11	1469.6	longer	Long	575	Long	Oddball
11	12.1	longer	Short	675	Long	Oddball
11	300.3	shorter	Short	491.6	Short	Oddball
11	776.7	shorter	Long	458.3	Short	Oddball
11	224.3	shorter	Long	300	Long	Oddball
11	91.7	longer	Long	558.3	Long	Oddball
11	56.9	longer	Short	683.3	Long	Oddball
11	290	shorter	Long	383.3	Short	Oddball
11	454.9	shorter	Short	300	Long	Oddball
11	444.2	shorter	Long	483.3	Short	Oddball
11	454.4	longer	Short	608.3	Long	Oddball
11	2550.5	longer	Short	650	Short	Oddball
11	227.5	shorter	Long	425	Short	Oddball
11	867.5	longer	Long	441.6	Long	Oddball
11	1901	shorter	Short	600	Long	Oddball
11	259.9	longer	Long	591.7	Short	Oddball
11	1053.7	shorter	Short	600	Long	Oddball
11	1440.8	longer	Short	575	Short	Oddball
11	348.6	shorter	Short	366.6	Short	Oddball
11	297.2	shorter	Short	641.7	Short	Oddball
11	491.4	shorter	Short	358.3	Short	Oddball
11	227.1	shorter	Long	383.3	Short	Oddball
11	444.6	shorter	Short	641.7	Long	Oddball
11	263	shorter	Long	366.6	Short	Oddball
11	331.7	longer	Long	491.6	Long	Oddball
11	817.5	longer	Short	633.3	Long	Oddball
11	264.4	shorter	Short	316.6	Short	Oddball
11	117.3	shorter	Short	325	Short	Oddball
11	11.9	longer	Short	625	Short	Oddball
11	1207.9	longer	Long	558.3	Short	Oddball
11	902.5	longer	Long	491.6	Long	Oddball
11	2123.7	longer	Long	433.3	Long	Oddball
11	96.8	shorter	Short	650	Long	Oddball
11	472.6	longer	Short	616.7	Short	Oddball
11	905.9	longer	Long	566.7	Short	Oddball
11	509.8	shorter	Short	308.3	Long	Oddball
11	311.8	longer	Long	508.3	Short	Oddball
11	1280.1	longer	Long	550	Long	Oddball
11	247.9	longer	Short	633.3	Long	Oddball
11	440.6	longer	Long	408.3	Short	Oddball
11	1087.8	longer	Short	683.3	Long	Oddball
11	413.9	longer	Short	666.7	Short	Oddball
11	193.1	shorter	Short	416.6	Short	Oddball
11	666.1	longer	Long	650	Short	Oddball
11	418.1	longer	Long	600	Long	Oddball
11	1702.3	longer	Short	583.3	Long	Oddball
11	133	shorter	Short	433.3	Short	Oddball
11	204.1	shorter	Long	358.3	Short	Oddball
11	638.8	longer	Long	600	Long	Oddball
11	1105	longer	Short	616.7	Long	Oddball
11	1792.5	longer	Long	575	Short	Oddball
11	2717.9	shorter	Short	375	Long	Oddball
11	1394.2	longer	Short	675	Short	Oddball
11	1552.4	shorter	Long	516.6	Short	Oddball
11	1110.3	longer	Long	566.7	Long	Oddball
11	727.8	shorter	Short	358.3	Long	Oddball
11	777.1	shorter	Long	308.3	Short	Oddball
11	255.9	shorter	Short	558.3	Long	Oddball
11	283.3	shorter	Long	333.3	Short	Oddball
11	20.5	shorter	Short	391.6	Long	Oddball
11	680.9	longer	Long	541.6	Short	Oddball
11	586.6	shorter	Long	350	Long	Oddball
11	409.3	shorter	Long	316.6	Long	Oddball
11	65	shorter	Long	466.6	Long	Oddball
11	943.5	longer	Short	483.3	Long	Oddball
11	1509.1	shorter	Long	383.3	Short	Oddball
11	133.1	longer	Long	358.3	Long	Oddball
11	79.6	longer	Long	683.3	Short	Oddball
11	1815.3	shorter	Long	600	Long	Oddball
11	356.9	longer	Long	508.3	Long	Oddball
11	1023.9	shorter	Long	433.3	Long	Oddball
11	284.5	shorter	Long	325	Long	Oddball
11	326.9	shorter	Long	325	Long	Oddball
11	122.9	longer	Long	641.7	Long	Oddball
11	1360.1	shorter	Short	658.3	Long	Oddball
11	418.9	shorter	Short	475	Short	Oddball
11	62.1	shorter	Short	408.3	Short	Oddball
11	25.4	shorter	Short	366.6	Short	Oddball
11	2148.7	longer	Long	558.3	Short	Oddball
11	71.7	longer	Short	675	Long	Oddball
11	855.7	longer	Long	600	Short	Oddball
11	115.9	shorter	Short	350	Long	Oddball
11	636.3	longer	Long	541.7	Short	Oddball
11	374.6	longer	Long	575	Long	Oddball
11	45	longer	Long	533.3	Long	Oddball
11	1750.2	shorter	Short	633.3	Long	Oddball
11	166.6	shorter	Short	341.6	Short	Oddball
11	479	longer	Long	491.6	Short	Oddball
11	0.8	longer	Short	583.3	Long	Oddball
11	286.8	shorter	Short	358.3	Short	Oddball
11	99	longer	Short	516.6	Short	Oddball
11	227	shorter	Long	566.7	Short	Oddball
11	54.1	longer	Long	366.6	Long	Oddball
11	532.1	longer	Long	666.7	Long	Oddball
11	1143.1	longer	Long	458.3	Long	Oddball
11	271.4	shorter	Long	316.6	Long	Oddball
11	194	shorter	Short	375	Long	Oddball
11	44.2	longer	Short	658.3	Short	Oddball
11	74.1	shorter	Short	316.6	Short	Oddball
11	52.9	shorter	Long	325	Short	Oddball
11	229.2	longer	Long	408.3	Long	Oddball
11	1496.3	longer	Long	566.7	Long	Oddball
11	1793	longer	Short	591.7	Long	Oddball
11	325.8	longer	Long	550	Short	Oddball
11	326.2	shorter	Long	333.3	Long	Oddball
11	159.4	longer	Short	550	Long	Oddball
11	62.5	shorter	Long	333.3	Short	Oddball
11	896.7	longer	Short	591.7	Long	Oddball
11	402.6	shorter	Short	366.6	Short	Oddball
11	246.2	shorter	Long	375	Short	Oddball
11	218.2	shorter	Short	366.6	Long	Oddball
11	817.5	longer	Long	466.6	Short	Oddball
11	681	shorter	Short	300	Long	Oddball
11	242.2	shorter	Short	400	Short	Oddball
11	1190.4	shorter	Short	558.3	Short	Oddball
11	530.9	shorter	Short	400	Short	Oddball
11	652.9	shorter	Long	491.6	Short	Oddball
11	564.4	longer	Short	666.7	Long	Oddball
11	143.2	longer	Short	475	Short	Oddball
11	201.2	shorter	Short	316.6	Short	Oddball
11	0.5	longer	Long	683.3	Short	Oddball
11	567.4	shorter	Short	533.3	Long	Oddball
11	630.1	longer	Short	658.3	Long	Oddball
11	161.3	longer	Short	400	Short	Oddball
11	310.4	shorter	Long	383.3	Short	Oddball
11	16.4	longer	Long	508.3	Long	Oddball
11	470.3	shorter	Short	341.6	Long	Oddball
11	199.2	shorter	Short	416.6	Short	Oddball
11	344.5	longer	Long	633.3	Short	Oddball
11	164.7	longer	Short	458.3	Long	Oddball
11	26.6	longer	Short	600	Short	Oddball
11	432.3	shorter	Long	500	Short	Oddball
11	228.7	shorter	Long	325	Long	Oddball
11	549.6	shorter	Short	458.3	Long	Oddball
11	1127.1	longer	Short	316.6	Short	Oddball
11	465.9	shorter	Short	508.3	Short	Oddball
11	347.6	shorter	Long	358.3	Short	Oddball
11	371.5	shorter	Short	366.6	Long	Oddball
11	1184.4	longer	Short	616.7	Short	Oddball
11	160.7	shorter	Long	475	Short	Oddball
11	527.7	shorter	Long	333.3	Long	Oddball
11	564.9	longer	Short	650	Long	Oddball
11	480.9	shorter	Long	408.3	Short	Oddball
11	72.6	longer	Long	600	Long	Oddball
11	390.9	longer	Long	441.6	Long	Oddball
11	412.3	shorter	Long	341.6	Long	Oddball
11	441.8	longer	Short	558.3	Long	Oddball
11	197.4	shorter	Short	375	Short	Oddball
11	35.3	longer	Short	566.7	Short	Oddball
11	56.5	shorter	Short	341.6	Short	Oddball
11	257.4	longer	Short	633.3	Short	Oddball
11	179.8	shorter	Long	350	Short	Oddball
11	230.2	shorter	Long	433.3	Long	Oddball
11	268.2	shorter	Long	491.6	Long	Oddball
11	537.1	shorter	Short	516.6	Long	Oddball
11	1291.4	longer	Long	675	Short	Oddball
11	201.9	longer	Short	650	Long	Oddball
11	778.2	longer	Long	658.3	Short	Oddball
11	176.5	longer	Long	533.3	Long	Oddball
11	592.5	shorter	Long	491.6	Long	Oddball
11	1116.8	longer	Long	566.7	Long	Oddball
11	618.6	shorter	Short	441.6	Long	Oddball
11	314.7	shorter	Long	450	Short	Oddball
11	182.6	shorter	Short	300	Long	Oddball
11	769.8	shorter	Short	441.6	Short	Oddball
11	299.1	shorter	Long	466.6	Short	Oddball
11	330	shorter	Short	433.3	Long	Oddball
11	1201.5	longer	Short	391.6	Short	Oddball
11	455.5	shorter	Long	516.6	Short	Oddball
11	223.3	longer	Short	658.3	Long	Oddball
11	9.2	shorter	Short	641.7	Short	Oddball
11	759.5	longer	Long	700	Short	Oddball
11	303.5	shorter	Long	508.3	Long	Oddball
11	465.8	shorter	Short	550	Long	Oddball
11	338.8	shorter	Long	375	Short	Oddball
11	361.1	shorter	Long	375	Long	Oddball
11	2032.7	shorter	Short	358.3	Long	Oddball
11	1039.4	longer	Long	691.7	Long	Oddball
11	5720.7	shorter	Short	633.3	Long	Oddball
11	1374.4	shorter	Short	633.3	Short	Oddball
11	951.1	shorter	Short	508.3	Short	Oddball
11	158	shorter	Short	383.3	Short	Oddball
11	563.6	shorter	Short	408.3	Short	Oddball
11	347.1	shorter	Short	358.3	Short	Oddball
11	308.7	longer	Long	683.3	Short	Oddball
11	641.3	longer	Short	683.3	Long	Oddball
11	107.5	shorter	Short	608.3	Short	Oddball
11	660.7	shorter	Short	566.7	Short	Oddball
11	353	shorter	Long	300	Short	Oddball
11	442.6	longer	Short	516.6	Long	Oddball
11	1133.1	shorter	Short	400	Short	Oddball
11	36.2	longer	Short	591.7	Short	Oddball
11	586.5	longer	Long	675	Short	Oddball
11	627.1	shorter	Short	508.3	Long	Oddball
11	286	shorter	Short	408.3	Short	Oddball
11	20.8	longer	Short	650	Short	Oddball
11	223.1	shorter	Short	433.3	Short	Oddball
11	153.8	shorter	Long	383.3	Short	Oddball
11	368.5	shorter	Long	550	Long	Oddball
11	570.2	shorter	Long	458.3	Long	Oddball
11	377.4	shorter	Short	358.3	Long	Oddball
11	153.3	shorter	Short	333.3	Short	Oddball
11	1771.6	longer	Long	658.3	Short	Oddball
11	88.1	shorter	Short	425	Long	Oddball
11	584.7	longer	Long	566.7	Short	Oddball
11	59.7	longer	Long	608.3	Long	Oddball
11	108.8	longer	Long	583.3	Long	Oddball
11	1213.7	longer	Short	575	Long	Oddball
11	619.5	shorter	Short	350	Short	Oddball
11	127.8	shorter	Long	341.6	Short	Oddball
11	296	shorter	Short	575	Long	Oddball
11	31.4	longer	Long	591.7	Short	Oddball
11	204.8	shorter	Long	308.3	Long	Oddball
11	91.7	shorter	Short	533.3	Long	Oddball
11	635.9	longer	Short	608.3	Short	Oddball
11	541.6	shorter	Long	391.6	Short	Oddball
11	39.9	longer	Long	466.6	Long	Oddball
11	278.3	shorter	Long	475	Long	Oddball
11	537.9	shorter	Short	341.6	Long	Oddball
11	960.9	shorter	Long	558.3	Short	Oddball
11	173.3	shorter	Short	433.3	Long	Oddball
11	424.1	longer	Long	433.3	Short	Oddball
11	364.1	shorter	Long	341.6	Long	Oddball
11	695.3	longer	Short	666.7	Long	Oddball
11	405.3	shorter	Long	425	Short	Oddball
11	312	shorter	Long	400	Long	Oddball
11	1328.3	longer	Long	550	Long	Oddball
11	1587.2	longer	Long	466.6	Long	Oddball
11	192.3	shorter	Short	391.6	Long	Oddball
11	688.4	longer	Long	475	Short	Oddball
11	123.3	shorter	Long	508.3	Long	Oddball
11	1279.7	longer	Long	641.7	Long	Oddball
12	614.3	shorter	Long	308.3	Short	Oddball
12	554.6	longer	Long	350	Long	Oddball
12	1346.5	longer	Short	358.3	Long	Oddball
12	818.9	shorter	Short	350	Short	Oddball
12	215.1	longer	Short	583.3	Short	Oddball
12	802.8	shorter	Long	366.6	Short	Oddball
12	469.1	longer	Long	608.3	Long	Oddball
12	165.3	longer	Short	633.3	Long	Oddball
12	650.2	longer	Short	416.6	Short	Oddball
12	565.1	longer	Short	583.3	Short	Oddball
12	123.9	longer	Short	575	Short	Oddball
12	310.6	longer	Long	475	Short	Oddball
12	1916.1	shorter	Short	458.3	Long	Oddball
12	107.1	longer	Long	575	Short	Oddball
12	538.8	longer	Long	366.6	Long	Oddball
12	1042.3	shorter	Short	383.3	Long	Oddball
12	662.8	shorter	Short	350	Short	Oddball
12	398	shorter	Short	466.6	Short	Oddball
12	133.2	longer	Short	533.3	Short	Oddball
12	896.4	longer	Short	491.6	Short	Oddball
12	1220	longer	Long	683.3	Short	Oddball
12	2468.2	longer	Long	441.6	Long	Oddball
12	1161.6	shorter	Short	500	Long	Oddball
12	840.1	shorter	Short	383.3	Short	Oddball
12	907.4	shorter	Long	350	Short	Oddball
12	382.9	shorter	Short	508.3	Long	Oddball
12	916.9	longer	Long	533.3	Short	Oddball
12	935.4	shorter	Short	325	Long	Oddball
12	1147	longer	Long	641.7	Short	Oddball
12	1025.8	shorter	Short	391.6	Long	Oddball
12	1740	longer	Long	583.3	Short	Oddball
12	1791.2	longer	Long	650	Long	Oddball
12	673.8	shorter	Long	408.3	Long	Oddball
12	968.1	longer	Long	433.3	Long	Oddball
12	539.1	longer	Long	625	Long	Oddball
12	3340.4	shorter	Long	300	Long	Oddball
12	912	shorter	Short	475	Long	Oddball
12	763.1	shorter	Short	316.6	Short	Oddball
12	1677.3	longer	Short	491.6	Short	Oddball
12	1451.8	longer	Long	425	Short	Oddball
12	1459.4	longer	Long	625	Long	Oddball
12	1472.6	longer	Long	475	Long	Oddball
12	5296.6	longer	Short	433.3	Long	Oddball
12	57.4	longer	Short	583.3	Short	Oddball
12	634.9	longer	Short	608.3	Short	Oddball
12	1796.3	shorter	Long	400	Short	Oddball
12	281.7	longer	Short	575	Long	Oddball
12	168	longer	Long	633.3	Short	Oddball
12	1010.7	longer	Long	433.3	Long	Oddball
12	4068.3	shorter	Long	416.6	Long	Oddball
12	1535.9	longer	Long	500	Long	Oddball
12	4652.9	longer	Short	641.7	Long	Oddball
12	505.9	longer	Long	683.3	Short	Oddball
12	1085.6	longer	Long	491.6	Long	Oddball
12	1043.9	longer	Long	425	Long	Oddball
12	1018.7	longer	Short	491.6	Long	Oddball
12	765.3	longer	Long	583.3	Short	Oddball
12	1691.2	shorter	Long	350	Long	Oddball
12	795.7	shorter	Short	400	Long	Oddball
12	342.3	shorter	Long	408.3	Short	Oddball
12	927.9	shorter	Short	525	Long	Oddball
12	1169.2	longer	Long	508.3	Short	Oddball
12	894.6	shorter	Short	400	Long	Oddball
12	1460.2	longer	Long	433.3	Short	Oddball
12	729.4	shorter	Short	316.6	Long	Oddball
12	1036.4	longer	Long	466.6	Short	Oddball
12	431.5	shorter	Short	391.6	Long	Oddball
12	394.8	longer	Long	558.3	Short	Oddball
12	400.8	shorter	Short	366.6	Long	Oddball
12	1007.3	longer	Short	541.6	Short	Oddball
12	206.4	longer	Short	516.6	Short	Oddball
12	483.5	shorter	Long	341.6	Short	Oddball
12	259.5	longer	Long	583.3	Long	Oddball
12	121.5	longer	Long	658.3	Long	Oddball
12	206.1	longer	Short	675	Long	Oddball
12	833.3	longer	Short	425	Short	Oddball
12	186.5	longer	Short	441.6	Short	Oddball
12	605.9	longer	Long	400	Short	Oddball
12	3719.1	longer	Long	433.3	Long	Oddball
12	2370.3	longer	Short	500	Long	Oddball
12	320.5	longer	Long	541.6	Short	Oddball
12	566.8	longer	Long	591.7	Long	Oddball
12	598.5	longer	Long	508.3	Long	Oddball
12	370.8	longer	Long	566.6	Long	Oddball
12	2005.8	longer	Long	625	Long	Oddball
12	422.8	longer	Short	675	Long	Oddball
12	4043.7	longer	Long	525	Short	Oddball
12	377.7	shorter	Short	308.3	Long	Oddball
12	411.4	longer	Long	450	Short	Oddball
12	1392.3	shorter	Long	533.3	Long	Oddball
12	296.8	shorter	Short	300	Long	Oddball
12	465.4	longer	Short	600	Short	Oddball
12	140.3	longer	Short	566.6	Short	Oddball
12	979.1	shorter	Short	591.7	Short	Oddball
12	349.8	shorter	Long	425	Short	Oddball
12	666.5	shorter	Long	400	Long	Oddball
12	2811.4	shorter	Long	575	Long	Oddball
12	387.1	longer	Short	300	Long	Oddball
12	13.8	longer	Long	616.7	Short	Oddball
12	687.7	shorter	Short	450	Long	Oddball
12	276.2	shorter	Short	308.3	Short	Oddball
12	144.8	shorter	Short	316.6	Short	Oddball
12	45.2	longer	Long	616.7	Short	Oddball
12	593.4	longer	Short	558.3	Long	Oddball
12	327.9	shorter	Short	550	Short	Oddball
12	4.1	longer	Short	675	Short	Oddball
12	711.4	longer	Short	625	Short	Oddball
12	843.5	longer	Short	691.7	Short	Oddball
12	577.2	longer	Short	450	Long	Oddball
12	385.8	longer	Long	675	Short	Oddball
12	1380.5	shorter	Long	416.6	Long	Oddball
12	255.1	longer	Long	625	Long	Oddball
12	343	longer	Short	658.3	Long	Oddball
12	932.9	longer	Short	416.6	Short	Oddball
12	2867.9	shorter	Short	591.6	Short	Oddball
12	894.3	longer	Short	375	Short	Oddball
12	571.6	longer	Long	441.6	Short	Oddball
12	107.6	longer	Long	700	Long	Oddball
12	298.6	longer	Long	583.3	Long	Oddball
12	127.6	longer	Long	641.7	Long	Oddball
12	20.3	longer	Long	625	Long	Oddball
12	315.4	longer	Long	675	Long	Oddball
12	628.3	longer	Short	566.6	Long	Oddball
12	11.3	longer	Long	466.6	Short	Oddball
12	198.3	longer	Long	583.3	Long	Oddball
12	3256.3	shorter	Long	425	Long	Oddball
12	960.4	shorter	Long	608.3	Long	Oddball
12	246.5	longer	Short	591.7	Long	Oddball
12	6502.2	shorter	Short	466.6	Short	Oddball
12	1100.1	longer	Long	408.3	Short	Oddball
12	259.2	longer	Short	625	Long	Oddball
12	157.6	longer	Long	550	Short	Oddball
12	2944	longer	Short	483.3	Long	Oddball
12	2597.3	longer	Short	425	Short	Oddball
12	210	longer	Short	591.7	Short	Oddball
12	265.9	longer	Short	500	Short	Oddball
12	203.1	longer	Short	608.3	Short	Oddball
12	339.8	longer	Long	450	Short	Oddball
12	328.7	shorter	Short	450	Long	Oddball
12	332.4	longer	Long	650	Short	Oddball
12	3706.3	longer	Long	383.3	Long	Oddball
12	233.9	longer	Short	608.3	Long	Oddball
12	1423.4	longer	Short	533.3	Short	Oddball
12	371.6	longer	Short	583.3	Short	Oddball
12	1847.4	longer	Short	641.7	Short	Oddball
12	676.5	shorter	Short	333.3	Short	Oddball
12	650.8	shorter	Long	433.3	Short	Oddball
12	3284.6	shorter	Short	608.3	Long	Oddball
12	9	longer	Long	466.6	Short	Oddball
12	224.4	longer	Long	475	Long	Oddball
12	48.3	longer	Short	483.3	Long	Oddball
12	447.8	longer	Short	675	Short	Oddball
12	1043.2	shorter	Long	541.6	Short	Oddball
12	277.6	longer	Short	600	Long	Oddball
12	681.4	shorter	Long	500	Short	Oddball
12	721.2	longer	Short	433.3	Long	Oddball
12	425.2	longer	Long	350	Short	Oddball
12	570.2	shorter	Long	416.6	Long	Oddball
12	155.6	longer	Long	666.7	Long	Oddball
12	174.1	longer	Short	691.7	Long	Oddball
12	408	longer	Short	483.3	Short	Oddball
12	250.6	shorter	Short	433.3	Short	Oddball
12	1449.2	longer	Long	450	Short	Oddball
12	294.7	longer	Long	475	Short	Oddball
12	268.3	longer	Long	633.3	Long	Oddball
12	99.6	longer	Short	458.3	Long	Oddball
12	506.1	longer	Short	641.7	Short	Oddball
12	218.2	longer	Long	366.6	Short	Oddball
12	179.4	longer	Short	658.3	Long	Oddball
12	353.7	longer	Long	533.3	Short	Oddball
12	853.3	shorter	Short	466.6	Long	Oddball
12	449.8	longer	Short	541.6	Short	Oddball
12	304.3	longer	Short	691.7	Short	Oddball
12	65	longer	Long	550	Short	Oddball
12	390.9	longer	Short	500	Long	Oddball
12	157.5	longer	Short	550	Short	Oddball
12	408.8	longer	Long	625	Short	Oddball
12	269	longer	Short	591.6	Long	Oddball
12	316.3	longer	Short	458.3	Short	Oddball
12	340.3	longer	Long	550	Short	Oddball
12	956.6	shorter	Long	516.6	Long	Oddball
12	1762.9	shorter	Long	358.3	Long	Oddball
12	804.5	shorter	Long	466.6	Long	Oddball
12	337.1	shorter	Long	350	Long	Oddball
12	456	shorter	Short	400	Long	Oddball
12	387.7	longer	Long	525	Short	Oddball
12	254.4	shorter	Long	416.6	Long	Oddball
12	987.3	longer	Short	533.3	Long	Oddball
12	217.8	shorter	Short	358.3	Short	Oddball
12	94.4	longer	Short	575	Short	Oddball
12	494.1	longer	Long	383.3	Short	Oddball
12	209	longer	Short	541.6	Long	Oddball
12	398.5	shorter	Short	358.3	Short	Oddball
12	176.4	longer	Short	458.3	Short	Oddball
12	442.8	longer	Long	633.3	Short	Oddball
12	216.5	longer	Long	483.3	Long	Oddball
12	274	longer	Short	650	Long	Oddball
12	316.9	longer	Short	558.3	Short	Oddball
12	300.9	longer	Long	550	Short	Oddball
12	2495.4	longer	Short	541.6	Long	Oddball
12	206.6	longer	Long	591.6	Short	Oddball
12	663.8	longer	Short	475	Long	Oddball
12	546.8	longer	Long	533.3	Short	Oddball
12	484.5	shorter	Long	350	Long	Oddball
12	1144.5	shorter	Long	683.3	Long	Oddball
12	2456.2	shorter	Short	366.6	Long	Oddball
12	285.6	shorter	Short	316.6	Short	Oddball
12	376.9	shorter	Short	341.6	Short	Oddball
12	232.2	longer	Long	508.3	Short	Oddball
12	956.3	shorter	Long	333.3	Long	Oddball
12	179.3	shorter	Long	341.6	Long	Oddball
12	369.4	shorter	Long	316.6	Long	Oddball
12	338.1	longer	Long	683.3	Long	Oddball
12	610.6	longer	Short	558.3	Long	Oddball
12	2023.7	shorter	Short	366.6	Short	Oddball
12	1367.5	longer	Short	483.3	Short	Oddball
12	427	longer	Short	608.3	Short	Oddball
12	666.6	shorter	Short	491.6	Short	Oddball
12	407.8	longer	Short	508.3	Short	Oddball
12	247.7	longer	Long	658.3	Short	Oddball
12	503	longer	Short	683.3	Long	Oddball
12	658.2	longer	Short	525	Short	Oddball
12	747.5	shorter	Long	375	Short	Oddball
12	340.8	shorter	Long	491.6	Long	Oddball
12	1023.5	shorter	Long	658.3	Long	Oddball
12	263.8	longer	Long	441.6	Long	Oddball
12	1517.3	shorter	Short	508.3	Long	Oddball
12	445.1	shorter	Short	391.6	Short	Oddball
12	476.7	longer	Short	475	Short	Oddball
12	85	longer	Long	583.3	Short	Oddball
12	278.7	longer	Long	541.6	Long	Oddball
12	106.6	shorter	Short	333.3	Long	Oddball
12	173.9	longer	Short	325	Short	Oddball
12	2120.2	shorter	Long	433.3	Short	Oddball
12	275.9	longer	Short	691.7	Long	Oddball
12	3504.2	longer	Long	483.3	Short	Oddball
12	449.2	shorter	Short	375	Long	Oddball
12	1403	shorter	Short	408.3	Short	Oddball
12	1156.1	longer	Short	675	Short	Oddball
12	4529.1	shorter	Short	425	Short	Oddball
12	296.4	longer	Long	550	Short	Oddball
12	699.3	shorter	Short	341.6	Long	Oddball
12	3988.1	shorter	Short	583.3	Short	Oddball
12	321.8	shorter	Long	333.3	Short	Oddball
12	670.5	longer	Long	633.3	Long	Oddball
12	185.8	longer	Long	516.6	Long	Oddball
12	412.4	shorter	Short	458.3	Long	Oddball
12	145.9	shorter	Short	358.3	Short	Oddball
12	241.7	longer	Long	333.3	Short	Oddball
12	2643.3	shorter	Long	383.3	Long	Oddball
12	264.8	longer	Long	483.3	Long	Oddball
12	1659.8	longer	Long	333.3	Long	Oddball
12	690.6	longer	Short	675	Long	Oddball
12	147.4	longer	Short	591.6	Short	Oddball
12	576.5	longer	Long	400	Short	Oddball
12	1205.3	shorter	Short	408.3	Long	Oddball
12	983.6	longer	Long	608.3	Short	Oddball
12	1933	longer	Short	383.3	Long	Oddball
12	339.8	longer	Short	600	Short	Oddball
12	223.4	longer	Long	641.7	Short	Oddball
12	574.4	longer	Long	675	Long	Oddball
12	753.8	longer	Long	608.3	Long	Oddball
12	231.8	longer	Long	566.6	Long	Oddball
12	261.3	longer	Short	541.6	Long	Oddball
12	987.7	shorter	Long	450	Short	Oddball
12	901.8	shorter	Short	466.6	Long	Oddball
12	27.1	longer	Long	633.3	Short	Oddball
12	512.2	longer	Long	516.7	Long	Oddball
12	3752.6	longer	Short	583.3	Long	Oddball
12	750.3	longer	Long	566.6	Short	Oddball
12	464	shorter	Long	475	Long	Oddball
12	394.5	longer	Long	566.6	Short	Oddball
12	247.9	shorter	Long	341.6	Long	Oddball
12	344.2	longer	Long	616.7	Long	Oddball
12	408.6	shorter	Long	516.6	Long	Oddball
12	3078.2	shorter	Long	316.6	Long	Oddball
12	643.8	shorter	Short	483.3	Long	Oddball
12	2069.8	longer	Long	575	Short	Oddball
12	1030.7	shorter	Long	375	Long	Oddball
12	1375.9	longer	Long	608.3	Long	Oddball
12	307.5	shorter	Long	400	Long	Oddball
12	589.1	shorter	Short	558.3	Long	Oddball
12	717.1	longer	Long	483.3	Short	Oddball
12	1314.7	shorter	Long	408.3	Long	Oddball
12	854.5	longer	Short	500	Long	Oddball
12	449.7	shorter	Short	375	Short	Oddball
12	554	shorter	Long	408.3	Short	Oddball
12	1531.9	longer	Short	508.3	Long	Oddball
12	557.1	shorter	Long	308.3	Short	Oddball
12	342	longer	Short	525	Long	Oddball
12	673.9	shorter	Short	466.6	Short	Oddball
12	311.1	shorter	Short	300	Short	Oddball
12	1161.1	shorter	Long	308.3	Short	Oddball
12	3008.5	longer	Short	358.3	Long	Oddball
12	306.8	shorter	Short	433.3	Short	Oddball
12	1048.2	shorter	Long	625	Short	Oddball
12	166.7	shorter	Short	500	Long	Oddball
12	421.9	shorter	Short	358.3	Short	Oddball
12	40.8	longer	Short	616.6	Short	Oddball
12	215.5	longer	Long	658.3	Short	Oddball
12	100.1	longer	Short	575	Long	Oddball
12	111.4	longer	Long	483.3	Short	Oddball
12	1000.2	shorter	Long	341.6	Long	Oddball
12	1061.8	longer	Long	325	Long	Oddball
12	402.1	longer	Long	700	Long	Oddball
12	1294.2	shorter	Short	400	Long	Oddball
12	367	longer	Short	591.6	Short	Oddball
12	265.3	longer	Short	683.3	Short	Oddball
12	3125.7	longer	Short	525	Short	Oddball
12	1113.3	longer	Short	683.3	Short	Oddball
12	842.8	shorter	Short	358.3	Short	Oddball
12	1115.1	longer	Long	616.7	Short	Oddball
12	308.4	longer	Long	525	Long	Oddball
12	1284.1	longer	Long	366.6	Long	Oddball
12	4266.9	longer	Long	408.3	Long	Oddball
12	73.8	longer	Short	658.3	Long	Oddball
12	1596.6	longer	Short	558.3	Short	Oddball
12	854.1	shorter	Short	475	Short	Oddball
12	618.9	longer	Short	533.3	Short	Oddball
12	172.7	longer	Short	641.7	Short	Oddball
12	813.9	longer	Short	508.3	Short	Oddball
12	2744.5	longer	Long	591.6	Short	Oddball
12	711.7	shorter	Long	341.6	Long	Oddball
12	243.8	longer	Short	691.7	Long	Oddball
12	2402.8	shorter	Long	450	Short	Oddball
12	589	longer	Long	608.3	Long	Oddball
13	645.1	longer	Long	625	Short	Oddball
13	1032.4	shorter	Long	541.7	Long	Oddball
13	925.5	shorter	Short	341.6	Long	Oddball
13	3105.6	shorter	Short	475	Short	Oddball
13	903.9	shorter	Short	441.6	Short	Oddball
13	1644.6	shorter	Short	483.3	Short	Oddball
13	1117	shorter	Short	450	Short	Oddball
13	1227.5	shorter	Short	425	Short	Oddball
13	742	longer	Long	575	Short	Oddball
13	884.2	shorter	Short	408.3	Long	Oddball
13	2868	shorter	Short	425	Short	Oddball
13	3108	shorter	Long	391.6	Short	Oddball
13	782.3	longer	Short	533.3	Long	Oddball
13	1080.7	shorter	Short	458.3	Short	Oddball
13	546	longer	Long	558.3	Short	Oddball
13	461.3	longer	Long	641.7	Long	Oddball
13	761.8	shorter	Short	333.3	Long	Oddball
13	444.8	longer	Long	633.3	Short	Oddball
13	651.1	longer	Long	666.7	Long	Oddball
13	530.4	longer	Long	633.3	Long	Oddball
13	859.5	longer	Short	550	Long	Oddball
13	639.1	longer	Long	516.6	Short	Oddball
13	778.1	shorter	Long	358.3	Long	Oddball
13	2320.7	shorter	Long	325	Long	Oddball
13	2342	longer	Short	450	Long	Oddball
13	551.4	longer	Short	525	Short	Oddball
13	419.9	longer	Short	641.7	Short	Oddball
13	3470.5	shorter	Long	383.3	Short	Oddball
13	470	longer	Short	641.7	Long	Oddball
13	3999.9	longer	Long	550	Short	Oddball
13	877.9	shorter	Long	308.3	Long	Oddball
13	571.1	longer	Short	500	Long	Oddball
13	674.4	longer	Long	516.7	Short	Oddball
13	922.3	shorter	Long	391.6	Long	Oddball
13	1906.3	longer	Long	550	Long	Oddball
13	764.3	shorter	Short	350	Long	Oddball
13	826	shorter	Long	366.6	Short	Oddball
13	559.1	longer	Short	550	Long	Oddball
13	530.6	longer	Short	658.3	Short	Oddball
13	2680.5	longer	Long	391.6	Short	Oddball
13	446	longer	Long	650	Long	Oddball
13	2089.1	longer	Short	583.3	Long	Oddball
13	5504.1	shorter	Long	600	Short	Oddball
13	770.2	longer	Short	541.7	Long	Oddball
13	1011.5	longer	Long	466.6	Short	Oddball
13	540.7	longer	Long	625	Long	Oddball
13	693	shorter	Long	316.6	Long	Oddball
13	484.9	longer	Short	616.7	Long	Oddball
13	458	longer	Short	691.7	Short	Oddball
13	1389.3	shorter	Long	325	Short	Oddball
13	357.2	longer	Long	683.3	Long	Oddball
13	870.5	longer	Long	675	Long	Oddball
13	697.6	longer	Short	558.3	Long	Oddball
13	478.6	longer	Long	666.7	Short	Oddball
13	560.9	shorter	Long	333.3	Long	Oddball
13	1682.1	shorter	Short	516.7	Long	Oddball
13	693.5	longer	Short	533.3	Short	Oddball
13	655.7	shorter	Short	358.3	Short	Oddball
13	786.3	shorter	Long	350	Short	Oddball
13	774.8	shorter	Short	408.3	Long	Oddball
13	498.3	longer	Short	641.7	Short	Oddball
13	2117.6	shorter	Long	491.6	Short	Oddball
13	481.3	longer	Short	491.6	Long	Oddball
13	286.7	longer	Short	691.7	Short	Oddball
13	584.6	shorter	Short	375	Short	Oddball
13	324.8	longer	Short	616.7	Short	Oddball
13	207.5	longer	Long	475	Short	Oddball
13	893.5	shorter	Long	308.3	Long	Oddball
13	760.7	shorter	Short	333.3	Long	Oddball
13	647.6	longer	Long	533.3	Short	Oddball
13	1271.9	longer	Long	616.7	Long	Oddball
13	613	shorter	Short	308.3	Long	Oddball
13	617.2	longer	Short	591.7	Short	Oddball
13	1473.3	shorter	Short	483.3	Short	Oddball
13	633.4	shorter	Short	433.3	Short	Oddball
13	1629	shorter	Long	541.7	Short	Oddball
13	624.5	shorter	Short	391.6	Long	Oddball
13	629.4	longer	Long	516.7	Short	Oddball
13	853	longer	Long	650	Long	Oddball
13	183.9	longer	Short	583.3	Long	Oddball
13	267.5	longer	Long	591.7	Short	Oddball
13	281.5	longer	Long	450	Long	Oddball
13	628.9	shorter	Long	308.3	Long	Oddball
13	861.4	longer	Short	666.7	Long	Oddball
13	717.7	shorter	Long	400	Short	Oddball
13	567.5	shorter	Short	341.6	Long	Oddball
13	2718	shorter	Short	375	Short	Oddball
13	1464.6	shorter	Short	516.7	Short	Oddball
13	1731.1	longer	Long	541.7	Short	Oddball
13	589.5	shorter	Short	316.6	Long	Oddball
13	350.2	longer	Long	666.7	Short	Oddball
13	149.5	longer	Long	533.3	Long	Oddball
13	292.9	longer	Long	533.3	Long	Oddball
13	192.9	longer	Long	675	Long	Oddball
13	681.2	shorter	Long	466.6	Long	Oddball
13	740.5	shorter	Long	508.3	Long	Oddball
13	556.7	shorter	Short	358.3	Long	Oddball
13	461.3	longer	Long	500	Short	Oddball
13	271.2	longer	Short	600	Long	Oddball
13	151.4	longer	Short	633.3	Short	Oddball
13	247.2	longer	Short	558.3	Short	Oddball
13	233.6	longer	Long	566.7	Short	Oddball
13	385	longer	Long	450	Long	Oddball
13	174	longer	Long	558.3	Long	Oddball
13	879.5	longer	Short	691.7	Long	Oddball
13	2270.9	shorter	Short	441.6	Short	Oddball
13	4350.7	shorter	Long	400	Short	Oddball
13	814.9	longer	Long	500	Long	Oddball
13	824.9	longer	Long	408.3	Long	Oddball
13	1214.4	shorter	Short	341.6	Long	Oddball
13	1186.8	shorter	Short	383.3	Short	Oddball
13	537.6	longer	Short	550	Short	Oddball
13	447.3	longer	Long	391.6	Short	Oddball
13	70.2	longer	Short	491.6	Long	Oddball
13	722.7	shorter	Short	325	Short	Oddball
13	63.7	longer	Long	425	Short	Oddball
13	254.1	longer	Long	650	Long	Oddball
13	680.6	longer	Short	391.6	Long	Oddball
13	16.2	longer	Long	600	Short	Oddball
13	165.5	longer	Short	558.3	Long	Oddball
13	391.5	longer	Long	450	Short	Oddball
13	45.8	longer	Long	516.7	Long	Oddball
13	5.7	longer	Short	666.7	Long	Oddball
13	606.6	longer	Short	683.3	Short	Oddball
13	93.4	longer	Short	533.3	Short	Oddball
13	271.5	longer	Long	525	Short	Oddball
13	827.4	shorter	Short	341.6	Long	Oddball
13	617	longer	Long	500	Short	Oddball
13	182.5	longer	Short	550	Long	Oddball
13	700.5	longer	Long	333.3	Short	Oddball
13	2438.1	longer	Long	433.3	Long	Oddball
13	1083.8	shorter	Short	325	Long	Oddball
13	2486.9	shorter	Short	341.6	Short	Oddball
13	476.7	longer	Long	633.3	Short	Oddball
13	165.5	longer	Short	608.3	Long	Oddball
13	58.7	longer	Short	608.3	Short	Oddball
13	288.8	longer	Long	458.3	Short	Oddball
13	74	longer	Short	591.7	Long	Oddball
13	474.6	longer	Short	416.6	Short	Oddball
13	21.6	longer	Long	516.7	Short	Oddball
13	76.8	longer	Short	508.3	Long	Oddball
13	2.7	longer	Short	683.3	Short	Oddball
13	96.4	longer	Long	525	Short	Oddball
13	747.3	shorter	Short	341.6	Long	Oddball
13	94.6	longer	Long	441.6	Short	Oddball
13	8.3	longer	Long	533.3	Long	Oddball
13	84.9	longer	Short	583.3	Long	Oddball
13	774.9	shorter	Long	333.3	Short	Oddball
13	117.5	longer	Long	525	Long	Oddball
13	1259.9	longer	Long	391.6	Long	Oddball
13	153.1	longer	Long	675	Long	Oddball
13	184	longer	Short	583.3	Long	Oddball
13	124.5	longer	Short	608.3	Short	Oddball
13	401.9	longer	Long	408.3	Short	Oddball
13	3614.2	shorter	Long	358.3	Long	Oddball
13	75.5	longer	Long	516.6	Long	Oddball
13	58.1	longer	Short	666.7	Long	Oddball
13	1952	shorter	Short	300	Short	Oddball
13	467	longer	Short	675	Short	Oddball
13	719.5	shorter	Short	325	Short	Oddball
13	2216.5	shorter	Long	325	Short	Oddball
13	8	longer	Long	658.3	Long	Oddball
13	2126.1	shorter	Long	483.3	Long	Oddball
13	428.9	longer	Long	566.7	Long	Oddball
13	736.4	shorter	Short	391.6	Long	Oddball
13	0.6	longer	Short	566.7	Short	Oddball
13	484.2	longer	Long	575	Short	Oddball
13	180.9	longer	Long	566.7	Long	Oddball
13	52.9	longer	Long	491.6	Long	Oddball
13	231.3	longer	Long	558.3	Long	Oddball
13	727	shorter	Long	450	Long	Oddball
13	2686.6	shorter	Long	350	Long	Oddball
13	639.6	shorter	Short	391.6	Long	Oddball
13	383.2	longer	Long	641.7	Short	Oddball
13	625.7	shorter	Short	458.3	Long	Oddball
13	291.9	longer	Short	625	Short	Oddball
13	550.4	shorter	Short	350	Short	Oddball
13	311.1	longer	Long	500	Short	Oddball
13	295.4	longer	Long	550	Long	Oddball
13	512.8	shorter	Long	341.6	Long	Oddball
13	850.4	longer	Long	516.6	Long	Oddball
13	618.2	shorter	Short	458.3	Long	Oddball
13	298.7	longer	Short	675	Short	Oddball
13	263.6	longer	Short	683.3	Short	Oddball
13	444.1	longer	Short	533.3	Short	Oddball
13	504.3	longer	Short	558.4	Short	Oddball
13	340.8	longer	Short	691.7	Short	Oddball
13	499.3	longer	Short	600	Short	Oddball
13	475	longer	Long	575	Short	Oddball
13	428.3	longer	Long	558.3	Long	Oddball
13	1300.6	longer	Long	433.3	Long	Oddball
13	513.5	longer	Long	641.7	Long	Oddball
13	735.1	longer	Long	616.7	Long	Oddball
13	938.9	shorter	Short	475	Long	Oddball
13	710.2	shorter	Long	450	Short	Oddball
13	780.7	shorter	Short	433.3	Long	Oddball
13	589.9	shorter	Short	300	Short	Oddball
13	1953.7	shorter	Short	425	Short	Oddball
13	460.4	longer	Short	483.3	Short	Oddball
13	546.3	shorter	Short	300	Short	Oddball
13	573.5	longer	Short	483.3	Short	Oddball
13	638.3	shorter	Short	508.3	Short	Oddball
13	376.3	longer	Long	583.3	Short	Oddball
13	252.5	longer	Short	625	Long	Oddball
13	1394.1	longer	Long	475	Short	Oddball
13	672.2	longer	Short	558.3	Long	Oddball
13	293.8	longer	Long	658.3	Short	Oddball
13	695.5	shorter	Long	333.3	Long	Oddball
13	319.7	longer	Short	608.3	Long	Oddball
13	211.7	longer	Long	650	Short	Oddball
13	559.9	shorter	Short	391.6	Long	Oddball
13	501.2	shorter	Long	375	Short	Oddball
13	1899.4	shorter	Short	450	Long	Oddball
13	328.8	longer	Short	466.6	Short	Oddball
13	406.5	longer	Long	600	Short	Oddball
13	288.4	longer	Long	616.7	Long	Oddball
13	887.3	longer	Short	650	Long	Oddball
13	266.4	longer	Short	558.3	Short	Oddball
13	550.4	shorter	Long	300	Short	Oddball
13	516.1	shorter	Long	375	Long	Oddball
13	477.6	longer	Short	550	Long	Oddball
13	479.5	shorter	Short	383.3	Short	Oddball
13	508.8	longer	Long	658.3	Short	Oddball
13	548.6	shorter	Short	400	Long	Oddball
13	325.6	longer	Long	691.7	Short	Oddball
13	397.3	longer	Long	550	Long	Oddball
13	837.8	shorter	Short	500	Long	Oddball
13	374.2	longer	Short	658.3	Short	Oddball
13	265.1	longer	Short	458.3	Short	Oddball
13	499.5	longer	Long	541.7	Short	Oddball
13	723.6	shorter	Short	400	Long	Oddball
13	558.2	shorter	Short	316.6	Short	Oddball
13	614.8	shorter	Long	491.6	Short	Oddball
13	441.3	longer	Short	633.3	Long	Oddball
13	503.2	shorter	Short	316.6	Short	Oddball
13	444.5	longer	Long	433.3	Short	Oddball
13	1081.8	longer	Long	691.7	Long	Oddball
13	441	longer	Long	608.3	Long	Oddball
13	306.5	longer	Short	625	Long	Oddball
13	153.9	longer	Long	583.3	Short	Oddball
13	594.3	shorter	Long	308.3	Long	Oddball
13	170.9	longer	Long	458.3	Long	Oddball
13	1213.9	shorter	Long	425	Long	Oddball
13	685.9	shorter	Long	458.3	Long	Oddball
13	478.2	longer	Long	575	Long	Oddball
13	39.1	longer	Long	566.6	Long	Oddball
13	730.7	shorter	Short	383.3	Long	Oddball
13	376.5	longer	Short	633.3	Short	Oddball
13	74.2	longer	Long	450	Short	Oddball
13	133.8	longer	Short	541.7	Long	Oddball
13	256.7	longer	Short	500	Short	Oddball
13	175	longer	Long	458.3	Short	Oddball
13	539.3	longer	Long	583.3	Long	Oddball
13	112.3	longer	Long	608.3	Long	Oddball
13	230.2	longer	Short	650	Long	Oddball
13	118.4	longer	Short	475	Short	Oddball
13	89.8	longer	Long	666.7	Short	Oddball
13	606.3	shorter	Short	308.3	Long	Oddball
13	364.2	longer	Short	558.3	Short	Oddball
13	874.7	shorter	Short	383.3	Short	Oddball
13	407.7	longer	Long	466.6	Short	Oddball
13	59.9	longer	Short	591.7	Long	Oddball
13	103.4	longer	Short	558.3	Short	Oddball
13	30.8	longer	Long	583.3	Short	Oddball
13	113.5	longer	Long	575	Long	Oddball
13	106.7	longer	Short	566.7	Long	Oddball
13	107.4	longer	Long	550	Short	Oddball
13	171.6	longer	Short	591.7	Long	Oddball
13	141.8	longer	Short	683.3	Short	Oddball
13	667.5	shorter	Long	383.3	Short	Oddball
13	1004.6	shorter	Short	416.6	Long	Oddball
13	666.3	shorter	Long	516.6	Short	Oddball
13	140.1	longer	Short	500	Short	Oddball
13	1480.6	longer	Short	658.3	Short	Oddball
13	603.7	shorter	Short	350	Short	Oddball
13	61.6	longer	Short	458.3	Short	Oddball
13	599.1	shorter	Short	408.3	Short	Oddball
13	473.1	longer	Long	616.7	Short	Oddball
13	32.8	longer	Long	608.3	Long	Oddball
13	571.1	shorter	Long	375	Long	Oddball
13	472.8	longer	Long	558.3	Long	Oddball
13	444.7	longer	Long	500	Long	Oddball
13	602	shorter	Short	333.3	Long	Oddball
13	489.8	shorter	Short	308.3	Short	Oddball
13	505.2	shorter	Long	400	Short	Oddball
13	1349.1	shorter	Long	466.6	Long	Oddball
13	1071.9	shorter	Short	483.3	Long	Oddball
13	605	shorter	Short	308.3	Short	Oddball
13	673.7	longer	Long	550	Short	Oddball
13	511.5	longer	Short	683.3	Long	Oddball
13	599.7	shorter	Short	391.6	Short	Oddball
13	506.5	longer	Short	633.3	Short	Oddball
13	980.3	longer	Short	558.3	Short	Oddball
13	149.1	longer	Short	508.3	Short	Oddball
13	162.2	longer	Long	591.7	Short	Oddball
13	482.2	shorter	Long	308.3	Long	Oddball
13	521.1	shorter	Short	450	Long	Oddball
13	564.2	shorter	Short	308.3	Short	Oddball
13	563.9	shorter	Long	316.6	Short	Oddball
13	505.9	longer	Long	558.3	Long	Oddball
13	547.6	shorter	Long	325	Long	Oddball
13	273.4	longer	Short	616.7	Long	Oddball
13	493.7	shorter	Short	333.3	Short	Oddball
13	568.3	shorter	Long	308.3	Short	Oddball
13	493.5	longer	Short	608.3	Long	Oddball
13	485.4	longer	Long	575	Short	Oddball
13	514.1	longer	Long	466.6	Long	Oddball
13	608.4	longer	Long	400	Long	Oddball
13	623	shorter	Short	333.3	Long	Oddball
13	661.8	shorter	Short	316.6	Short	Oddball
13	502.8	longer	Long	583.3	Short	Oddball
13	569.7	longer	Long	491.6	Long	Oddball
13	619	shorter	Short	308.3	Long	Oddball
13	732.3	shorter	Long	416.6	Short	Oddball
13	828.9	shorter	Long	316.6	Long	Oddball
13	473.2	shorter	Long	333.3	Long	Oddball
13	371.9	longer	Long	533.3	Long	Oddball
13	295.1	longer	Short	458.3	Long	Oddball
13	182.3	longer	Short	433.3	Short	Oddball
13	1749.6	longer	Long	500	Short	Oddball
13	804	shorter	Short	391.6	Long	Oddball
13	814.7	longer	Long	600	Short	Oddball
13	780.6	shorter	Long	308.3	Long	Oddball
13	1646.8	longer	Short	675	Long	Oddball
13	584	shorter	Long	391.6	Short	Oddball
13	399.5	longer	Short	533.3	Long	Oddball
13	729.8	shorter	Long	408.3	Short	Oddball
14	1858.4	longer	Short	333.3	Short	Oddball
14	1760	longer	Short	500	Short	Oddball
14	832	longer	Short	541.6	Short	Oddball
14	1019.4	longer	Short	383.2	Short	Oddball
14	761.5	longer	Short	533.3	Short	Oddball
14	982	longer	Long	591.7	Short	Oddball
14	885.5	longer	Short	333.3	Long	Oddball
14	440	longer	Long	316.6	Short	Oddball
14	394.8	longer	Short	600	Long	Oddball
14	461.8	longer	Long	400	Short	Oddball
14	1068	longer	Long	650	Long	Oddball
14	328.9	longer	Long	475	Long	Oddball
14	873.6	longer	Short	558.3	Long	Oddball
14	304.9	longer	Long	408.3	Short	Oddball
14	445.1	longer	Short	300	Long	Oddball
14	94.2	longer	Short	433.3	Short	Oddball
14	449.1	longer	Short	541.6	Short	Oddball
14	353.9	longer	Short	433.3	Short	Oddball
14	408.2	longer	Long	358.3	Short	Oddball
14	420.8	longer	Long	341.6	Long	Oddball
14	331.3	longer	Long	683.3	Long	Oddball
14	466.2	longer	Short	408.3	Long	Oddball
14	874.1	longer	Long	600	Short	Oddball
14	1455.8	longer	Short	483.3	Long	Oddball
14	525.8	longer	Short	500	Short	Oddball
14	30.3	longer	Short	366.6	Short	Oddball
14	307.3	longer	Long	316.6	Short	Oddball
14	945.8	longer	Short	633.3	Long	Oddball
14	1973.2	longer	Long	633.3	Short	Oddball
14	438.2	longer	Short	508.3	Long	Oddball
14	845.8	longer	Long	641.7	Short	Oddball
14	2139.8	longer	Short	308.3	Long	Oddball
14	213.9	longer	Long	675	Short	Oddball
14	2568.4	longer	Short	633.3	Long	Oddball
14	2559.8	longer	Short	541.6	Short	Oddball
14	375	longer	Long	325	Short	Oddball
14	648.4	longer	Short	691.7	Long	Oddball
14	312.2	longer	Short	466.6	Short	Oddball
14	453	longer	Short	475	Short	Oddball
14	151.3	longer	Long	358.3	Short	Oddball
14	472.8	longer	Short	316.6	Long	Oddball
14	814.4	longer	Long	658.3	Short	Oddball
14	1013.1	longer	Short	525	Long	Oddball
14	1152.3	longer	Long	575	Short	Oddball
14	608.2	longer	Long	316.6	Long	Oddball
14	47.1	longer	Long	683.3	Long	Oddball
14	865.4	longer	Long	566.7	Long	Oddball
14	592.4	longer	Short	458.3	Long	Oddball
14	578.7	longer	Long	416.6	Short	Oddball
14	491.9	longer	Long	458.3	Long	Oddball
14	377.2	longer	Long	441.6	Long	Oddball
14	113.8	longer	Long	675	Long	Oddball
14	960.7	longer	Long	583.3	Long	Oddball
14	681.1	longer	Long	633.3	Short	Oddball
14	932.3	longer	Long	508.3	Long	Oddball
14	542.6	longer	Long	475	Long	Oddball
14	349.2	longer	Long	358.3	Long	Oddball
14	1590.3	longer	Short	325	Long	Oddball
14	772.8	longer	Long	508.3	Short	Oddball
14	517.2	longer	Short	525	Long	Oddball
14	242	longer	Short	466.6	Short	Oddball
14	2385.5	longer	Long	433.3	Short	Oddball
14	497	longer	Long	491.6	Long	Oddball
14	338.6	longer	Long	533.3	Long	Oddball
14	532.4	longer	Short	325	Long	Oddball
14	420.3	longer	Long	333.3	Short	Oddball
14	310.9	longer	Long	583.3	Long	Oddball
14	380.7	longer	Short	450	Long	Oddball
14	519.9	longer	Short	650	Short	Oddball
14	601.6	longer	Short	341.6	Short	Oddball
14	283.6	longer	Long	416.6	Short	Oddball
14	318.2	longer	Long	516.6	Long	Oddball
14	311.5	longer	Long	516.6	Long	Oddball
14	305.3	longer	Short	550	Long	Oddball
14	726.5	longer	Long	633.3	Short	Oddball
14	875.3	longer	Short	458.3	Long	Oddball
14	444.5	longer	Long	558.3	Short	Oddball
14	928.8	longer	Long	516.6	Long	Oddball
14	662.3	longer	Long	400	Long	Oddball
14	552.9	longer	Long	341.6	Long	Oddball
14	421	longer	Short	450	Long	Oddball
14	433.2	longer	Short	383.3	Short	Oddball
14	683	longer	Short	425	Short	Oddball
14	977.8	longer	Short	450	Short	Oddball
14	920.7	longer	Long	316.6	Short	Oddball
14	803.2	longer	Long	483.3	Long	Oddball
14	448.3	longer	Short	375	Long	Oddball
14	336.6	longer	Long	416.6	Short	Oddball
14	366.9	longer	Long	575	Long	Oddball
14	312.7	longer	Short	491.6	Long	Oddball
14	357.3	longer	Long	641.7	Short	Oddball
14	651.9	longer	Long	341.6	Long	Oddball
14	535.3	longer	Short	566.6	Long	Oddball
14	5106.1	longer	Long	458.3	Short	Oddball
14	944.4	longer	Short	633.3	Long	Oddball
14	303.3	longer	Long	550	Short	Oddball
14	1465.5	longer	Long	508.3	Long	Oddball
14	1226.5	longer	Short	408.3	Long	Oddball
14	824.9	longer	Short	316.6	Short	Oddball
14	1456	longer	Short	500	Short	Oddball
14	462.1	longer	Short	300	Short	Oddball
14	538.5	longer	Short	533.3	Short	Oddball
14	585.7	longer	Short	391.6	Short	Oddball
14	213.1	longer	Short	633.3	Short	Oddball
14	512.6	longer	Short	408.3	Short	Oddball
14	529.5	longer	Short	375	Short	Oddball
14	331.6	longer	Short	525	Short	Oddball
14	856.2	longer	Long	625	Short	Oddball
14	216.6	longer	Short	616.7	Short	Oddball
14	489.1	longer	Short	475	Short	Oddball
14	367.2	longer	Short	666.7	Short	Oddball
14	831.5	longer	Long	491.6	Short	Oddball
14	2140.6	longer	Long	508.3	Long	Oddball
14	494.7	longer	Long	666.7	Long	Oddball
14	312.6	longer	Short	366.6	Long	Oddball
14	845.1	longer	Long	641.7	Short	Oddball
14	4272.4	longer	Short	575	Long	Oddball
14	2383.1	longer	Short	658.3	Short	Oddball
14	402.7	longer	Short	625	Short	Oddball
14	545.8	longer	Short	525	Short	Oddball
14	656.4	longer	Long	558.3	Short	Oddball
14	649.6	longer	Long	583.3	Long	Oddball
14	323.5	longer	Long	566.6	Long	Oddball
14	841.1	longer	Long	400	Long	Oddball
14	445.4	longer	Long	316.6	Long	Oddball
14	547.6	longer	Long	666.7	Long	Oddball
14	773.2	longer	Long	683.3	Long	Oddball
14	1118.6	longer	Short	500	Long	Oddball
14	1532.6	longer	Short	633.3	Short	Oddball
14	3291.3	longer	Long	358.3	Short	Oddball
14	2105.9	longer	Long	600	Long	Oddball
14	1830.9	longer	Long	633.3	Long	Oddball
14	1701	longer	Long	683.3	Long	Oddball
14	5717.8	longer	Short	575	Long	Oddball
14	267.9	longer	Long	583.3	Short	Oddball
14	511.7	longer	Short	541.7	Long	Oddball
14	733.3	longer	Long	616.7	Short	Oddball
14	458.5	longer	Long	600	Long	Oddball
14	292.3	longer	Short	400	Long	Oddball
14	836.1	longer	Short	616.7	Short	Oddball
14	1508.6	longer	Long	616.7	Short	Oddball
14	918.3	longer	Short	350	Long	Oddball
14	744.8	longer	Short	525	Short	Oddball
14	971.8	longer	Short	483.3	Short	Oddball
14	1611.6	longer	Short	341.6	Short	Oddball
14	1038.3	longer	Short	425	Short	Oddball
14	638.5	longer	Long	425	Short	Oddball
14	1602.9	longer	Short	558.3	Long	Oddball
14	353.1	longer	Long	308.3	Short	Oddball
14	1810.6	longer	Long	675	Long	Oddball
14	285.7	longer	Long	575	Long	Oddball
14	725.6	longer	Long	583.3	Long	Oddball
14	1134.7	longer	Short	350	Long	Oddball
14	563.6	longer	Long	608.3	Short	Oddball
14	505	longer	Short	608.3	Long	Oddball
14	493.8	longer	Short	683.3	Short	Oddball
14	836.3	longer	Long	608.3	Short	Oddball
14	465.1	longer	Short	350	Long	Oddball
14	268	longer	Short	375	Short	Oddball
14	973.2	longer	Long	366.6	Short	Oddball
14	1565.7	longer	Short	325	Long	Oddball
14	429.1	longer	Long	508.3	Short	Oddball
14	500.9	longer	Short	483.3	Long	Oddball
14	302.5	longer	Short	566.7	Long	Oddball
14	312.8	longer	Long	308.3	Short	Oddball
14	998.4	longer	Long	416.6	Long	Oddball
14	1057.8	longer	Short	425	Long	Oddball
14	503	longer	Long	475	Short	Oddball
14	529.6	longer	Long	500	Long	Oddball
14	540	longer	Short	516.6	Long	Oddball
14	407.1	longer	Short	691.7	Short	Oddball
14	829.1	longer	Long	308.3	Short	Oddball
14	3197.7	longer	Short	658.3	Long	Oddball
14	1042.2	longer	Short	591.7	Short	Oddball
14	385.3	longer	Short	483.3	Short	Oddball
14	386.8	longer	Short	483.3	Short	Oddball
14	328.4	longer	Long	541.6	Short	Oddball
14	1178	longer	Long	300	Long	Oddball
14	1195.2	longer	Long	458.3	Long	Oddball
14	2016.9	longer	Short	366.6	Long	Oddball
14	1079.3	longer	Long	683.3	Short	Oddball
14	1477.8	longer	Long	425	Long	Oddball
14	922.6	longer	Long	666.7	Long	Oddball
14	2928.2	longer	Short	641.7	Long	Oddball
14	494.6	longer	Long	575	Short	Oddball
14	931.1	longer	Long	658.3	Long	Oddball
14	716.7	longer	Long	300	Long	Oddball
14	1946.1	longer	Short	450	Long	Oddball
14	865.1	longer	Short	383.3	Short	Oddball
14	221.9	longer	Long	683.3	Short	Oddball
14	586.5	longer	Short	375	Long	Oddball
14	15304.8	longer	Long	308.3	Short	Oddball
14	1164	longer	Long	650	Long	Oddball
14	307.8	longer	Long	508.3	Long	Oddball
14	1105	longer	Short	466.6	Long	Oddball
14	315.9	longer	Long	491.6	Short	Oddball
14	503.8	longer	Long	450	Long	Oddball
14	310.9	longer	Short	625	Long	Oddball
14	450.9	longer	Long	458.3	Short	Oddball
14	497.1	longer	Long	458.3	Long	Oddball
14	1115.9	longer	Short	541.6	Long	Oddball
14	303.1	longer	Long	466.6	Short	Oddball
14	265.6	longer	Short	541.6	Long	Oddball
14	294.7	longer	Short	508.3	Short	Oddball
14	459	longer	Short	308.3	Short	Oddball
14	441	longer	Short	691.7	Short	Oddball
14	519.6	longer	Long	658.3	Short	Oddball
14	2005.2	longer	Long	408.3	Long	Oddball
14	1262.6	longer	Long	625	Long	Oddball
14	838.6	longer	Short	441.6	Long	Oddball
14	576.4	longer	Short	625	Short	Oddball
14	362.2	longer	Short	483.3	Short	Oddball
14	881.3	longer	Short	366.6	Short	Oddball
14	807.7	longer	Short	466.6	Short	Oddball
14	1158.1	longer	Short	333.3	Short	Oddball
14	2178.9	longer	Long	583.3	Short	Oddball
14	1758.2	longer	Short	441.6	Long	Oddball
14	558.9	longer	Short	325	Short	Oddball
14	326.9	longer	Long	466.6	Long	Oddball
14	1028.7	longer	Short	433.3	Long	Oddball
14	476.4	longer	Short	483.3	Short	Oddball
14	1061.2	longer	Short	408.3	Short	Oddball
14	606.1	longer	Long	383.3	Short	Oddball
14	2889.6	longer	Long	575	Long	Oddball
14	809.6	longer	Long	575	Long	Oddball
14	1293.1	longer	Long	566.7	Long	Oddball
14	1100.2	longer	Short	433.3	Long	Oddball
14	1968.2	longer	Short	500	Short	Oddball
14	511.2	longer	Short	558.3	Short	Oddball
14	786.3	longer	Short	316.6	Short	Oddball
14	1943	longer	Short	600	Short	Oddball
14	429.2	longer	Long	366.6	Short	Oddball
14	522.4	longer	Long	308.3	Long	Oddball
14	4364.1	longer	Short	341.6	Long	Oddball
14	627.6	longer	Short	350	Short	Oddball
14	869.8	longer	Long	583.3	Short	Oddball
14	660.3	longer	Long	633.3	Long	Oddball
14	339.7	longer	Short	658.3	Long	Oddball
14	589.3	longer	Long	491.6	Short	Oddball
14	1675.9	longer	Long	516.6	Long	Oddball
14	861	longer	Long	558.3	Long	Oddball
14	554.5	longer	Short	308.3	Long	Oddball
14	1197.3	longer	Long	441.6	Short	Oddball
14	2149.4	longer	Short	308.3	Long	Oddball
14	356.8	longer	Long	525	Short	Oddball
14	4032.9	longer	Long	608.3	Long	Oddball
14	751.1	longer	Short	308.3	Long	Oddball
14	324.5	longer	Short	616.7	Short	Oddball
14	379	longer	Short	616.7	Short	Oddball
14	2551.4	longer	Short	416.6	Short	Oddball
14	3182.7	longer	Long	525	Short	Oddball
14	8495.6	longer	Short	483.3	Long	Oddball
14	2701.9	longer	Short	433.3	Short	Oddball
14	3741.2	longer	Long	375	Short	Oddball
14	1404.3	longer	Short	375	Long	Oddball
14	747.1	longer	Short	333.3	Short	Oddball
14	1551.9	longer	Long	600	Short	Oddball
14	1665	longer	Long	683.3	Long	Oddball
14	1771.4	longer	Long	541.6	Long	Oddball
14	1131.5	longer	Long	491.6	Long	Oddball
14	730.6	longer	Short	600	Long	Oddball
14	483.2	longer	Long	525	Short	Oddball
14	612.4	longer	Long	350	Long	Oddball
14	14083	longer	Short	516.6	Long	Oddball
14	2989.2	longer	Short	341.6	Short	Oddball
14	504.2	longer	Long	400	Short	Oddball
14	930.6	longer	Short	541.7	Long	Oddball
14	3603.1	longer	Long	525	Short	Oddball
14	429.3	longer	Short	441.6	Long	Oddball
14	2699.7	longer	Short	316.6	Short	Oddball
14	462.4	longer	Long	491.6	Short	Oddball
14	6013.8	longer	Long	416.6	Long	Oddball
14	412.4	longer	Short	316.6	Long	Oddball
14	1159.9	longer	Short	691.7	Short	Oddball
14	335.1	longer	Long	525	Short	Oddball
14	611.6	longer	Short	658.3	Long	Oddball
14	333.4	longer	Short	650	Short	Oddball
14	458.7	longer	Long	400	Short	Oddball
14	26600.8	longer	Long	625	Long	Oddball
14	446.7	longer	Long	658.3	Long	Oddball
14	520.3	longer	Long	583.3	Long	Oddball
14	550.9	longer	Long	583.3	Long	Oddball
14	1105.3	longer	Short	691.7	Long	Oddball
14	178.4	longer	Short	375	Short	Oddball
14	1017.2	longer	Short	558.3	Short	Oddball
14	822.6	longer	Short	350	Short	Oddball
14	1217.3	longer	Short	616.7	Short	Oddball
14	1113.4	longer	Short	683.3	Short	Oddball
14	480.8	longer	Short	408.3	Short	Oddball
14	2458.2	longer	Short	591.7	Short	Oddball
14	340.6	longer	Long	341.6	Short	Oddball
14	336.2	longer	Long	433.3	Long	Oddball
14	735.4	longer	Short	391.6	Long	Oddball
14	184.9	longer	Long	691.7	Short	Oddball
14	607.2	longer	Long	325	Long	Oddball
14	1818.3	longer	Short	416.6	Long	Oddball
14	2963.5	longer	Short	650	Short	Oddball
14	699.5	longer	Long	500	Short	Oddball
14	1004.1	longer	Long	550	Long	Oddball
14	930.8	longer	Short	533.3	Long	Oddball
14	1588.9	longer	Short	525	Short	Oddball
14	504	longer	Long	600	Short	Oddball
14	1566.1	longer	Short	650	Long	Oddball
14	758.6	longer	Long	483.3	Short	Oddball
14	298.8	longer	Long	400	Long	Oddball
14	328.6	longer	Short	658.3	Long	Oddball
14	318.4	longer	Short	433.3	Short	Oddball
14	751.7	longer	Long	516.6	Short	Oddball
14	343.3	longer	Long	325	Long	Oddball
14	534.1	longer	Short	591.7	Long	Oddball
14	1525.5	longer	Short	583.3	Short	Oddball
14	504.3	longer	Long	666.7	Short	Oddball
14	746.9	longer	Long	500	Long	Oddball
14	1094.4	longer	Long	433.3	Long	Oddball
14	1162.9	longer	Long	458.3	Long	Oddball
14	281.8	longer	Long	333.3	Long	Oddball
14	161.8	longer	Long	591.6	Long	Oddball
14	1268.9	longer	Short	466.6	Long	Oddball
14	375.8	longer	Long	525	Short	Oddball
14	678.4	longer	Long	325	Long	Oddball
14	271.6	longer	Long	358.3	Long	Oddball
14	524.2	longer	Long	683.3	Long	Oddball
14	101.5	longer	Long	308.3	Long	Oddball
14	581	longer	Short	416.6	Long	Oddball
14	1306.8	longer	Short	383.3	Short	Oddball
14	1668.8	longer	Short	350	Short	Oddball
14	509.5	longer	Short	416.6	Short	Oddball
14	655.6	longer	Short	541.6	Short	Oddball
15	7056.5	shorter	Long	566.7	Long	Oddball
15	14232.2	longer	Long	600	Long	Oddball
15	4302.7	shorter	Short	483.3	Long	Oddball
15	6417.8	shorter	Short	316.6	Short	Oddball
15	6840.1	shorter	Long	475	Short	Oddball
15	2417.5	shorter	Long	383.3	Long	Oddball
15	2194	longer	Long	433.3	Long	Oddball
15	1980.6	longer	Short	441.6	Long	Oddball
15	2702.6	longer	Short	675	Short	Oddball
15	1204.4	longer	Long	616.7	Short	Oddball
15	1345.9	longer	Short	566.7	Long	Oddball
15	851.4	longer	Long	683.3	Short	Oddball
15	846.9	shorter	Short	366.6	Long	Oddball
15	4729.4	longer	Short	400	Short	Oddball
15	708.8	longer	Short	683.3	Short	Oddball
15	1984.9	shorter	Short	491.7	Short	Oddball
15	694.3	shorter	Short	383.3	Short	Oddball
15	772.7	longer	Long	616.7	Short	Oddball
15	761.3	longer	Long	583.3	Long	Oddball
15	929.8	longer	Short	533.3	Long	Oddball
15	579.4	shorter	Long	300	Short	Oddball
15	1551.1	shorter	Long	400	Long	Oddball
15	683.4	longer	Long	608.3	Long	Oddball
15	735	longer	Long	491.6	Long	Oddball
15	833	longer	Long	483.3	Long	Oddball
15	1129.4	longer	Short	658.3	Long	Oddball
15	1039.9	shorter	Short	416.6	Short	Oddball
15	779.9	shorter	Long	333.3	Short	Oddball
15	371.4	shorter	Short	341.6	Long	Oddball
15	414.3	longer	Short	466.6	Short	Oddball
15	2096.3	longer	Long	608.3	Short	Oddball
15	250.1	longer	Long	525	Long	Oddball
15	247.5	longer	Long	683.3	Long	Oddball
15	371.7	shorter	Short	358.3	Long	Oddball
15	492.6	shorter	Short	316.6	Short	Oddball
15	702.8	shorter	Short	358.3	Short	Oddball
15	512.5	shorter	Long	325	Short	Oddball
15	237.7	longer	Short	466.6	Long	Oddball
15	2911.5	longer	Short	625	Short	Oddball
15	1408.3	shorter	Long	333.3	Short	Oddball
15	399.5	longer	Long	675	Long	Oddball
15	589.8	shorter	Short	350	Long	Oddball
15	265.8	longer	Long	583.3	Short	Oddball
15	289.5	longer	Long	608.3	Long	Oddball
15	386.3	longer	Short	600	Long	Oddball
15	3093.6	longer	Long	400	Short	Oddball
15	362.9	longer	Short	675	Long	Oddball
15	1766.3	longer	Long	425	Short	Oddball
15	288	longer	Short	691.7	Long	Oddball
15	394.9	shorter	Short	350	Short	Oddball
15	304.9	longer	Long	525	Short	Oddball
15	1191.4	longer	Short	641.7	Long	Oddball
15	289	longer	Long	633.3	Short	Oddball
15	1120.4	shorter	Long	333.3	Long	Oddball
15	2196.8	shorter	Short	675	Long	Oddball
15	1172.9	shorter	Short	308.3	Short	Oddball
15	391.5	shorter	Long	633.3	Short	Oddball
15	408.7	longer	Short	683.3	Long	Oddball
15	701.9	shorter	Short	366.6	Short	Oddball
15	310.9	longer	Long	541.7	Short	Oddball
15	221.9	longer	Long	583.3	Long	Oddball
15	566.6	shorter	Long	433.3	Long	Oddball
15	1787.6	longer	Long	375	Long	Oddball
15	3718.2	longer	Short	650	Long	Oddball
15	1016	shorter	Long	300	Short	Oddball
15	303.8	longer	Short	691.7	Long	Oddball
15	669.3	shorter	Short	466.6	Short	Oddball
15	650.6	shorter	Long	466.6	Short	Oddball
15	300.5	longer	Short	608.3	Long	Oddball
15	309.2	longer	Long	550	Short	Oddball
15	184.9	longer	Long	666.7	Long	Oddball
15	292.2	longer	Long	600	Long	Oddball
15	523.4	longer	Short	633.3	Long	Oddball
15	640.3	longer	Short	666.7	Short	Oddball
15	341.3	shorter	Long	300	Short	Oddball
15	2104.3	shorter	Long	450	Long	Oddball
15	460.7	longer	Short	491.6	Long	Oddball
15	231.9	longer	Short	566.7	Short	Oddball
15	620.8	longer	Short	550	Short	Oddball
15	476.3	shorter	Short	300	Short	Oddball
15	488.8	shorter	Short	316.6	Short	Oddball
15	805.5	longer	Long	666.7	Short	Oddball
15	606.3	shorter	Short	483.3	Long	Oddball
15	625.4	shorter	Long	391.6	Short	Oddball
15	436.6	longer	Short	400	Long	Oddball
15	259.2	longer	Long	666.7	Short	Oddball
15	506.8	shorter	Short	458.3	Long	Oddball
15	284	longer	Short	575	Short	Oddball
15	277.7	shorter	Long	341.6	Short	Oddball
15	150.9	longer	Short	600	Long	Oddball
15	327.1	shorter	Short	350	Short	Oddball
15	175.2	longer	Long	541.6	Short	Oddball
15	572.2	shorter	Long	366.6	Long	Oddball
15	972.8	shorter	Short	525	Long	Oddball
15	1382.2	longer	Short	500	Short	Oddball
15	686.3	shorter	Short	316.6	Short	Oddball
15	450.3	shorter	Long	483.3	Short	Oddball
15	587.9	longer	Short	616.7	Long	Oddball
15	1046.2	longer	Long	425	Short	Oddball
15	2651.7	shorter	Long	683.3	Long	Oddball
15	249.6	longer	Long	666.7	Long	Oddball
15	841.2	longer	Long	625	Long	Oddball
15	881	shorter	Short	466.6	Long	Oddball
15	949.5	longer	Short	516.6	Short	Oddball
15	307.5	longer	Long	566.7	Short	Oddball
15	691.2	shorter	Long	566.7	Long	Oddball
15	278.8	longer	Long	683.3	Long	Oddball
15	104	longer	Short	600	Long	Oddball
15	343.8	longer	Short	550	Long	Oddball
15	271	shorter	Short	383.3	Short	Oddball
15	224.4	shorter	Long	366.6	Short	Oddball
15	173.4	longer	Long	516.7	Long	Oddball
15	1014.1	longer	Long	683.3	Long	Oddball
15	1118.9	shorter	Short	475	Long	Oddball
15	598.1	shorter	Short	408.3	Short	Oddball
15	814.1	shorter	Long	475	Short	Oddball
15	459.6	shorter	Short	358.3	Long	Oddball
15	328.8	shorter	Short	316.6	Short	Oddball
15	38	longer	Short	650	Short	Oddball
15	473.6	shorter	Short	383.3	Short	Oddball
15	426.4	longer	Short	608.3	Short	Oddball
15	776.1	longer	Long	500	Short	Oddball
15	295.5	shorter	Long	308.3	Long	Oddball
15	638.2	longer	Long	408.3	Long	Oddball
15	900.4	shorter	Short	316.6	Long	Oddball
15	86.5	longer	Short	550	Short	Oddball
15	480.1	longer	Short	583.3	Short	Oddball
15	1491.1	shorter	Long	316.6	Short	Oddball
15	436.7	shorter	Long	333.3	Long	Oddball
15	1088.9	shorter	Short	366.6	Long	Oddball
15	797.1	shorter	Short	316.6	Short	Oddball
15	323.1	shorter	Long	525	Short	Oddball
15	433.6	shorter	Short	425	Long	Oddball
15	390.5	shorter	Short	350	Short	Oddball
15	533.9	longer	Long	491.6	Short	Oddball
15	431.2	shorter	Long	500	Long	Oddball
15	668.7	shorter	Short	541.6	Long	Oddball
15	291.4	longer	Long	633.3	Short	Oddball
15	363.1	longer	Long	583.3	Long	Oddball
15	304.1	shorter	Long	383.3	Long	Oddball
15	418.7	longer	Short	541.7	Long	Oddball
15	706.3	shorter	Long	458.3	Short	Oddball
15	322.3	longer	Long	366.6	Long	Oddball
15	172.4	longer	Long	500	Long	Oddball
15	391.7	longer	Long	616.7	Long	Oddball
15	485.8	shorter	Long	325	Long	Oddball
15	299	longer	Short	491.6	Long	Oddball
15	352.9	longer	Short	658.3	Short	Oddball
15	179.6	shorter	Long	450	Short	Oddball
15	180.1	longer	Short	316.6	Long	Oddball
15	215.8	longer	Long	600	Short	Oddball
15	193.1	longer	Short	658.3	Long	Oddball
15	93.3	longer	Short	608.3	Short	Oddball
15	501.5	shorter	Short	408.3	Short	Oddball
15	200.8	longer	Long	683.3	Short	Oddball
15	269.1	longer	Short	600	Long	Oddball
15	712.3	longer	Short	358.3	Short	Oddball
15	234.6	longer	Long	500	Short	Oddball
15	216.3	longer	Long	491.6	Long	Oddball
15	209.6	longer	Short	658.3	Long	Oddball
15	57.6	longer	Long	658.3	Short	Oddball
15	1107.5	longer	Short	400	Long	Oddball
15	497.7	longer	Long	600	Short	Oddball
15	185.1	longer	Short	508.3	Long	Oddball
15	273.7	shorter	Short	308.3	Short	Oddball
15	64.3	longer	Short	666.7	Short	Oddball
15	196.9	shorter	Short	333.3	Short	Oddball
15	519.1	longer	Short	458.3	Short	Oddball
15	365	shorter	Short	441.6	Short	Oddball
15	229.5	shorter	Short	333.3	Short	Oddball
15	465.1	shorter	Short	391.6	Short	Oddball
15	235.1	longer	Long	558.3	Short	Oddball
15	380.1	shorter	Long	608.3	Long	Oddball
15	206.8	longer	Long	625	Long	Oddball
15	446.2	longer	Long	683.3	Long	Oddball
15	563.2	shorter	Long	300	Long	Oddball
15	465.4	longer	Short	591.7	Long	Oddball
15	418.1	shorter	Long	383.3	Short	Oddball
15	353.8	shorter	Long	458.3	Long	Oddball
15	2291.6	longer	Short	508.3	Long	Oddball
15	3732.2	shorter	Short	591.7	Short	Oddball
15	2881.7	shorter	Short	625	Short	Oddball
15	474.2	shorter	Long	375	Short	Oddball
15	3428	longer	Short	583.3	Long	Oddball
15	273.4	shorter	Long	300	Short	Oddball
15	1643	longer	Short	400	Long	Oddball
15	341.4	longer	Short	600	Short	Oddball
15	671.7	longer	Long	466.6	Short	Oddball
15	149	longer	Long	666.7	Long	Oddball
15	415.1	longer	Long	666.7	Long	Oddball
15	317.7	longer	Long	691.7	Long	Oddball
15	333.3	shorter	Short	400	Long	Oddball
15	27.7	longer	Long	575	Short	Oddball
15	239.9	longer	Short	575	Long	Oddball
15	300.5	shorter	Short	358.3	Short	Oddball
15	195.5	longer	Long	591.7	Short	Oddball
15	169.2	shorter	Long	333.3	Long	Oddball
15	498.9	longer	Long	458.3	Long	Oddball
15	1108.1	longer	Short	375	Long	Oddball
15	355.3	longer	Short	616.7	Short	Oddball
15	256	shorter	Long	400	Short	Oddball
15	355.7	shorter	Long	325	Long	Oddball
15	792.2	shorter	Short	441.6	Long	Oddball
15	274.6	shorter	Long	416.6	Short	Oddball
15	217.9	longer	Long	608.3	Long	Oddball
15	388	shorter	Long	400	Long	Oddball
15	838.9	shorter	Short	450	Long	Oddball
15	277.5	longer	Long	666.7	Short	Oddball
15	651	shorter	Short	491.6	Long	Oddball
15	556.9	shorter	Short	408.3	Short	Oddball
15	470.6	shorter	Long	466.6	Short	Oddball
15	190.4	longer	Short	641.7	Long	Oddball
15	474	longer	Short	425	Short	Oddball
15	439.7	longer	Long	450	Short	Oddball
15	376.4	longer	Long	416.6	Long	Oddball
15	174.7	longer	Long	533.3	Long	Oddball
15	361.3	longer	Short	666.7	Long	Oddball
15	274.5	longer	Short	516.6	Short	Oddball
15	220	longer	Long	533.3	Long	Oddball
15	41.2	longer	Short	558.3	Long	Oddball
15	476.6	shorter	Long	341.6	Short	Oddball
15	594.2	longer	Short	491.6	Long	Oddball
15	446.2	shorter	Long	375	Short	Oddball
15	591.5	longer	Long	391.6	Long	Oddball
15	1069	longer	Short	575	Long	Oddball
15	459.2	longer	Short	483.3	Short	Oddball
15	272.7	shorter	Short	308.3	Short	Oddball
15	271.6	longer	Short	666.7	Short	Oddball
15	209.3	shorter	Long	358.3	Short	Oddball
15	116	longer	Long	591.7	Long	Oddball
15	1074.3	longer	Short	433.3	Long	Oddball
15	738.9	shorter	Long	575	Short	Oddball
15	143.5	longer	Long	616.7	Long	Oddball
15	470.2	shorter	Long	358.3	Long	Oddball
15	526.1	longer	Short	441.6	Long	Oddball
15	162.1	longer	Long	641.7	Short	Oddball
15	11.1	longer	Long	683.3	Long	Oddball
15	354.6	longer	Long	475	Long	Oddball
15	498.9	longer	Long	508.3	Long	Oddball
15	501.4	longer	Short	341.6	Long	Oddball
15	1090.3	longer	Short	683.3	Short	Oddball
15	2374.5	longer	Long	666.7	Short	Oddball
15	302	longer	Long	500	Long	Oddball
15	280.6	shorter	Short	341.6	Long	Oddball
15	659.8	longer	Short	350	Short	Oddball
15	122.7	longer	Short	675	Short	Oddball
15	220.9	longer	Short	533.3	Short	Oddball
15	422.3	shorter	Long	416.6	Short	Oddball
15	568.1	shorter	Short	441.6	Long	Oddball
15	383	longer	Short	566.7	Short	Oddball
15	127	longer	Long	483.3	Short	Oddball
15	1020.1	shorter	Long	416.6	Long	Oddball
15	383.9	longer	Short	591.7	Long	Oddball
15	206.1	longer	Short	566.7	Short	Oddball
15	307.3	longer	Short	575	Short	Oddball
15	412.5	longer	Short	566.7	Short	Oddball
15	307.1	shorter	Short	533.3	Short	Oddball
15	652.3	longer	Short	366.6	Short	Oddball
15	145.9	longer	Long	675	Short	Oddball
15	351.6	shorter	Long	383.3	Long	Oddball
15	723.5	shorter	Short	458.3	Long	Oddball
15	318.1	shorter	Short	316.6	Short	Oddball
15	127.6	longer	Short	550	Short	Oddball
15	854.6	shorter	Short	408.3	Short	Oddball
15	457.8	shorter	Long	333.3	Short	Oddball
15	72.5	longer	Long	641.7	Long	Oddball
15	98.6	longer	Long	550	Long	Oddball
15	184.6	longer	Long	616.7	Long	Oddball
15	891.2	shorter	Short	458.3	Long	Oddball
15	243.7	longer	Short	600	Short	Oddball
15	232	longer	Long	516.6	Short	Oddball
15	217.7	longer	Long	591.7	Long	Oddball
15	308.4	shorter	Long	383.3	Long	Oddball
15	71.8	longer	Long	466.6	Short	Oddball
15	479.5	longer	Long	408.3	Long	Oddball
15	405.9	shorter	Long	433.3	Long	Oddball
15	1055.4	longer	Short	466.6	Long	Oddball
15	365.4	longer	Long	466.6	Short	Oddball
15	316.9	shorter	Short	350	Long	Oddball
15	198.8	longer	Short	541.7	Short	Oddball
15	452.7	shorter	Short	358.3	Short	Oddball
15	615.6	shorter	Short	383.3	Short	Oddball
15	939.8	longer	Short	383.3	Short	Oddball
15	632.6	shorter	Short	450	Short	Oddball
15	234.8	shorter	Short	416.6	Short	Oddball
15	666.1	longer	Long	650	Short	Oddball
15	294.8	longer	Long	483.3	Long	Oddball
15	1033	longer	Short	558.3	Long	Oddball
15	183	longer	Long	483.3	Short	Oddball
15	268.7	longer	Long	541.7	Long	Oddball
15	225.7	longer	Long	475	Long	Oddball
15	323.4	shorter	Long	400	Long	Oddball
15	879.3	shorter	Short	491.6	Long	Oddball
15	242	longer	Long	525	Short	Oddball
15	487.8	longer	Short	516.6	Long	Oddball
15	579.7	shorter	Short	325	Short	Oddball
15	555.6	shorter	Short	533.3	Short	Oddball
15	132.9	longer	Long	683.3	Short	Oddball
15	207.9	longer	Long	658.3	Long	Oddball
15	1325.5	shorter	Short	358.3	Long	Oddball
15	1168.7	shorter	Long	458.3	Short	Oddball
15	198.2	longer	Short	600	Long	Oddball
15	352.3	longer	Long	425	Short	Oddball
15	144.3	longer	Long	516.6	Long	Oddball
15	170.8	longer	Short	700	Long	Oddball
15	239.4	longer	Short	625	Short	Oddball
15	471.3	shorter	Short	475	Short	Oddball
15	130.2	longer	Short	566.7	Short	Oddball
15	992.2	shorter	Long	391.6	Short	Oddball
15	343.2	shorter	Long	300	Long	Oddball
15	621.7	shorter	Short	400	Long	Oddball
15	81.3	longer	Short	600	Short	Oddball
15	123.8	longer	Short	566.7	Short	Oddball
15	457.2	shorter	Long	408.3	Short	Oddball
15	542.6	longer	Long	475	Long	Oddball
15	937.4	shorter	Short	491.6	Long	Oddball
15	592.8	shorter	Long	350	Short	Oddball
15	242.4	longer	Long	433.3	Long	Oddball
15	113.1	longer	Long	658.3	Long	Oddball
15	1028.3	shorter	Short	316.6	Long	Oddball
15	338.3	longer	Long	491.6	Short	Oddball
15	808	shorter	Long	391.6	Long	Oddball
15	289.1	longer	Short	666.7	Long	Oddball
15	116.2	longer	Long	508.3	Short	Oddball
15	452.6	shorter	Long	341.6	Long	Oddball
15	294.4	longer	Short	608.3	Long	Oddball
15	300.1	longer	Long	633.3	Short	Oddball
15	319	shorter	Short	533.3	Long	Oddball
16	1668.9	shorter	Long	475	Long	Oddball
16	1912.7	shorter	Short	341.6	Long	Oddball
16	2767.4	longer	Short	425	Short	Oddball
16	779.3	longer	Short	633.3	Short	Oddball
16	745.6	shorter	Long	533.3	Short	Oddball
16	2280.6	shorter	Long	350	Long	Oddball
16	949.3	shorter	Short	308.3	Long	Oddball
16	698.3	longer	Long	591.7	Short	Oddball
16	3373.7	shorter	Short	525	Long	Oddball
16	2839.4	shorter	Long	450	Short	Oddball
16	630.2	longer	Long	658.3	Long	Oddball
16	3546.6	shorter	Short	366.6	Long	Oddball
16	903.2	longer	Short	641.7	Short	Oddball
16	3889.1	shorter	Long	316.6	Short	Oddball
16	1209.4	longer	Long	566.7	Long	Oddball
16	1367.1	shorter	Long	316.6	Long	Oddball
16	2230.3	longer	Long	516.7	Long	Oddball
16	909	shorter	Short	308.3	Long	Oddball
16	1022.8	shorter	Short	350	Short	Oddball
16	632.5	longer	Long	408.3	Short	Oddball
16	1533.1	shorter	Long	516.6	Long	Oddball
16	833.8	longer	Short	650	Long	Oddball
16	177.3	longer	Short	683.3	Short	Oddball
16	1145.9	longer	Short	516.6	Short	Oddball
16	229	longer	Short	683.3	Short	Oddball
16	1926.3	longer	Long	408.3	Short	Oddball
16	971	longer	Short	658.3	Long	Oddball
16	146.6	shorter	Short	350	Short	Oddball
16	667.3	shorter	Long	308.3	Short	Oddball
16	605.9	shorter	Long	333.3	Long	Oddball
16	540.5	shorter	Short	341.6	Long	Oddball
16	1619.1	longer	Long	558.3	Short	Oddball
16	824.2	longer	Short	558.3	Long	Oddball
16	1186.8	longer	Long	575	Short	Oddball
16	4685.7	longer	Long	608.3	Long	Oddball
16	3570.1	longer	Short	300	Long	Oddball
16	7031.5	shorter	Short	391.6	Short	Oddball
16	1282.5	longer	Short	391.6	Short	Oddball
16	3095.3	longer	Long	658.3	Short	Oddball
[truncated: 6,478 more rows]
