# Supplementary material for: The expected oddball: effects of implicit and explicit positional expectation on duration perception
Source: Springer Nature journal article supplement (doi:10.1007/s00426-018-1093-5), 2018-09-12
Supplement: MOESM2 [file 16120394]

Subject	TTime	Response	Type	Interval	TypeN1	RT	Truth	FP	Experiment
10	14395	longer	True_Short	600	True_Short	1439.5	True	_Short	Oddball
10	19757	shorter	True_Short	341.6	True_Short	1975.7	True	_Short	Oddball
10	4060	longer	False_Long	608.3	True_Short	406	False	_Long	Oddball
10	24600	shorter	False_Short	433.3	False_Long	2460	False	_Short	Oddball
10	2696	longer	False_Long	641.7	False_Short	269.6	False	_Long	Oddball
10	1003	longer	False_Short	550	False_Long	100.3	False	_Short	Oddball
10	5925	shorter	True_Long	341.6	False_Short	592.5	True	_Long	Oddball
10	3293	longer	True_Long	533.3	True_Long	329.3	True	_Long	Oddball
10	7216	shorter	True_Short	450	True_Long	721.6	True	_Short	Oddball
10	148	longer	True_Long	500	True_Short	14.8	True	_Long	Oddball
10	403	longer	True_Long	500	True_Long	40.3	True	_Long	Oddball
10	5874	longer	False_Long	425	True_Long	587.4	False	_Long	Oddball
10	1153	longer	True_Long	566.7	False_Long	115.3	True	_Long	Oddball
10	5020	shorter	False_Short	600	True_Long	502	False	_Short	Oddball
10	974	longer	True_Long	558.3	False_Short	97.4	True	_Long	Oddball
10	13851	shorter	True_Short	500	True_Long	1385.1	True	_Short	Oddball
10	142	longer	True_Long	433.3	True_Short	14.2	True	_Long	Oddball
10	7319	shorter	True_Short	433.3	True_Long	731.9	True	_Short	Oddball
10	3991	shorter	True_Long	333.3	True_Short	399.1	True	_Long	Oddball
10	3141	shorter	True_Short	508.3	True_Long	314.1	True	_Short	Oddball
10	12519	longer	True_Long	591.7	True_Short	1251.9	True	_Long	Oddball
10	6129	shorter	False_Long	466.6	True_Long	612.9	False	_Long	Oddball
10	177	longer	True_Long	616.7	False_Long	17.7	True	_Long	Oddball
10	5375	shorter	True_Short	375	True_Long	537.5	True	_Short	Oddball
10	2571	shorter	True_Short	458.3	True_Short	257.1	True	_Short	Oddball
10	2249	shorter	True_Short	333.3	True_Short	224.9	True	_Short	Oddball
10	1623	shorter	True_Short	325	True_Short	162.3	True	_Short	Oddball
10	9277	longer	False_Long	650	True_Short	927.7	False	_Long	Oddball
10	2235	shorter	True_Long	425	False_Long	223.5	True	_Long	Oddball
10	2479	shorter	True_Short	350	True_Long	247.9	True	_Short	Oddball
10	2870	shorter	False_Short	366.6	True_Short	287	False	_Short	Oddball
10	5625	longer	True_Short	633.3	True_Long	562.5	True	_Short	Oddball
10	1879	shorter	False_Short	391.6	True_Short	187.9	False	_Short	Oddball
10	3198	longer	False_Long	466.6	False_Short	319.8	False	_Long	Oddball
10	5288	shorter	True_Short	441.6	False_Long	528.8	True	_Short	Oddball
10	7408	longer	True_Short	558.3	True_Short	740.8	True	_Short	Oddball
10	1718	longer	True_Short	666.7	True_Short	171.8	True	_Short	Oddball
10	4345	shorter	False_Short	450	True_Short	434.5	False	_Short	Oddball
10	4250	shorter	True_Long	350	False_Short	425	True	_Long	Oddball
10	3134	shorter	True_Short	350	True_Long	313.4	True	_Short	Oddball
10	2387	shorter	True_Short	341.6	True_Short	238.7	True	_Short	Oddball
10	6906	longer	False_Long	416.6	True_Short	690.6	False	_Long	Oddball
10	4536	shorter	True_Short	416.6	False_Long	453.6	True	_Short	Oddball
10	4973	longer	True_Long	600	True_Short	497.3	True	_Long	Oddball
10	7825	shorter	True_Long	325	True_Long	782.5	True	_Long	Oddball
10	4938	longer	True_Short	416.6	True_Long	493.8	True	_Short	Oddball
10	5063	longer	False_Long	541.7	True_Short	506.3	False	_Long	Oddball
10	5718	longer	True_Long	608.3	False_Long	571.8	True	_Long	Oddball
10	8825	shorter	True_Long	408.3	True_Long	882.5	True	_Long	Oddball
10	6793	shorter	False_Long	341.6	True_Long	679.3	False	_Long	Oddball
10	2590	longer	False_Short	616.7	False_Long	259	False	_Short	Oddball
10	5830	shorter	False_Short	425	False_Short	583	False	_Short	Oddball
10	4725	shorter	True_Long	325	False_Short	472.5	True	_Long	Oddball
10	4385	shorter	True_Short	566.7	True_Long	438.5	True	_Short	Oddball
10	3490	shorter	False_Long	350	True_Short	349	False	_Long	Oddball
10	5195	shorter	True_Long	333.3	False_Long	519.5	True	_Long	Oddball
10	4455	longer	True_Short	516.6	True_Long	445.5	True	_Short	Oddball
10	2972	longer	False_Short	650	True_Short	297.2	False	_Short	Oddball
10	2710	longer	True_Long	508.3	False_Short	271	True	_Long	Oddball
10	5874	longer	True_Short	608.3	True_Long	587.4	True	_Short	Oddball
10	4694	shorter	True_Short	550	True_Short	469.4	True	_Short	Oddball
10	7932	shorter	True_Long	383.3	True_Short	793.2	True	_Long	Oddball
10	7213	longer	True_Long	550	True_Long	721.3	True	_Long	Oddball
10	5100	shorter	True_Long	508.3	True_Long	510	True	_Long	Oddball
10	4867	longer	True_Long	516.6	True_Short	486.7	True	_Long	Oddball
10	3840	shorter	True_Short	466.6	True_Long	384	True	_Short	Oddball
10	8231	shorter	True_Long	583.3	True_Short	823.1	True	_Long	Oddball
10	7309	shorter	True_Long	433.3	True_Long	730.9	True	_Long	Oddball
10	2840	longer	False_Long	591.7	True_Long	284	False	_Long	Oddball
10	11455	shorter	False_Long	525	False_Long	1145.5	False	_Long	Oddball
10	5832	longer	True_Long	658.3	False_Long	583.2	True	_Long	Oddball
10	6765	longer	True_Short	666.7	True_Long	676.5	True	_Short	Oddball
10	6316	longer	True_Long	591.7	True_Short	631.6	True	_Long	Oddball
10	9676	shorter	True_Short	358.3	True_Long	967.6	True	_Short	Oddball
10	8422	shorter	False_Short	350	True_Short	842.2	False	_Short	Oddball
10	4352	longer	True_Short	516.6	False_Short	435.2	True	_Short	Oddball
10	4423	longer	False_Long	533.3	True_Short	442.3	False	_Long	Oddball
10	11044	shorter	True_Short	391.6	False_Long	1104.4	True	_Short	Oddball
10	500	longer	False_Short	641.7	True_Short	50	False	_Short	Oddball
10	5094	shorter	True_Short	450	False_Short	509.4	True	_Short	Oddball
10	6362	shorter	True_Long	466.6	True_Short	636.2	True	_Long	Oddball
10	9196	longer	False_Long	425	True_Long	919.6	False	_Long	Oddball
10	5797	longer	True_Long	525	False_Long	579.7	True	_Long	Oddball
10	7647	shorter	True_Short	383.3	True_Long	764.7	True	_Short	Oddball
10	3720	longer	True_Short	641.7	True_Short	372	True	_Short	Oddball
10	6337	shorter	True_Short	475	True_Short	633.7	True	_Short	Oddball
10	7598	shorter	True_Long	358.3	True_Short	759.8	True	_Long	Oddball
10	3399	shorter	False_Short	325	True_Long	339.9	False	_Short	Oddball
10	2697	longer	True_Long	566.7	False_Short	269.7	True	_Long	Oddball
10	5891	shorter	True_Short	333.3	True_Long	589.1	True	_Short	Oddball
10	5677	longer	True_Short	533.3	True_Short	567.7	True	_Short	Oddball
10	3628	shorter	False_Short	341.6	True_Short	362.8	False	_Short	Oddball
10	16016	shorter	True_Long	416.6	False_Short	1601.6	True	_Long	Oddball
10	6246	longer	True_Long	566.7	True_Long	624.6	True	_Long	Oddball
10	8680	longer	False_Long	433.3	True_Long	868	False	_Long	Oddball
10	4321	shorter	True_Long	375	False_Long	432.1	True	_Long	Oddball
10	8608	longer	False_Short	633.3	True_Long	860.8	False	_Short	Oddball
10	4106	longer	True_Long	675	True_Short	410.6	True	_Long	Oddball
10	5017	shorter	True_Long	458.3	True_Long	501.7	True	_Long	Oddball
10	2585	shorter	True_Long	325	True_Long	258.5	True	_Long	Oddball
10	11123	longer	True_Short	383.3	True_Long	1112.3	True	_Short	Oddball
10	2755	longer	True_Short	591.7	True_Short	275.5	True	_Short	Oddball
10	11480	shorter	False_Long	458.3	True_Short	1148	False	_Long	Oddball
10	5526	shorter	False_Short	325	False_Long	552.6	False	_Short	Oddball
10	2457	longer	False_Short	508.3	False_Short	245.7	False	_Short	Oddball
10	8241	shorter	True_Long	441.6	False_Short	824.1	True	_Long	Oddball
10	3758	longer	True_Short	366.6	True_Long	375.8	True	_Short	Oddball
10	3186	shorter	True_Long	400	True_Short	318.6	True	_Long	Oddball
10	371	longer	True_Short	633.3	True_Long	37.1	True	_Short	Oddball
10	2646	longer	True_Long	425	True_Short	264.6	True	_Long	Oddball
10	5640	shorter	True_Short	441.6	True_Long	564	True	_Short	Oddball
10	6529	longer	True_Short	600	True_Short	652.9	True	_Short	Oddball
10	2996	shorter	True_Short	566.7	True_Short	299.6	True	_Short	Oddball
10	10977	longer	True_Short	333.3	True_Short	1097.7	True	_Short	Oddball
10	1141	longer	False_Long	441.6	True_Short	114.1	False	_Long	Oddball
10	1546	shorter	True_Long	425	False_Long	154.6	True	_Long	Oddball
10	800	longer	True_Short	500	True_Long	80	True	_Short	Oddball
10	2392	longer	False_Long	491.6	True_Short	239.2	False	_Long	Oddball
10	8846	shorter	False_Short	416.6	False_Long	884.6	False	_Short	Oddball
10	5153	longer	True_Long	491.6	False_Short	515.3	True	_Long	Oddball
10	1157	longer	False_Short	658.3	True_Long	115.7	False	_Short	Oddball
10	3932	longer	False_Long	491.6	False_Short	393.2	False	_Long	Oddball
10	2213	longer	True_Long	450	False_Long	221.3	True	_Long	Oddball
10	3048	longer	False_Long	641.7	True_Long	304.8	False	_Long	Oddball
10	5133	shorter	True_Long	433.3	False_Long	513.3	True	_Long	Oddball
10	691	longer	True_Long	541.7	True_Long	69.1	True	_Long	Oddball
10	643	longer	True_Long	600	True_Long	64.3	True	_Long	Oddball
10	6554	shorter	True_Short	550	True_Long	655.4	True	_Short	Oddball
10	5247	shorter	False_Short	400	True_Short	524.7	False	_Short	Oddball
10	1231	shorter	True_Long	450	True_Long	123.1	True	_Long	Oddball
10	4256	shorter	True_Long	466.6	True_Long	425.6	True	_Long	Oddball
10	1033	longer	True_Short	616.7	True_Long	103.3	True	_Short	Oddball
10	3991	longer	False_Long	650	True_Short	399.1	False	_Long	Oddball
10	28050	longer	True_Short	633.3	False_Long	2805	True	_Short	Oddball
10	7291	longer	True_Short	475	True_Short	729.1	True	_Short	Oddball
10	4901	longer	True_Short	433.3	True_Short	490.1	True	_Short	Oddball
10	2518	longer	False_Short	650	True_Short	251.8	False	_Short	Oddball
10	253	longer	True_Long	558.3	False_Short	25.3	True	_Long	Oddball
10	3144	shorter	True_Short	533.3	True_Long	314.4	True	_Short	Oddball
10	1791	shorter	True_Short	458.3	True_Short	179.1	True	_Short	Oddball
10	3226	shorter	False_Long	383.3	True_Short	322.6	False	_Long	Oddball
10	2818	shorter	True_Long	450	False_Long	281.8	True	_Long	Oddball
10	855	longer	False_Short	616.7	True_Long	85.5	False	_Short	Oddball
10	3588	shorter	True_Short	466.6	False_Short	358.8	True	_Short	Oddball
10	1355	shorter	True_Short	408.3	True_Short	135.5	True	_Short	Oddball
10	1514	longer	False_Long	616.7	True_Short	151.4	False	_Long	Oddball
10	3858	shorter	True_Short	575	False_Long	385.8	True	_Short	Oddball
10	3222	shorter	True_Long	350	True_Short	322.2	True	_Long	Oddball
10	20112	shorter	True_Short	641.7	True_Long	2011.2	True	_Short	Oddball
10	596	longer	True_Long	525	True_Short	59.6	True	_Long	Oddball
10	5397	longer	True_Long	483.3	True_Long	539.7	True	_Long	Oddball
10	215	longer	False_Long	566.7	True_Long	21.5	False	_Long	Oddball
10	6856	longer	True_Short	366.6	False_Long	685.6	True	_Short	Oddball
10	5194	shorter	True_Long	416.6	True_Short	519.4	True	_Long	Oddball
10	4224	longer	False_Short	491.6	True_Long	422.4	False	_Short	Oddball
10	6044	longer	False_Short	416.6	False_Short	604.4	False	_Short	Oddball
10	3253	shorter	True_Long	325	False_Short	325.3	True	_Long	Oddball
10	1579	longer	False_Short	641.7	True_Long	157.9	False	_Short	Oddball
10	4155	shorter	True_Long	350	False_Short	415.5	True	_Long	Oddball
10	6459	longer	False_Long	366.6	True_Long	645.9	False	_Long	Oddball
10	4387	shorter	True_Long	483.3	False_Long	438.7	True	_Long	Oddball
10	284	longer	True_Short	608.3	True_Long	28.4	True	_Short	Oddball
10	18271	longer	True_Long	583.3	True_Short	1827.1	True	_Long	Oddball
10	6256	longer	True_Short	591.7	True_Long	625.6	True	_Short	Oddball
10	3100	shorter	False_Short	450	True_Short	310	False	_Short	Oddball
10	5890	shorter	True_Short	500	False_Short	589	True	_Short	Oddball
10	2820	shorter	True_Short	475	True_Short	282	True	_Short	Oddball
10	1524	longer	False_Short	341.6	True_Short	152.4	False	_Short	Oddball
10	4086	longer	False_Long	391.6	False_Short	408.6	False	_Long	Oddball
10	2004	shorter	True_Long	341.6	False_Long	200.4	True	_Long	Oddball
10	5266	longer	False_Long	591.7	True_Long	526.6	False	_Long	Oddball
10	2344	longer	False_Long	525	False_Long	234.4	False	_Long	Oddball
10	8988	shorter	True_Short	341.6	False_Long	898.8	True	_Short	Oddball
10	4885	longer	True_Long	500	True_Short	488.5	True	_Long	Oddball
10	9956	shorter	True_Long	583.3	True_Long	995.6	True	_Long	Oddball
10	7514	longer	True_Short	400	True_Long	751.4	True	_Short	Oddball
10	501	longer	False_Short	566.7	True_Short	50.1	False	_Short	Oddball
10	587	longer	True_Long	483.3	False_Short	58.7	True	_Long	Oddball
10	4267	shorter	True_Short	325	True_Long	426.7	True	_Short	Oddball
10	11488	shorter	True_Long	466.6	True_Short	1148.8	True	_Long	Oddball
10	8061	longer	True_Short	400	True_Long	806.1	True	_Short	Oddball
10	5289	shorter	False_Long	475	True_Short	528.9	False	_Long	Oddball
10	8819	longer	False_Short	633.3	False_Long	881.9	False	_Short	Oddball
10	6600	shorter	True_Long	408.3	False_Short	660	True	_Long	Oddball
10	10224	longer	True_Long	625	True_Long	1022.4	True	_Long	Oddball
10	3770	shorter	True_Short	500	True_Long	377	True	_Short	Oddball
10	772	longer	True_Long	666.7	True_Short	77.2	True	_Long	Oddball
10	5699	longer	True_Short	591.7	True_Long	569.9	True	_Short	Oddball
10	4897	longer	True_Long	583.3	True_Short	489.7	True	_Long	Oddball
10	5313	longer	False_Short	658.3	True_Long	531.3	False	_Short	Oddball
10	6846	longer	True_Short	625	False_Short	684.6	True	_Short	Oddball
10	3981	shorter	True_Long	625	True_Short	398.1	True	_Long	Oddball
10	2795	longer	True_Long	516.7	True_Long	279.5	True	_Long	Oddball
10	6629	longer	True_Short	325	True_Long	662.9	True	_Short	Oddball
10	5040	shorter	True_Long	333.3	True_Long	504	True	_Long	Oddball
10	3810	longer	True_Short	558.3	True_Long	381	True	_Short	Oddball
10	380	longer	False_Short	583.3	True_Short	38	False	_Short	Oddball
10	1279	shorter	True_Long	466.6	False_Short	127.9	True	_Long	Oddball
10	7251	shorter	True_Long	491.6	True_Long	725.1	True	_Long	Oddball
10	20955	shorter	False_Long	358.3	True_Long	2095.5	False	_Long	Oddball
10	20094	longer	True_Long	600	False_Long	2009.4	True	_Long	Oddball
10	7743	shorter	False_Long	608.3	True_Long	774.3	False	_Long	Oddball
10	18927	longer	True_Long	608.3	False_Long	1892.7	True	_Long	Oddball
10	4346	longer	True_Short	541.7	True_Long	434.6	True	_Short	Oddball
10	4679	shorter	True_Short	516.6	True_Short	467.9	True	_Short	Oddball
10	677	longer	True_Long	483.3	True_Short	67.7	True	_Long	Oddball
10	4258	longer	False_Long	416.6	True_Long	425.8	False	_Long	Oddball
10	10721	shorter	True_Short	600	False_Long	1072.1	True	_Short	Oddball
10	4791	longer	False_Short	341.6	True_Short	479.1	False	_Short	Oddball
10	7667	shorter	False_Short	516.6	False_Short	766.7	False	_Short	Oddball
10	8488	longer	True_Short	366.6	False_Short	848.8	True	_Short	Oddball
10	6178	longer	False_Short	508.3	True_Short	617.8	False	_Short	Oddball
10	6152	shorter	True_Long	391.6	False_Short	615.2	True	_Long	Oddball
10	5912	longer	True_Short	575	True_Long	591.2	True	_Short	Oddball
10	1360	shorter	True_Long	333.3	True_Short	136	True	_Long	Oddball
10	3992	longer	True_Long	433.3	True_Long	399.2	True	_Long	Oddball
10	3900	shorter	True_Long	575	True_Long	390	True	_Long	Oddball
10	11293	shorter	True_Short	516.6	True_Long	1129.3	True	_Short	Oddball
10	3983	longer	False_Short	533.3	True_Short	398.3	False	_Short	Oddball
10	9520	shorter	True_Short	350	False_Short	952	True	_Short	Oddball
10	4793	longer	True_Short	650	True_Short	479.3	True	_Short	Oddball
10	10341	longer	False_Long	400	True_Short	1034.1	False	_Long	Oddball
10	5913	shorter	True_Short	616.7	False_Long	591.3	True	_Short	Oddball
10	5738	longer	True_Long	391.6	True_Short	573.8	True	_Long	Oddball
10	6038	shorter	True_Short	458.3	True_Long	603.8	True	_Short	Oddball
10	9931	longer	True_Short	450	True_Short	993.1	True	_Short	Oddball
10	10158	longer	True_Long	408.3	False_Short	1015.8	True	_Long	Oddball
10	1322	shorter	True_Long	416.6	True_Long	132.2	True	_Long	Oddball
10	11907	shorter	True_Long	350	True_Long	1190.7	True	_Long	Oddball
10	6697	shorter	True_Short	416.6	True_Long	669.7	True	_Short	Oddball
10	3794	longer	True_Long	533.3	True_Short	379.4	True	_Long	Oddball
10	2006	shorter	False_Long	641.7	True_Long	200.6	False	_Long	Oddball
10	6224	longer	True_Long	600	False_Long	622.4	True	_Long	Oddball
10	5467	shorter	False_Short	658.3	True_Long	546.7	False	_Short	Oddball
10	4104	longer	True_Short	450	False_Short	410.4	True	_Short	Oddball
10	2492	longer	False_Long	566.7	True_Short	249.2	False	_Long	Oddball
10	2750	longer	True_Long	650	False_Long	275	True	_Long	Oddball
10	4735	longer	True_Long	508.3	True_Long	473.5	True	_Long	Oddball
10	6923	shorter	False_Long	608.3	True_Long	692.3	False	_Long	Oddball
10	6021	longer	True_Long	508.3	False_Long	602.1	True	_Long	Oddball
10	9297	longer	False_Short	391.6	True_Long	929.7	False	_Short	Oddball
10	13444	longer	False_Long	650	False_Short	1344.4	False	_Long	Oddball
10	9981	longer	True_Long	658.3	False_Long	998.1	True	_Long	Oddball
10	6224	longer	True_Short	383.3	True_Long	622.4	True	_Short	Oddball
10	48	longer	False_Long	566.7	True_Short	4.8	False	_Long	Oddball
10	5070	shorter	True_Short	433.3	False_Long	507	True	_Short	Oddball
10	4693	longer	True_Short	416.6	True_Short	469.3	True	_Short	Oddball
10	17003	shorter	False_Short	541.7	True_Short	1700.3	False	_Short	Oddball
10	9938	shorter	True_Short	541.7	False_Short	993.8	True	_Short	Oddball
10	3448	longer	True_Short	616.7	True_Short	344.8	True	_Short	Oddball
10	2489	shorter	True_Long	400	True_Short	248.9	True	_Long	Oddball
10	1524	shorter	True_Long	508.3	True_Long	152.4	True	_Long	Oddball
10	338	longer	True_Short	400	True_Long	33.8	True	_Short	Oddball
10	4946	shorter	True_Short	433.3	True_Short	494.6	True	_Short	Oddball
10	2269	longer	True_Short	583.3	True_Short	226.9	True	_Short	Oddball
10	9272	longer	True_Short	650	True_Short	927.2	True	_Short	Oddball
10	5605	longer	True_Short	625	True_Short	560.5	True	_Short	Oddball
10	567	shorter	True_Long	383.3	True_Short	56.7	True	_Long	Oddball
10	4001	longer	False_Short	550	True_Long	400.1	False	_Short	Oddball
10	5003	longer	True_Long	575	True_Short	500.3	True	_Long	Oddball
10	7378	shorter	True_Long	508.3	True_Long	737.8	True	_Long	Oddball
10	5161	shorter	False_Short	391.6	True_Long	516.1	False	_Short	Oddball
10	1568	longer	True_Short	650	False_Short	156.8	True	_Short	Oddball
10	7378	shorter	True_Short	500	True_Short	737.8	True	_Short	Oddball
10	6048	shorter	False_Short	375	True_Short	604.8	False	_Short	Oddball
10	2253	longer	False_Long	633.3	False_Short	225.3	False	_Long	Oddball
10	1988	shorter	True_Long	383.3	False_Long	198.8	True	_Long	Oddball
10	2245	shorter	True_Short	341.6	True_Long	224.5	True	_Short	Oddball
10	3085	shorter	True_Short	458.3	True_Short	308.5	True	_Short	Oddball
10	1798	longer	True_Long	458.3	True_Short	179.8	True	_Long	Oddball
10	3879	shorter	True_Long	366.6	True_Long	387.9	True	_Long	Oddball
10	3034	longer	False_Long	675	True_Long	303.4	False	_Long	Oddball
10	4083	longer	True_Short	658.3	False_Long	408.3	True	_Short	Oddball
10	718	shorter	True_Short	591.7	True_Short	71.8	True	_Short	Oddball
10	1123	longer	False_Long	466.6	True_Short	112.3	False	_Long	Oddball
10	2051	shorter	True_Long	516.6	False_Long	205.1	True	_Long	Oddball
10	4412	longer	True_Long	641.7	True_Long	441.2	True	_Long	Oddball
10	6253	shorter	False_Short	541.7	True_Long	625.3	False	_Short	Oddball
10	793	longer	True_Short	608.3	False_Short	79.3	True	_Short	Oddball
10	3350	shorter	True_Short	516.6	True_Short	335	True	_Short	Oddball
10	5475	shorter	True_Long	500	True_Short	547.5	True	_Long	Oddball
10	4169	longer	False_Long	666.7	True_Long	416.9	False	_Long	Oddball
10	8808	shorter	True_Long	508.3	False_Long	880.8	True	_Long	Oddball
10	4834	longer	True_Short	641.7	True_Long	483.4	True	_Short	Oddball
10	6049	shorter	True_Long	625	True_Short	604.9	True	_Long	Oddball
10	3813	shorter	True_Long	333.3	True_Long	381.3	True	_Long	Oddball
10	4818	longer	False_Long	458.3	True_Long	481.8	False	_Long	Oddball
10	2162	shorter	True_Short	341.6	False_Long	216.2	True	_Short	Oddball
10	1139	longer	False_Short	525	True_Short	113.9	False	_Short	Oddball
10	347	shorter	True_Short	458.3	False_Short	34.7	True	_Short	Oddball
10	1857	shorter	False_Short	575	True_Short	185.7	False	_Short	Oddball
10	1655	shorter	True_Short	633.3	True_Long	165.5	True	_Short	Oddball
10	5668	longer	True_Short	583.3	True_Short	566.8	True	_Short	Oddball
10	225	shorter	False_Short	425	True_Short	22.5	False	_Short	Oddball
10	1016	longer	True_Short	591.7	False_Short	101.6	True	_Short	Oddball
10	10334	longer	True_Long	550	True_Short	1033.4	True	_Long	Oddball
10	6347	longer	True_Short	516.7	True_Long	634.7	True	_Short	Oddball
10	6887	longer	True_Short	400	True_Short	688.7	True	_Short	Oddball
10	6615	shorter	True_Long	541.7	True_Short	661.5	True	_Long	Oddball
10	1923	longer	False_Long	416.6	True_Long	192.3	False	_Long	Oddball
10	8271	shorter	True_Long	483.3	False_Long	827.1	True	_Long	Oddball
10	5467	longer	False_Short	566.7	True_Long	546.7	False	_Short	Oddball
10	4035	shorter	True_Long	583.3	False_Short	403.5	True	_Long	Oddball
10	745	longer	True_Short	608.3	True_Long	74.5	True	_Short	Oddball
10	6994	longer	True_Long	650	True_Short	699.4	True	_Long	Oddball
10	4493	longer	True_Short	533.3	True_Long	449.3	True	_Short	Oddball
10	2654	shorter	True_Short	333.3	True_Short	265.4	True	_Short	Oddball
10	10458	longer	True_Long	566.7	True_Short	1045.8	True	_Long	Oddball
10	14352	longer	True_Long	566.7	True_Long	1435.2	True	_Long	Oddball
10	7091	shorter	False_Short	500	True_Long	709.1	False	_Short	Oddball
10	5226	shorter	False_Long	500	False_Short	522.6	False	_Long	Oddball
10	3830	shorter	False_Long	516.6	False_Long	383	False	_Long	Oddball
10	2421	longer	True_Short	525	False_Long	242.1	True	_Short	Oddball
10	5605	longer	True_Long	541.7	True_Short	560.5	True	_Long	Oddball
10	1369	shorter	False_Short	416.6	True_Long	136.9	False	_Short	Oddball
10	18	longer	False_Long	591.7	False_Short	1.8	False	_Long	Oddball
10	488	shorter	False_Short	408.3	False_Long	48.8	False	_Short	Oddball
10	546	shorter	True_Short	591.7	False_Short	54.6	True	_Short	Oddball
10	5127	longer	True_Long	641.7	True_Short	512.7	True	_Long	Oddball
10	4565	shorter	False_Long	441.6	True_Long	456.5	False	_Long	Oddball
10	484	longer	True_Long	500	False_Long	48.4	True	_Long	Oddball
10	5649	shorter	True_Long	391.6	True_Long	564.9	True	_Long	Oddball
10	5185	longer	True_Short	583.3	True_Long	518.5	True	_Short	Oddball
10	4025	shorter	True_Short	566.7	True_Short	402.5	True	_Short	Oddball
11	29039	longer	True_Short	366.6	True_Long	2903.9	True	_Short	Oddball
11	29654	longer	False_Long	500	True_Short	2965.4	False	_Long	Oddball
11	41337	shorter	True_Short	400	False_Long	4133.7	True	_Short	Oddball
11	14697	shorter	True_Short	441.6	True_Short	1469.7	True	_Short	Oddball
11	16413	longer	True_Long	583.3	True_Short	1641.3	True	_Long	Oddball
11	22536	longer	False_Long	591.7	True_Long	2253.6	False	_Long	Oddball
11	2385	longer	True_Long	666.7	False_Long	238.5	True	_Long	Oddball
11	31118	longer	True_Short	516.6	True_Long	3111.8	True	_Short	Oddball
11	13259	longer	True_Short	516.6	True_Short	1325.9	True	_Short	Oddball
11	13739	shorter	True_Long	416.6	True_Short	1373.9	True	_Long	Oddball
11	5673	longer	True_Long	533.3	True_Long	567.3	True	_Long	Oddball
11	19154	shorter	False_Long	475	True_Long	1915.4	False	_Long	Oddball
11	6510	shorter	True_Long	433.3	False_Long	651	True	_Long	Oddball
11	7852	shorter	True_Long	341.6	True_Long	785.2	True	_Long	Oddball
11	11384	longer	True_Short	566.7	True_Long	1138.4	True	_Short	Oddball
11	4081	longer	False_Short	508.3	True_Short	408.1	False	_Short	Oddball
11	1738	longer	True_Short	433.3	False_Short	173.8	True	_Short	Oddball
11	24435	shorter	False_Long	625	True_Short	2443.5	False	_Long	Oddball
11	2562	longer	True_Long	383.3	False_Long	256.2	True	_Long	Oddball
11	3590	longer	True_Long	525	True_Long	359	True	_Long	Oddball
11	3940	longer	True_Short	550	True_Long	394	True	_Short	Oddball
11	8873	longer	True_Short	658.3	True_Short	887.3	True	_Short	Oddball
11	10173	shorter	True_Short	450	True_Short	1017.3	True	_Short	Oddball
11	2807	longer	True_Long	541.7	True_Short	280.7	True	_Long	Oddball
11	7024	shorter	True_Short	366.6	True_Long	702.4	True	_Short	Oddball
11	2871	longer	False_Short	466.6	True_Short	287.1	False	_Short	Oddball
11	426	longer	True_Long	575	False_Short	42.6	True	_Long	Oddball
11	3964	longer	False_Long	458.3	True_Long	396.4	False	_Long	Oddball
11	4038	longer	False_Short	608.3	False_Long	403.8	False	_Short	Oddball
11	6468	shorter	True_Short	508.3	False_Short	646.8	True	_Short	Oddball
11	8858	longer	False_Short	566.7	True_Short	885.8	False	_Short	Oddball
11	9763	shorter	False_Short	466.6	True_Long	976.3	False	_Short	Oddball
11	2787	longer	True_Long	408.3	False_Short	278.7	True	_Long	Oddball
11	4378	longer	True_Short	533.3	True_Long	437.8	True	_Short	Oddball
11	5719	shorter	True_Long	358.3	True_Short	571.9	True	_Long	Oddball
11	22575	shorter	False_Short	475	True_Long	2257.5	False	_Short	Oddball
11	1567	longer	True_Short	641.7	False_Short	156.7	True	_Short	Oddball
11	2004	longer	True_Short	541.7	True_Short	200.4	True	_Short	Oddball
11	2063	longer	False_Long	600	True_Short	206.3	False	_Long	Oddball
11	5813	shorter	True_Short	608.3	False_Long	581.3	True	_Short	Oddball
11	3083	shorter	False_Short	433.3	True_Short	308.3	False	_Short	Oddball
11	3448	shorter	False_Long	325	False_Short	344.8	False	_Long	Oddball
11	17406	longer	True_Long	508.3	False_Long	1740.6	True	_Long	Oddball
11	2208	shorter	True_Short	633.3	True_Long	220.8	True	_Short	Oddball
11	9979	longer	True_Long	500	True_Short	997.9	True	_Long	Oddball
11	3153	shorter	True_Short	458.3	True_Long	315.3	True	_Short	Oddball
11	1504	shorter	False_Long	350	True_Short	150.4	False	_Long	Oddball
11	778	shorter	False_Short	650	False_Long	77.8	False	_Short	Oddball
11	1679	longer	True_Short	658.3	False_Short	167.9	True	_Short	Oddball
11	1456	shorter	False_Short	575	True_Short	145.6	False	_Short	Oddball
11	1607	shorter	True_Long	625	False_Short	160.7	True	_Long	Oddball
11	2641	longer	True_Short	641.7	True_Long	264.1	True	_Short	Oddball
11	1885	longer	True_Short	616.7	True_Short	188.5	True	_Short	Oddball
11	14508	longer	True_Short	641.7	True_Short	1450.8	True	_Short	Oddball
11	7097	shorter	True_Short	458.3	True_Short	709.7	True	_Short	Oddball
11	2895	shorter	False_Long	341.6	True_Short	289.5	False	_Long	Oddball
11	1857	shorter	True_Long	458.3	False_Long	185.7	True	_Long	Oddball
11	5191	shorter	True_Short	466.6	True_Long	519.1	True	_Short	Oddball
11	2509	shorter	True_Long	533.3	True_Short	250.9	True	_Long	Oddball
11	2800	longer	True_Long	566.7	True_Long	280	True	_Long	Oddball
11	14751	longer	True_Long	591.7	True_Long	1475.1	True	_Long	Oddball
11	3905	shorter	True_Long	383.3	True_Long	390.5	True	_Long	Oddball
11	1643	longer	True_Long	608.3	True_Long	164.3	True	_Long	Oddball
11	2805	longer	False_Long	483.3	True_Long	280.5	False	_Long	Oddball
11	4532	longer	False_Short	666.7	False_Long	453.2	False	_Short	Oddball
11	4820	longer	True_Long	575	False_Short	482	True	_Long	Oddball
11	2507	longer	False_Short	483.3	True_Long	250.7	False	_Short	Oddball
11	851	longer	False_Short	475	False_Short	85.1	False	_Short	Oddball
11	2501	longer	True_Short	575	False_Short	250.1	True	_Short	Oddball
11	3245	longer	True_Short	675	True_Short	324.5	True	_Short	Oddball
11	1903	longer	True_Long	575	True_Short	190.3	True	_Long	Oddball
11	2548	longer	True_Long	541.7	True_Long	254.8	True	_Long	Oddball
11	2256	longer	True_Long	625	True_Long	225.6	True	_Long	Oddball
11	4810	shorter	False_Short	375	True_Long	481	False	_Short	Oddball
11	5324	longer	True_Short	425	False_Short	532.4	True	_Short	Oddball
11	2348	longer	True_Long	650	True_Short	234.8	True	_Long	Oddball
11	4652	shorter	True_Short	391.6	True_Long	465.2	True	_Short	Oddball
11	1740	longer	True_Long	558.3	True_Short	174	True	_Long	Oddball
11	4014	shorter	True_Short	325	True_Long	401.4	True	_Short	Oddball
11	2324	shorter	True_Short	408.3	True_Short	232.4	True	_Short	Oddball
11	8683	shorter	True_Long	416.6	True_Short	868.3	True	_Long	Oddball
11	3820	shorter	False_Long	433.3	True_Long	382	False	_Long	Oddball
11	2369	shorter	False_Long	391.6	False_Long	236.9	False	_Long	Oddball
11	2446	longer	True_Short	558.3	False_Long	244.6	True	_Short	Oddball
11	3143	shorter	True_Short	400	True_Short	314.3	True	_Short	Oddball
11	3810	longer	True_Short	608.3	True_Short	381	True	_Short	Oddball
11	1311	longer	True_Long	616.7	True_Short	131.1	True	_Long	Oddball
11	7172	shorter	True_Short	408.3	True_Long	717.2	True	_Short	Oddball
11	13916	shorter	True_Long	366.6	True_Short	1391.6	True	_Long	Oddball
11	2970	longer	True_Long	516.6	True_Long	297	True	_Long	Oddball
11	14350	longer	True_Short	441.6	True_Long	1435	True	_Short	Oddball
11	10724	shorter	True_Long	375	True_Short	1072.4	True	_Long	Oddball
11	5568	longer	True_Short	500	True_Long	556.8	True	_Short	Oddball
11	4272	shorter	False_Short	466.6	True_Short	427.2	False	_Short	Oddball
11	2330	longer	False_Long	575	False_Short	233	False	_Long	Oddball
11	2451	longer	True_Long	608.3	False_Long	245.1	True	_Long	Oddball
11	2417	longer	True_Long	450	True_Long	241.7	True	_Long	Oddball
11	2302	longer	True_Long	591.7	True_Long	230.2	True	_Long	Oddball
11	3477	longer	True_Long	383.3	True_Long	347.7	True	_Long	Oddball
11	13047	shorter	True_Short	516.6	True_Long	1304.7	True	_Short	Oddball
11	4690	shorter	True_Short	375	True_Short	469	True	_Short	Oddball
11	2257	shorter	True_Short	400	True_Short	225.7	True	_Short	Oddball
11	2371	shorter	True_Short	475	True_Short	237.1	True	_Short	Oddball
11	2511	longer	False_Short	400	True_Short	251.1	False	_Short	Oddball
11	1315	shorter	True_Short	525	False_Short	131.5	True	_Short	Oddball
11	1263	shorter	False_Long	550	True_Short	126.3	False	_Long	Oddball
11	1984	shorter	False_Short	458.3	False_Long	198.4	False	_Short	Oddball
11	2749	longer	False_Long	641.7	False_Short	274.9	False	_Long	Oddball
11	2304	shorter	False_Long	583.3	False_Long	230.4	False	_Long	Oddball
11	6045	shorter	True_Long	566.7	False_Long	604.5	True	_Long	Oddball
11	1443	shorter	True_Long	450	True_Long	144.3	True	_Long	Oddball
11	1581	longer	False_Long	658.3	True_Long	158.1	False	_Long	Oddball
11	3363	shorter	True_Long	533.3	False_Long	336.3	True	_Long	Oddball
11	1865	longer	True_Long	558.3	True_Long	186.5	True	_Long	Oddball
11	1327	longer	True_Long	508.3	True_Long	132.7	True	_Long	Oddball
11	1537	longer	True_Short	525	True_Long	153.7	True	_Short	Oddball
11	1878	longer	True_Short	583.3	True_Short	187.8	True	_Short	Oddball
11	1711	longer	True_Short	616.7	True_Short	171.1	True	_Short	Oddball
11	11506	shorter	False_Long	491.6	True_Short	1150.6	False	_Long	Oddball
11	3936	shorter	False_Short	358.3	False_Long	393.6	False	_Short	Oddball
11	3293	shorter	True_Short	400	False_Short	329.3	True	_Short	Oddball
11	1176	shorter	False_Short	550	True_Short	117.6	False	_Short	Oddball
11	2538	shorter	True_Long	625	False_Short	253.8	True	_Long	Oddball
11	3356	shorter	True_Long	650	True_Long	335.6	True	_Long	Oddball
11	2311	shorter	True_Long	425	True_Long	231.1	True	_Long	Oddball
11	1468	shorter	False_Short	666.7	True_Long	146.8	False	_Short	Oddball
11	6349	shorter	True_Short	441.6	False_Short	634.9	True	_Short	Oddball
11	1992	longer	True_Short	641.7	True_Short	199.2	True	_Short	Oddball
11	2199	longer	True_Short	666.7	True_Short	219.9	True	_Short	Oddball
11	2293	shorter	False_Short	408.3	True_Long	229.3	False	_Short	Oddball
11	553	longer	False_Short	508.3	False_Short	55.3	False	_Short	Oddball
11	1499	longer	False_Long	533.3	False_Short	149.9	False	_Long	Oddball
11	934	longer	True_Long	608.3	False_Long	93.4	True	_Long	Oddball
11	2211	longer	True_Short	500	True_Long	221.1	True	_Short	Oddball
11	5551	shorter	True_Short	616.7	True_Short	555.1	True	_Short	Oddball
11	4958	longer	False_Short	516.6	True_Short	495.8	False	_Short	Oddball
11	3999	longer	True_Long	650	False_Short	399.9	True	_Long	Oddball
11	3329	longer	True_Short	658.3	True_Long	332.9	True	_Short	Oddball
11	3216	longer	True_Short	533.3	True_Short	321.6	True	_Short	Oddball
11	2371	shorter	True_Long	341.6	True_Short	237.1	True	_Long	Oddball
11	1785	shorter	True_Short	416.6	True_Long	178.5	True	_Short	Oddball
11	3372	longer	True_Short	641.7	True_Short	337.2	True	_Short	Oddball
11	2844	shorter	True_Long	333.3	True_Short	284.4	True	_Long	Oddball
11	2302	longer	False_Long	616.7	True_Long	230.2	False	_Long	Oddball
11	5870	longer	True_Long	400	False_Long	587	True	_Long	Oddball
11	2034	shorter	True_Short	391.6	True_Long	203.4	True	_Short	Oddball
11	11464	longer	True_Short	608.3	True_Short	1146.4	True	_Short	Oddball
11	2680	shorter	False_Short	600	True_Short	268	False	_Short	Oddball
11	3901	longer	True_Long	625	False_Short	390.1	True	_Long	Oddball
11	2276	shorter	True_Long	416.6	True_Long	227.6	True	_Long	Oddball
11	2225	shorter	True_Long	450	True_Long	222.5	True	_Long	Oddball
11	3796	shorter	True_Long	600	True_Long	379.6	True	_Long	Oddball
11	958	longer	True_Long	666.7	True_Long	95.8	True	_Long	Oddball
11	3852	shorter	True_Short	458.3	True_Long	385.2	True	_Short	Oddball
11	2177	shorter	True_Long	350	True_Short	217.7	True	_Long	Oddball
11	12825	longer	False_Long	508.3	True_Long	1282.5	False	_Long	Oddball
11	3124	longer	True_Short	550	False_Long	312.4	True	_Short	Oddball
11	3685	shorter	False_Long	633.3	True_Short	368.5	False	_Long	Oddball
11	2389	shorter	True_Short	658.3	False_Long	238.9	True	_Short	Oddball
11	1433	shorter	True_Short	341.6	True_Short	143.3	True	_Short	Oddball
11	915	shorter	False_Long	500	True_Short	91.5	False	_Long	Oddball
11	2149	shorter	False_Short	608.3	False_Long	214.9	False	_Short	Oddball
11	6471	shorter	True_Short	575	True_Short	647.1	True	_Short	Oddball
11	1159	longer	True_Long	583.3	True_Short	115.9	True	_Long	Oddball
11	1874	longer	True_Long	441.6	True_Long	187.4	True	_Long	Oddball
11	1098	longer	True_Short	541.7	True_Long	109.8	True	_Short	Oddball
11	2266	longer	True_Long	516.6	True_Short	226.6	True	_Long	Oddball
11	2127	longer	True_Short	508.3	True_Long	212.7	True	_Short	Oddball
11	1834	longer	True_Short	508.3	True_Short	183.4	True	_Short	Oddball
11	1149	longer	True_Long	475	True_Short	114.9	True	_Long	Oddball
11	2438	longer	True_Long	416.6	True_Long	243.8	True	_Long	Oddball
11	2018	longer	True_Short	591.7	True_Long	201.8	True	_Short	Oddball
11	1190	longer	False_Long	416.6	True_Short	119	False	_Long	Oddball
11	2151	longer	True_Long	625	False_Long	215.1	True	_Long	Oddball
11	2242	longer	True_Short	550	True_Long	224.2	True	_Short	Oddball
11	4076	shorter	False_Short	375	True_Short	407.6	False	_Short	Oddball
11	4233	longer	False_Short	383.3	False_Short	423.3	False	_Short	Oddball
11	3401	shorter	True_Long	408.3	False_Short	340.1	True	_Long	Oddball
11	4491	shorter	True_Short	525	True_Long	449.1	True	_Short	Oddball
11	10519	shorter	True_Long	425	True_Short	1051.9	True	_Long	Oddball
11	25322	shorter	True_Long	483.3	True_Long	2532.2	True	_Long	Oddball
11	2394	shorter	True_Short	366.6	True_Long	239.4	True	_Short	Oddball
11	14369	longer	False_Long	375	True_Short	1436.9	False	_Long	Oddball
11	2892	shorter	True_Short	641.7	False_Long	289.2	True	_Short	Oddball
11	1933	longer	True_Long	658.3	True_Short	193.3	True	_Long	Oddball
11	2143	longer	True_Short	666.7	True_Long	214.3	True	_Short	Oddball
11	2571	longer	True_Long	666.7	True_Short	257.1	True	_Long	Oddball
11	7366	shorter	False_Long	500	True_Long	736.6	False	_Long	Oddball
11	2503	shorter	False_Short	408.3	False_Long	250.3	False	_Short	Oddball
11	2918	shorter	False_Long	458.3	False_Short	291.8	False	_Long	Oddball
11	602	shorter	False_Short	483.3	False_Long	60.2	False	_Short	Oddball
11	916	shorter	False_Short	341.6	False_Short	91.6	False	_Short	Oddball
11	2550	longer	True_Short	608.3	False_Short	255	True	_Short	Oddball
11	2805	shorter	True_Long	458.3	True_Short	280.5	True	_Long	Oddball
11	4993	shorter	False_Long	600	True_Long	499.3	False	_Long	Oddball
11	4162	shorter	True_Long	491.6	True_Short	416.2	True	_Long	Oddball
11	5418	shorter	True_Short	625	True_Long	541.8	True	_Short	Oddball
11	1709	longer	True_Short	516.7	True_Short	170.9	True	_Short	Oddball
11	13335	shorter	True_Short	550	True_Short	1333.5	True	_Short	Oddball
11	2103	longer	False_Long	491.6	True_Short	210.3	False	_Long	Oddball
11	2825	shorter	True_Long	333.3	False_Long	282.5	True	_Long	Oddball
11	2805	shorter	True_Short	350	True_Long	280.5	True	_Short	Oddball
11	1783	longer	True_Long	625	True_Short	178.3	True	_Long	Oddball
11	4437	shorter	False_Short	575	True_Long	443.7	False	_Short	Oddball
11	2580	longer	True_Short	583.3	False_Short	258	True	_Short	Oddball
11	1641	longer	False_Short	675	True_Short	164.1	False	_Short	Oddball
11	3566	shorter	False_Long	375	False_Short	356.6	False	_Long	Oddball
11	2128	shorter	True_Long	391.6	False_Long	212.8	True	_Long	Oddball
11	2191	shorter	True_Short	416.6	True_Long	219.1	True	_Short	Oddball
11	2427	shorter	True_Long	341.6	True_Short	242.7	True	_Long	Oddball
11	2075	shorter	True_Long	383.3	True_Long	207.5	True	_Long	Oddball
11	1006	shorter	True_Short	450	True_Long	100.6	True	_Short	Oddball
11	7444	shorter	True_Long	550	True_Short	744.4	True	_Long	Oddball
11	2868	longer	False_Long	641.7	True_Long	286.8	False	_Long	Oddball
11	2444	shorter	True_Long	325	False_Long	244.4	True	_Long	Oddball
11	2871	shorter	True_Short	475	True_Long	287.1	True	_Short	Oddball
11	3888	longer	False_Short	558.3	True_Short	388.8	False	_Short	Oddball
11	2375	shorter	True_Short	583.3	False_Short	237.5	True	_Short	Oddball
11	1389	longer	True_Long	575	True_Short	138.9	True	_Long	Oddball
11	3211	shorter	True_Long	458.3	True_Long	321.1	True	_Long	Oddball
11	2113	longer	True_Long	575	True_Long	211.3	True	_Long	Oddball
11	820	longer	False_Short	608.3	True_Long	82	False	_Short	Oddball
11	2160	shorter	False_Short	350	False_Short	216	False	_Short	Oddball
11	2398	shorter	True_Short	375	False_Short	239.8	True	_Short	Oddball
11	12016	longer	False_Long	466.6	True_Short	1201.6	False	_Long	Oddball
11	1683	longer	False_Long	575	False_Long	168.3	False	_Long	Oddball
11	5405	longer	True_Long	475	False_Long	540.5	True	_Long	Oddball
11	3698	shorter	True_Short	508.3	True_Long	369.8	True	_Short	Oddball
11	1192	shorter	True_Short	516.7	False_Long	119.2	True	_Short	Oddball
11	1037	longer	True_Long	616.7	True_Short	103.7	True	_Long	Oddball
11	4022	shorter	True_Long	583.3	True_Long	402.2	True	_Long	Oddball
11	2050	longer	True_Long	475	True_Long	205	True	_Long	Oddball
11	1047	shorter	True_Short	491.6	True_Long	104.7	True	_Short	Oddball
11	2248	shorter	False_Short	483.3	True_Short	224.8	False	_Short	Oddball
11	1742	longer	False_Short	625	False_Short	174.2	False	_Short	Oddball
11	3587	longer	True_Long	558.3	False_Short	358.7	True	_Long	Oddball
11	14080	longer	True_Short	591.7	True_Long	1408	True	_Short	Oddball
11	2551	shorter	True_Long	358.3	True_Short	255.1	True	_Long	Oddball
11	3921	shorter	False_Short	508.3	True_Long	392.1	False	_Short	Oddball
11	15105	longer	False_Long	591.7	False_Short	1510.5	False	_Long	Oddball
11	3604	longer	True_Short	625	False_Long	360.4	True	_Short	Oddball
11	4318	shorter	False_Short	441.6	True_Short	431.8	False	_Short	Oddball
11	663	shorter	True_Long	458.3	False_Short	66.3	True	_Long	Oddball
11	1078	shorter	True_Long	441.6	True_Long	107.8	True	_Long	Oddball
11	1499	shorter	True_Short	425	True_Long	149.9	True	_Short	Oddball
11	2939	longer	True_Short	633.3	True_Short	293.9	True	_Short	Oddball
11	403	shorter	True_Short	633.3	True_Short	40.3	True	_Short	Oddball
11	1861	longer	False_Long	658.3	True_Short	186.1	False	_Long	Oddball
11	2063	longer	False_Long	458.3	False_Long	206.3	False	_Long	Oddball
11	1954	shorter	True_Short	458.3	False_Long	195.4	True	_Short	Oddball
11	8249	shorter	True_Long	416.6	True_Short	824.9	True	_Long	Oddball
11	9159	shorter	True_Long	441.6	True_Long	915.9	True	_Long	Oddball
11	2169	shorter	True_Short	341.6	True_Long	216.9	True	_Short	Oddball
11	7001	longer	False_Long	450	True_Short	700.1	False	_Long	Oddball
11	859	longer	True_Long	600	False_Long	85.9	True	_Long	Oddball
11	647	shorter	True_Long	591.7	True_Long	64.7	True	_Long	Oddball
11	2696	shorter	True_Long	566.7	True_Long	269.6	True	_Long	Oddball
11	3456	shorter	True_Short	616.7	True_Long	345.6	True	_Short	Oddball
11	1446	shorter	False_Short	666.7	True_Short	144.6	False	_Short	Oddball
11	910	shorter	True_Short	583.3	False_Short	91	True	_Short	Oddball
11	1021	shorter	True_Short	416.6	True_Short	102.1	True	_Short	Oddball
11	2923	shorter	True_Long	450	True_Short	292.3	True	_Long	Oddball
11	1818	longer	True_Long	616.7	True_Long	181.8	True	_Long	Oddball
11	2412	shorter	False_Short	325	True_Long	241.2	False	_Short	Oddball
11	3370	longer	True_Long	508.3	False_Short	337	True	_Long	Oddball
11	5325	shorter	True_Long	325	True_Long	532.5	True	_Long	Oddball
11	2169	shorter	True_Short	341.6	True_Long	216.9	True	_Short	Oddball
11	2789	shorter	True_Short	416.6	True_Short	278.9	True	_Short	Oddball
11	5700	longer	True_Short	433.3	True_Short	570	True	_Short	Oddball
11	1153	shorter	True_Short	383.3	True_Short	115.3	True	_Short	Oddball
11	1419	shorter	False_Long	366.6	True_Short	141.9	False	_Long	Oddball
11	903	longer	True_Short	533.3	False_Long	90.3	True	_Short	Oddball
11	4274	longer	True_Long	625	True_Short	427.4	True	_Long	Oddball
11	2952	longer	False_Long	625	True_Long	295.2	False	_Long	Oddball
11	2366	shorter	True_Short	358.3	False_Long	236.6	True	_Short	Oddball
11	3533	longer	True_Short	633.3	True_Short	353.3	True	_Short	Oddball
11	2722	shorter	True_Long	425	True_Short	272.2	True	_Long	Oddball
11	1677	longer	False_Long	491.6	True_Long	167.7	False	_Long	Oddball
11	3442	shorter	False_Long	366.6	False_Long	344.2	False	_Long	Oddball
11	762	shorter	False_Short	541.6	False_Long	76.2	False	_Short	Oddball
11	1343	longer	False_Short	658.3	False_Short	134.3	False	_Short	Oddball
11	2180	shorter	False_Short	358.3	False_Short	218	False	_Short	Oddball
11	16551	longer	True_Long	400	False_Short	1655.1	True	_Long	Oddball
11	748	shorter	False_Long	400	True_Long	74.8	False	_Long	Oddball
11	1337	shorter	True_Long	600	False_Long	133.7	True	_Long	Oddball
11	4	shorter	True_Short	383.3	True_Long	0.4	True	_Short	Oddball
11	7646	longer	True_Long	641.7	True_Short	764.6	True	_Long	Oddball
11	776	shorter	True_Short	600	True_Long	77.6	True	_Short	Oddball
11	1921	longer	True_Long	608.3	True_Short	192.1	True	_Long	Oddball
11	7785	longer	True_Long	491.6	True_Long	778.5	True	_Long	Oddball
11	3283	longer	True_Long	625	True_Long	328.3	True	_Long	Oddball
11	2093	longer	False_Short	633.3	True_Long	209.3	False	_Short	Oddball
11	5411	longer	True_Short	483.3	False_Short	541.1	True	_Short	Oddball
11	5281	shorter	True_Short	566.7	True_Short	528.1	True	_Short	Oddball
11	11364	longer	False_Long	650	True_Short	1136.4	False	_Long	Oddball
11	4478	longer	False_Long	625	False_Long	447.8	False	_Long	Oddball
11	2709	longer	True_Long	525	False_Long	270.9	True	_Long	Oddball
11	1577	shorter	False_Short	350	True_Long	157.7	False	_Short	Oddball
11	2482	longer	False_Long	525	False_Short	248.2	False	_Long	Oddball
11	2654	shorter	True_Long	475	False_Long	265.4	True	_Long	Oddball
11	3890	shorter	True_Short	625	True_Long	389	True	_Short	Oddball
11	2574	shorter	True_Short	491.6	True_Short	257.4	True	_Short	Oddball
11	3998	shorter	False_Short	566.7	True_Short	399.8	False	_Short	Oddball
11	3012	shorter	True_Long	608.3	False_Short	301.2	True	_Long	Oddball
11	5213	shorter	True_Short	383.3	True_Long	521.3	True	_Short	Oddball
11	3430	shorter	False_Short	325	True_Short	343	False	_Short	Oddball
11	3945	longer	True_Long	516.6	False_Short	394.5	True	_Long	Oddball
11	6882	longer	True_Long	608.3	True_Long	688.2	True	_Long	Oddball
11	2691	shorter	True_Long	341.6	True_Long	269.1	True	_Long	Oddball
11	7392	longer	True_Long	525	True_Long	739.2	True	_Long	Oddball
11	2479	longer	False_Short	533.3	True_Long	247.9	False	_Short	Oddball
11	2287	shorter	False_Long	383.3	False_Short	228.7	False	_Long	Oddball
11	8221	shorter	True_Short	525	False_Long	822.1	True	_Short	Oddball
11	2552	shorter	True_Long	500	True_Short	255.2	True	_Long	Oddball
11	3650	longer	True_Long	550	True_Long	365	True	_Long	Oddball
11	3271	shorter	True_Short	375	True_Long	327.1	True	_Short	Oddball
11	2478	shorter	False_Short	441.6	True_Short	247.8	False	_Short	Oddball
11	15535	longer	True_Long	658.3	False_Short	1553.5	True	_Long	Oddball
11	2799	longer	False_Long	633.3	True_Long	279.9	False	_Long	Oddball
11	1733	shorter	True_Short	575	False_Long	173.3	True	_Short	Oddball
11	2606	shorter	True_Short	433.3	True_Short	260.6	True	_Short	Oddball
11	1592	longer	True_Long	625	True_Short	159.2	True	_Long	Oddball
11	9415	shorter	True_Short	666.7	True_Long	941.5	True	_Short	Oddball
11	2206	shorter	True_Long	425	True_Short	220.6	True	_Long	Oddball
11	4903	longer	True_Short	625	True_Long	490.3	True	_Short	Oddball
11	1970	longer	True_Short	625	True_Short	197	True	_Short	Oddball
11	1460	longer	True_Short	666.7	True_Short	146	True	_Short	Oddball
12	12036	shorter	False_Long	408.3	True_Long	1203.6	False	_Long	Oddball
12	10719	longer	True_Long	633.3	False_Long	1071.9	True	_Long	Oddball
12	11693	longer	False_Long	441.6	True_Long	1169.3	False	_Long	Oddball
12	12080	shorter	False_Long	408.3	False_Long	1208	False	_Long	Oddball
12	12237	longer	True_Long	541.6	False_Long	1223.7	True	_Long	Oddball
12	11910	shorter	True_Short	375	True_Long	1191	True	_Short	Oddball
12	14713	shorter	True_Short	383.3	True_Short	1471.3	True	_Short	Oddball
12	8462	longer	True_Short	341.6	True_Short	846.2	True	_Short	Oddball
12	11825	longer	True_Short	533.3	True_Short	1182.5	True	_Short	Oddball
12	11927	longer	False_Short	541.7	True_Short	1192.7	False	_Short	Oddball
12	9834	longer	True_Long	583.3	False_Short	983.4	True	_Long	Oddball
12	5887	longer	True_Short	666.7	True_Long	588.7	True	_Short	Oddball
12	12032	shorter	False_Long	400	True_Short	1203.2	False	_Long	Oddball
12	13312	shorter	True_Long	341.6	False_Long	1331.2	True	_Long	Oddball
12	8519	longer	True_Long	400	True_Long	851.9	True	_Long	Oddball
12	14822	shorter	False_Short	575	True_Long	1482.2	False	_Short	Oddball
12	4402	longer	True_Long	508.3	False_Short	440.2	True	_Long	Oddball
12	11351	shorter	True_Long	333.3	True_Long	1135.1	True	_Long	Oddball
12	7043	longer	True_Short	616.7	True_Long	704.3	True	_Short	Oddball
12	14239	longer	True_Short	491.6	True_Short	1423.9	True	_Short	Oddball
12	8362	longer	True_Short	650	True_Short	836.2	True	_Short	Oddball
12	6845	shorter	True_Short	341.6	True_Short	684.5	True	_Short	Oddball
12	7609	longer	False_Long	550	True_Short	760.9	False	_Long	Oddball
12	7660	longer	True_Long	658.3	False_Long	766	True	_Long	Oddball
12	7157	shorter	False_Short	475	True_Long	715.7	False	_Short	Oddball
12	4466	longer	True_Short	591.7	False_Short	446.6	True	_Short	Oddball
12	6313	longer	False_Short	325	True_Short	631.3	False	_Short	Oddball
12	7600	longer	True_Short	341.6	False_Short	760	True	_Short	Oddball
12	9241	longer	True_Long	483.3	True_Short	924.1	True	_Long	Oddball
12	8122	shorter	True_Long	416.6	True_Long	812.2	True	_Long	Oddball
12	6895	longer	False_Short	441.6	True_Long	689.5	False	_Short	Oddball
12	8976	shorter	True_Short	450	False_Long	897.6	True	_Short	Oddball
12	13213	longer	False_Short	500	True_Short	1321.3	False	_Short	Oddball
12	9882	shorter	True_Short	391.6	False_Short	988.2	True	_Short	Oddball
12	13019	longer	True_Long	516.6	True_Short	1301.9	True	_Long	Oddball
12	7805	shorter	True_Short	516.6	True_Long	780.5	True	_Short	Oddball
12	12375	longer	False_Short	583.3	True_Short	1237.5	False	_Short	Oddball
12	13131	shorter	True_Long	616.7	False_Short	1313.1	True	_Long	Oddball
12	3904	longer	True_Short	541.6	True_Long	390.4	True	_Short	Oddball
12	8752	shorter	True_Long	433.3	True_Short	875.2	True	_Long	Oddball
12	6686	longer	True_Long	633.3	True_Long	668.6	True	_Long	Oddball
12	11957	longer	True_Short	341.6	True_Long	1195.7	True	_Short	Oddball
12	6817	longer	True_Long	400	True_Short	681.7	True	_Long	Oddball
12	6663	shorter	True_Short	491.6	True_Long	666.3	True	_Short	Oddball
12	12240	shorter	True_Short	375	True_Short	1224	True	_Short	Oddball
12	15024	shorter	False_Long	358.3	True_Short	1502.4	False	_Long	Oddball
12	5900	longer	True_Long	650	False_Long	590	True	_Long	Oddball
12	11391	shorter	False_Long	433.3	True_Long	1139.1	False	_Long	Oddball
12	7274	longer	True_Short	541.7	False_Long	727.4	True	_Short	Oddball
12	11295	longer	True_Long	566.7	True_Short	1129.5	True	_Long	Oddball
12	10734	shorter	False_Short	458.3	True_Long	1073.4	False	_Short	Oddball
12	9102	longer	True_Long	558.3	False_Short	910.2	True	_Long	Oddball
12	13545	shorter	True_Short	366.6	True_Long	1354.5	True	_Short	Oddball
12	5807	longer	False_Short	575	True_Short	580.7	False	_Short	Oddball
12	14610	longer	True_Short	400	False_Short	1461	True	_Short	Oddball
12	8153	longer	True_Short	466.6	True_Short	815.3	True	_Short	Oddball
12	6767	shorter	True_Long	391.6	True_Short	676.7	True	_Long	Oddball
12	9128	longer	True_Long	566.7	True_Long	912.8	True	_Long	Oddball
12	14652	longer	False_Long	625	True_Long	1465.2	False	_Long	Oddball
12	16274	shorter	False_Short	666.7	False_Long	1627.4	False	_Short	Oddball
12	9277	shorter	True_Long	408.3	False_Short	927.7	True	_Long	Oddball
12	11148	shorter	False_Long	341.6	True_Long	1114.8	False	_Long	Oddball
12	10397	longer	True_Short	550	False_Long	1039.7	True	_Short	Oddball
12	9385	shorter	True_Long	441.6	True_Short	938.5	True	_Long	Oddball
12	7776	longer	True_Long	475	True_Short	777.6	True	_Long	Oddball
12	12719	shorter	False_Short	450	True_Long	1271.9	False	_Short	Oddball
12	3961	longer	True_Short	608.3	False_Short	396.1	True	_Short	Oddball
12	11256	longer	True_Long	516.6	True_Short	1125.6	True	_Long	Oddball
12	11355	shorter	True_Short	408.3	True_Long	1135.5	True	_Short	Oddball
12	5512	longer	True_Long	616.7	True_Short	551.2	True	_Long	Oddball
12	8373	longer	True_Long	641.7	True_Long	837.3	True	_Long	Oddball
12	6530	shorter	True_Short	358.3	True_Long	653	True	_Short	Oddball
12	9168	shorter	True_Long	500	True_Short	916.8	True	_Long	Oddball
12	9035	shorter	False_Long	358.3	True_Long	903.5	False	_Long	Oddball
12	6690	longer	True_Long	508.3	False_Long	669	True	_Long	Oddball
12	7624	shorter	False_Long	341.6	True_Long	762.4	False	_Long	Oddball
12	13664	shorter	True_Short	325	False_Long	1366.4	True	_Short	Oddball
12	15036	shorter	True_Short	383.3	True_Short	1503.6	True	_Short	Oddball
12	5719	longer	True_Short	575	True_Short	571.9	True	_Short	Oddball
12	8456	longer	False_Long	533.3	True_Short	845.6	False	_Long	Oddball
12	8403	shorter	False_Short	475	False_Long	840.3	False	_Short	Oddball
12	6472	shorter	True_Short	566.7	False_Short	647.2	True	_Short	Oddball
12	14685	longer	True_Short	608.3	True_Short	1468.5	True	_Short	Oddball
12	7987	longer	False_Short	658.3	True_Short	798.7	False	_Short	Oddball
12	8731	shorter	True_Short	325	False_Short	873.1	True	_Short	Oddball
12	7270	longer	True_Short	566.7	True_Short	727	True	_Short	Oddball
12	5271	longer	False_Long	616.7	True_Short	527.1	False	_Long	Oddball
12	17145	shorter	False_Short	375	False_Long	1714.5	False	_Short	Oddball
12	12288	longer	True_Long	375	False_Short	1228.8	True	_Long	Oddball
12	8349	shorter	True_Long	366.6	True_Long	834.9	True	_Long	Oddball
12	12329	shorter	True_Long	358.3	True_Long	1232.9	True	_Long	Oddball
12	5082	longer	True_Short	666.7	True_Long	508.2	True	_Short	Oddball
12	10907	shorter	True_Long	475	True_Short	1090.7	True	_Long	Oddball
12	6826	longer	False_Short	491.6	True_Long	682.6	False	_Short	Oddball
12	4654	longer	False_Long	491.6	False_Short	465.4	False	_Long	Oddball
12	3078	shorter	True_Long	616.7	False_Long	307.8	True	_Long	Oddball
12	6737	longer	True_Long	491.6	True_Long	673.7	True	_Long	Oddball
12	12237	shorter	False_Short	608.3	True_Long	1223.7	False	_Short	Oddball
12	7184	shorter	False_Long	350	False_Short	718.4	False	_Long	Oddball
12	15293	shorter	True_Short	391.6	False_Long	1529.3	True	_Short	Oddball
12	8229	shorter	True_Short	516.6	True_Short	822.9	True	_Short	Oddball
12	5666	longer	True_Short	575	True_Short	566.6	True	_Short	Oddball
12	7070	longer	True_Long	666.7	True_Short	707	True	_Long	Oddball
12	8025	shorter	False_Long	450	True_Long	802.5	False	_Long	Oddball
12	11468	shorter	False_Short	375	False_Long	1146.8	False	_Short	Oddball
12	14532	shorter	False_Long	341.6	False_Short	1453.2	False	_Long	Oddball
12	6601	shorter	True_Short	358.3	False_Long	660.1	True	_Short	Oddball
12	7512	longer	True_Long	408.3	True_Short	751.2	True	_Long	Oddball
12	3416	longer	True_Long	633.3	True_Long	341.6	True	_Long	Oddball
12	10640	longer	False_Short	583.3	True_Long	1064	False	_Short	Oddball
12	5329	longer	True_Short	600	False_Short	532.9	True	_Short	Oddball
12	8701	shorter	True_Long	383.3	True_Short	870.1	True	_Long	Oddball
12	5778	longer	True_Long	583.3	True_Long	577.8	True	_Long	Oddball
12	7128	longer	True_Short	633.3	True_Long	712.8	True	_Short	Oddball
12	6801	shorter	True_Short	491.6	True_Short	680.1	True	_Short	Oddball
12	8214	longer	True_Short	575	True_Short	821.4	True	_Short	Oddball
12	8685	shorter	False_Long	350	True_Short	868.5	False	_Long	Oddball
12	13682	shorter	True_Long	583.3	False_Long	1368.2	True	_Long	Oddball
12	11911	shorter	True_Short	441.6	True_Long	1191.1	True	_Short	Oddball
12	6802	longer	True_Long	525	True_Short	680.2	True	_Long	Oddball
12	9908	shorter	True_Short	541.7	True_Long	990.8	True	_Short	Oddball
12	8685	longer	False_Short	450	True_Short	868.5	False	_Short	Oddball
12	8106	shorter	True_Long	325	False_Short	810.6	True	_Long	Oddball
12	5382	longer	True_Short	583.3	True_Long	538.2	True	_Short	Oddball
12	10042	longer	False_Short	600	True_Short	1004.2	False	_Short	Oddball
12	6976	longer	True_Long	608.3	False_Short	697.6	True	_Long	Oddball
12	9703	longer	True_Long	633.3	True_Long	970.3	True	_Long	Oddball
12	17947	shorter	True_Long	566.7	True_Long	1794.7	True	_Long	Oddball
12	5851	shorter	False_Long	391.6	True_Long	585.1	False	_Long	Oddball
12	12810	shorter	True_Short	600	False_Long	1281	True	_Short	Oddball
12	8351	shorter	True_Short	391.6	False_Short	835.1	True	_Short	Oddball
12	8591	shorter	True_Short	350	True_Short	859.1	True	_Short	Oddball
12	7935	shorter	True_Long	325	True_Short	793.5	True	_Long	Oddball
12	6302	longer	True_Short	675	True_Long	630.2	True	_Short	Oddball
12	7168	shorter	True_Short	391.6	True_Short	716.8	True	_Short	Oddball
12	6386	longer	False_Long	583.3	True_Short	638.6	False	_Long	Oddball
12	10797	shorter	False_Long	483.3	False_Long	1079.7	False	_Long	Oddball
12	8446	longer	True_Short	583.3	False_Long	844.6	True	_Short	Oddball
12	10616	shorter	False_Short	516.6	True_Short	1061.6	False	_Short	Oddball
12	6486	longer	False_Long	608.3	False_Short	648.6	False	_Long	Oddball
12	9281	shorter	True_Long	508.3	False_Long	928.1	True	_Long	Oddball
12	9937	shorter	True_Short	416.6	True_Long	993.7	True	_Short	Oddball
12	7275	longer	True_Long	408.3	True_Short	727.5	True	_Long	Oddball
12	7088	shorter	True_Short	325	True_Long	708.8	True	_Short	Oddball
12	6004	longer	True_Short	583.3	True_Short	600.4	True	_Short	Oddball
12	4935	longer	True_Long	616.7	True_Short	493.5	True	_Long	Oddball
12	4872	longer	True_Short	650	True_Long	487.2	True	_Short	Oddball
12	5516	longer	False_Long	650	True_Short	551.6	False	_Long	Oddball
12	8824	shorter	True_Long	525	False_Long	882.4	True	_Long	Oddball
12	9904	shorter	False_Short	600	True_Long	990.4	False	_Short	Oddball
12	5141	longer	True_Long	458.3	False_Short	514.1	True	_Long	Oddball
12	7018	longer	True_Short	583.3	True_Long	701.8	True	_Short	Oddball
12	5461	shorter	True_Short	575	True_Short	546.1	True	_Short	Oddball
12	11595	shorter	True_Long	666.7	True_Short	1159.5	True	_Long	Oddball
12	6476	longer	True_Long	583.3	True_Long	647.6	True	_Long	Oddball
12	11904	shorter	True_Long	333.3	True_Long	1190.4	True	_Long	Oddball
12	6974	longer	True_Long	675	True_Long	697.4	True	_Long	Oddball
12	3145	longer	True_Long	625	True_Long	314.5	True	_Long	Oddball
12	13135	shorter	False_Short	500	True_Long	1313.5	False	_Short	Oddball
12	6118	shorter	True_Short	416.6	False_Short	611.8	True	_Short	Oddball
12	4875	longer	False_Long	641.7	True_Short	487.5	False	_Long	Oddball
12	13205	shorter	False_Short	475	False_Long	1320.5	False	_Short	Oddball
12	13246	longer	True_Long	525	False_Short	1324.6	True	_Long	Oddball
12	9720	longer	False_Short	566.7	True_Short	972	False	_Short	Oddball
12	3871	longer	False_Long	600	False_Short	387.1	False	_Long	Oddball
12	9941	longer	True_Short	425	False_Long	994.1	True	_Short	Oddball
12	12937	shorter	False_Short	500	True_Short	1293.7	False	_Short	Oddball
12	5174	longer	True_Long	658.3	False_Short	517.4	True	_Long	Oddball
12	6828	shorter	True_Short	333.3	True_Long	682.8	True	_Short	Oddball
12	11062	longer	True_Long	475	True_Short	1106.2	True	_Long	Oddball
12	4128	longer	True_Short	616.7	True_Long	412.8	True	_Short	Oddball
12	17473	longer	False_Long	575	True_Short	1747.3	False	_Long	Oddball
12	9262	shorter	True_Short	366.6	False_Long	926.2	True	_Short	Oddball
12	8068	longer	True_Short	641.7	True_Short	806.8	True	_Short	Oddball
12	6999	shorter	False_Long	416.6	True_Short	699.9	False	_Long	Oddball
12	5623	longer	True_Long	483.3	False_Long	562.3	True	_Long	Oddball
12	14101	longer	True_Long	591.7	True_Long	1410.1	True	_Long	Oddball
12	13103	shorter	False_Short	666.7	True_Long	1310.3	False	_Short	Oddball
12	11662	shorter	True_Short	475	False_Short	1166.2	True	_Short	Oddball
12	8068	longer	True_Short	600	True_Short	806.8	True	_Short	Oddball
12	11165	shorter	True_Long	400	True_Short	1116.5	True	_Long	Oddball
12	14731	shorter	True_Short	550	True_Long	1473.1	True	_Short	Oddball
12	13103	longer	False_Short	583.3	True_Short	1310.3	False	_Short	Oddball
12	8780	shorter	True_Long	641.7	False_Short	878	True	_Long	Oddball
12	8108	shorter	True_Long	550	True_Long	810.8	True	_Long	Oddball
12	13885	longer	False_Long	491.6	True_Long	1388.5	False	_Long	Oddball
12	10085	longer	True_Long	658.3	False_Long	1008.5	True	_Long	Oddball
12	9752	shorter	True_Long	566.6	True_Long	975.2	True	_Long	Oddball
12	20522	shorter	False_Short	483.3	True_Long	2052.2	False	_Short	Oddball
12	5694	longer	True_Long	558.3	False_Short	569.4	True	_Long	Oddball
12	7846	longer	True_Long	400	True_Long	784.6	True	_Long	Oddball
12	3426	longer	True_Short	650	True_Long	342.6	True	_Short	Oddball
12	6582	shorter	True_Short	550	True_Short	658.2	True	_Short	Oddball
12	14682	shorter	True_Short	475	True_Short	1468.2	True	_Short	Oddball
12	15199	shorter	True_Long	583.3	True_Short	1519.9	True	_Long	Oddball
12	5939	longer	False_Long	575	True_Long	593.9	False	_Long	Oddball
12	11292	longer	True_Short	458.3	False_Short	1129.2	True	_Short	Oddball
12	13776	longer	False_Long	608.3	True_Short	1377.6	False	_Long	Oddball
12	6719	shorter	False_Short	450	False_Long	671.9	False	_Short	Oddball
12	5555	longer	True_Short	625	False_Short	555.5	True	_Short	Oddball
12	14428	longer	False_Short	650	True_Short	1442.8	False	_Short	Oddball
12	8135	longer	True_Long	633.3	False_Short	813.5	True	_Long	Oddball
12	8924	longer	True_Short	600	True_Long	892.4	True	_Short	Oddball
12	5512	shorter	False_Long	383.3	True_Short	551.2	False	_Long	Oddball
12	12963	longer	True_Long	566.7	False_Long	1296.3	True	_Long	Oddball
12	6779	shorter	True_Short	350	True_Long	677.9	True	_Short	Oddball
12	10123	longer	True_Long	508.3	True_Short	1012.3	True	_Long	Oddball
12	12999	shorter	True_Short	583.3	True_Long	1299.9	True	_Short	Oddball
12	7010	shorter	False_Long	416.6	True_Short	701	False	_Long	Oddball
12	14489	shorter	True_Short	583.3	False_Long	1448.9	True	_Short	Oddball
12	7880	longer	True_Long	416.6	True_Short	788	True	_Long	Oddball
12	8513	shorter	True_Short	416.6	True_Long	851.3	True	_Short	Oddball
12	4546	longer	True_Short	650	True_Short	454.6	True	_Short	Oddball
12	8534	shorter	True_Long	325	True_Short	853.4	True	_Long	Oddball
12	6045	longer	True_Long	516.6	True_Long	604.5	True	_Long	Oddball
12	9989	longer	True_Long	483.3	True_Long	998.9	True	_Long	Oddball
12	5270	shorter	True_Long	341.6	True_Long	527	True	_Long	Oddball
12	9515	shorter	False_Long	408.3	True_Long	951.5	False	_Long	Oddball
12	5606	longer	True_Long	566.7	False_Long	560.6	True	_Long	Oddball
12	8880	longer	True_Long	600	True_Long	888	True	_Long	Oddball
12	5068	shorter	False_Long	391.6	True_Long	506.8	False	_Long	Oddball
12	11438	shorter	False_Short	558.3	False_Long	1143.8	False	_Short	Oddball
12	5040	longer	True_Short	633.3	False_Short	504	True	_Short	Oddball
12	5824	shorter	True_Short	325	True_Short	582.4	True	_Short	Oddball
12	7002	longer	True_Long	416.6	True_Short	700.2	True	_Long	Oddball
12	4938	longer	True_Short	641.7	True_Long	493.8	True	_Short	Oddball
12	9562	shorter	True_Short	533.3	True_Short	956.2	True	_Short	Oddball
12	6966	shorter	True_Long	483.3	True_Short	696.6	True	_Long	Oddball
12	11745	shorter	False_Short	541.7	True_Long	1174.5	False	_Short	Oddball
12	2592	longer	True_Long	641.7	True_Long	259.2	True	_Long	Oddball
12	4590	shorter	True_Short	333.3	True_Long	459	True	_Short	Oddball
12	3031	longer	True_Long	583.3	True_Short	303.1	True	_Long	Oddball
12	3631	longer	True_Short	583.3	True_Long	363.1	True	_Short	Oddball
12	5626	longer	True_Long	600	True_Short	562.6	True	_Long	Oddball
12	5544	longer	False_Long	591.7	True_Long	554.4	False	_Long	Oddball
12	7345	shorter	True_Long	491.6	False_Long	734.5	True	_Long	Oddball
12	5128	shorter	True_Short	391.6	True_Long	512.8	True	_Short	Oddball
12	6428	longer	True_Short	625	True_Short	642.8	True	_Short	Oddball
12	7848	longer	True_Short	591.7	True_Short	784.8	True	_Short	Oddball
12	3236	shorter	True_Long	491.6	True_Short	323.6	True	_Long	Oddball
12	4356	longer	True_Short	658.3	True_Long	435.6	True	_Short	Oddball
12	6286	shorter	True_Short	325	True_Short	628.6	True	_Short	Oddball
12	7143	shorter	False_Short	416.6	True_Short	714.3	False	_Short	Oddball
12	3527	longer	True_Long	675	False_Short	352.7	True	_Long	Oddball
12	5047	shorter	False_Short	633.3	True_Long	504.7	False	_Short	Oddball
12	8095	longer	True_Long	425	False_Short	809.5	True	_Long	Oddball
12	6995	longer	True_Short	525	True_Long	699.5	True	_Short	Oddball
12	6772	shorter	False_Short	441.6	True_Short	677.2	False	_Short	Oddball
12	5158	shorter	True_Short	341.6	False_Short	515.8	True	_Short	Oddball
12	3166	longer	True_Long	608.3	True_Short	316.6	True	_Long	Oddball
12	5064	longer	False_Long	483.3	True_Long	506.4	False	_Long	Oddball
12	5544	shorter	True_Short	483.3	False_Long	554.4	True	_Short	Oddball
12	3799	longer	False_Long	558.3	True_Short	379.9	False	_Long	Oddball
12	12020	shorter	True_Long	616.7	False_Long	1202	True	_Long	Oddball
12	7870	shorter	False_Short	358.3	True_Long	787	False	_Short	Oddball
12	3191	longer	False_Long	658.3	False_Short	319.1	False	_Long	Oddball
12	4382	shorter	False_Long	450	False_Long	438.2	False	_Long	Oddball
12	7780	shorter	True_Long	416.6	False_Long	778	True	_Long	Oddball
12	8400	shorter	True_Short	458.3	True_Long	840	True	_Short	Oddball
12	4791	longer	True_Long	533.3	True_Short	479.1	True	_Long	Oddball
12	12157	longer	True_Short	491.6	True_Long	1215.7	True	_Short	Oddball
12	5877	shorter	False_Short	466.6	True_Short	587.7	False	_Short	Oddball
12	8902	longer	True_Long	475	True_Short	890.2	True	_Long	Oddball
12	7881	longer	False_Short	650	True_Long	788.1	False	_Short	Oddball
12	5224	longer	True_Short	641.7	False_Short	522.4	True	_Short	Oddball
12	5459	longer	True_Long	641.7	True_Short	545.9	True	_Long	Oddball
12	6403	shorter	False_Long	441.6	True_Long	640.3	False	_Long	Oddball
12	6480	shorter	True_Short	350	False_Long	648	True	_Short	Oddball
12	6327	longer	True_Short	525	True_Short	632.7	True	_Short	Oddball
12	4948	longer	True_Long	558.3	True_Short	494.8	True	_Long	Oddball
12	5441	shorter	True_Short	458.3	True_Long	544.1	True	_Short	Oddball
12	3259	longer	True_Long	658.3	True_Short	325.9	True	_Long	Oddball
12	7303	shorter	False_Short	550	True_Long	730.3	False	_Short	Oddball
12	5897	shorter	True_Long	533.3	False_Short	589.7	True	_Long	Oddball
12	6515	shorter	False_Long	416.6	True_Long	651.5	False	_Long	Oddball
12	9652	longer	True_Long	650	False_Long	965.2	True	_Long	Oddball
12	7115	shorter	True_Short	558.3	True_Long	711.5	True	_Short	Oddball
12	7343	shorter	True_Long	466.6	True_Short	734.3	True	_Long	Oddball
12	6400	shorter	True_Short	408.3	True_Long	640	True	_Short	Oddball
12	3051	longer	True_Long	483.3	True_Short	305.1	True	_Long	Oddball
12	3049	shorter	False_Long	450	True_Long	304.9	False	_Long	Oddball
12	7549	longer	False_Short	633.3	False_Long	754.9	False	_Short	Oddball
12	6504	shorter	False_Long	408.3	False_Short	650.4	False	_Long	Oddball
12	6587	shorter	True_Short	325	False_Long	658.7	True	_Short	Oddball
12	9174	longer	True_Short	458.3	True_Short	917.4	True	_Short	Oddball
12	8503	shorter	False_Short	541.7	True_Short	850.3	False	_Short	Oddball
12	4610	longer	True_Short	666.7	False_Short	461	True	_Short	Oddball
12	6658	shorter	True_Long	366.6	True_Short	665.8	True	_Long	Oddball
12	3646	longer	True_Long	408.3	True_Long	364.6	True	_Long	Oddball
12	5292	shorter	True_Short	508.3	True_Long	529.2	True	_Short	Oddball
12	5243	longer	True_Short	583.3	True_Short	524.3	True	_Short	Oddball
12	3527	longer	True_Long	508.3	True_Short	352.7	True	_Long	Oddball
12	6164	longer	False_Short	641.7	True_Long	616.4	False	_Short	Oddball
12	2205	longer	False_Long	625	False_Short	220.5	False	_Long	Oddball
12	2767	shorter	True_Long	325	False_Long	276.7	True	_Long	Oddball
12	3332	longer	True_Long	583.3	True_Short	333.2	True	_Long	Oddball
12	6729	shorter	True_Short	558.3	True_Long	672.9	True	_Short	Oddball
12	5627	longer	True_Long	633.3	True_Short	562.7	True	_Long	Oddball
12	6268	longer	True_Long	583.3	True_Long	626.8	True	_Long	Oddball
12	9148	shorter	False_Short	558.3	True_Long	914.8	False	_Short	Oddball
12	8727	shorter	True_Short	525	False_Short	872.7	True	_Short	Oddball
12	6373	longer	True_Short	600	True_Short	637.3	True	_Short	Oddball
12	6670	longer	True_Short	608.3	True_Short	667	True	_Short	Oddball
12	7873	shorter	False_Short	508.3	True_Short	787.3	False	_Short	Oddball
12	5711	shorter	False_Long	366.6	False_Short	571.1	False	_Long	Oddball
12	5169	longer	True_Long	533.3	False_Long	516.9	True	_Long	Oddball
12	7013	longer	True_Long	616.7	True_Long	701.3	True	_Long	Oddball
12	6000	longer	True_Short	616.7	True_Long	600	True	_Short	Oddball
12	9031	shorter	True_Long	566.7	True_Short	903.1	True	_Long	Oddball
12	10801	shorter	True_Long	416.6	True_Long	1080.1	True	_Long	Oddball
12	4062	shorter	False_Long	516.6	True_Long	406.2	False	_Long	Oddball
12	4599	longer	True_Short	641.7	False_Long	459.9	True	_Short	Oddball
12	6884	shorter	False_Long	375	True_Short	688.4	False	_Long	Oddball
12	7625	longer	False_Long	608.3	False_Long	762.5	False	_Long	Oddball
12	6889	shorter	True_Long	425	False_Long	688.9	True	_Long	Oddball
12	7546	shorter	True_Short	458.3	True_Long	754.6	True	_Short	Oddball
12	4817	longer	True_Long	616.7	True_Short	481.7	True	_Long	Oddball
12	3207	shorter	True_Short	333.3	True_Long	320.7	True	_Short	Oddball
12	4465	longer	True_Long	483.3	True_Short	446.5	True	_Long	Oddball
12	4105	longer	True_Short	641.7	True_Long	410.5	True	_Short	Oddball
12	5825	shorter	False_Short	475	True_Short	582.5	False	_Short	Oddball
12	6802	shorter	False_Short	358.3	False_Short	680.2	False	_Short	Oddball
12	13650	longer	True_Long	350	False_Short	1365	True	_Long	Oddball
12	7047	shorter	True_Long	491.6	True_Long	704.7	True	_Long	Oddball
12	6724	shorter	False_Short	491.6	True_Long	672.4	False	_Short	Oddball
12	5957	shorter	True_Short	433.3	False_Short	595.7	True	_Short	Oddball
12	9948	shorter	False_Long	375	True_Short	994.8	False	_Long	Oddball
12	6745	shorter	True_Short	400	False_Long	674.5	True	_Short	Oddball
13	3725	longer	True_Long	616.7	True_Short	372.5	True	_Long	Oddball
13	6299	shorter	True_Short	383.3	True_Long	629.9	True	_Short	Oddball
13	8657	shorter	False_Long	425	True_Short	865.7	False	_Long	Oddball
13	5748	shorter	True_Long	350	False_Long	574.8	True	_Long	Oddball
13	12784	longer	True_Short	416.6	True_Long	1278.4	True	_Short	Oddball
13	10237	shorter	False_Short	475	True_Short	1023.7	False	_Short	Oddball
13	4964	longer	True_Long	500	False_Short	496.4	True	_Long	Oddball
13	4063	longer	False_Long	508.3	True_Long	406.3	False	_Long	Oddball
13	6126	longer	True_Short	625	False_Long	612.6	True	_Short	Oddball
13	5100	longer	True_Long	500	True_Short	510	True	_Long	Oddball
13	5555	longer	True_Long	500	True_Long	555.5	True	_Long	Oddball
13	5763	shorter	False_Long	475	True_Long	576.3	False	_Long	Oddball
13	10994	longer	True_Long	491.6	False_Long	1099.4	True	_Long	Oddball
13	6684	shorter	True_Short	458.3	True_Long	668.4	True	_Short	Oddball
13	2891	longer	True_Long	558.3	True_Short	289.1	True	_Long	Oddball
13	5103	shorter	True_Long	333.3	True_Long	510.3	True	_Long	Oddball
13	3833	longer	True_Short	650	True_Long	383.3	True	_Short	Oddball
13	2856	longer	True_Short	641.7	True_Short	285.6	True	_Short	Oddball
13	3850	longer	True_Short	616.7	True_Short	385	True	_Short	Oddball
13	3735	longer	True_Long	650	True_Short	373.5	True	_Long	Oddball
13	3529	shorter	True_Short	333.3	True_Long	352.9	True	_Short	Oddball
13	2439	longer	True_Short	558.3	True_Short	243.9	True	_Short	Oddball
13	3782	longer	True_Short	583.3	True_Short	378.2	True	_Short	Oddball
13	2877	longer	False_Long	633.3	True_Short	287.7	False	_Long	Oddball
13	10367	longer	False_Short	575	False_Long	1036.7	False	_Short	Oddball
13	13033	longer	True_Short	483.3	False_Short	1303.3	True	_Short	Oddball
13	4780	shorter	True_Long	475	True_Short	478	True	_Long	Oddball
13	3055	longer	False_Long	583.3	True_Long	305.5	False	_Long	Oddball
13	6192	shorter	False_Short	441.6	False_Long	619.2	False	_Short	Oddball
13	1817	longer	True_Long	666.7	False_Short	181.7	True	_Long	Oddball
13	3044	longer	False_Short	541.7	True_Long	304.4	False	_Short	Oddball
13	3268	longer	False_Long	525	True_Long	326.8	False	_Long	Oddball
13	5981	shorter	False_Short	475	False_Long	598.1	False	_Short	Oddball
13	6941	shorter	True_Short	391.6	False_Short	694.1	True	_Short	Oddball
13	4735	shorter	True_Short	408.3	True_Short	473.5	True	_Short	Oddball
13	6593	longer	True_Long	433.3	True_Short	659.3	True	_Long	Oddball
13	3278	longer	False_Long	575	True_Long	327.8	False	_Long	Oddball
13	3277	longer	False_Short	658.3	False_Long	327.7	False	_Short	Oddball
13	4616	shorter	False_Long	475	False_Short	461.6	False	_Long	Oddball
13	230	longer	True_Long	650	False_Long	23	True	_Long	Oddball
13	3496	shorter	True_Long	366.6	True_Long	349.6	True	_Long	Oddball
13	3704	longer	True_Long	475	True_Long	370.4	True	_Long	Oddball
13	2667	longer	True_Short	608.3	True_Long	266.7	True	_Short	Oddball
13	10431	longer	True_Short	508.3	True_Short	1043.1	True	_Short	Oddball
13	7322	shorter	True_Long	475	True_Short	732.2	True	_Long	Oddball
13	3202	longer	True_Short	550	True_Long	320.2	True	_Short	Oddball
13	5472	longer	True_Short	591.7	True_Short	547.2	True	_Short	Oddball
13	2089	longer	True_Long	658.3	True_Short	208.9	True	_Long	Oddball
13	5343	shorter	True_Short	441.6	True_Long	534.3	True	_Short	Oddball
13	4215	shorter	True_Long	433.3	True_Short	421.5	True	_Long	Oddball
13	10871	shorter	False_Short	525	True_Long	1087.1	False	_Short	Oddball
13	4168	shorter	False_Short	458.3	False_Short	416.8	False	_Short	Oddball
13	1991	longer	True_Short	608.3	False_Short	199.1	True	_Short	Oddball
13	4176	longer	False_Long	483.3	True_Short	417.6	False	_Long	Oddball
13	2604	longer	False_Long	658.3	False_Long	260.4	False	_Long	Oddball
13	6116	shorter	True_Long	508.3	False_Long	611.6	True	_Long	Oddball
13	5029	shorter	True_Short	491.6	True_Long	502.9	True	_Short	Oddball
13	8654	shorter	True_Long	383.3	True_Short	865.4	True	_Long	Oddball
13	2861	shorter	True_Long	358.3	True_Long	286.1	True	_Long	Oddball
13	14331	shorter	True_Short	425	True_Long	1433.1	True	_Short	Oddball
13	2707	longer	True_Short	608.3	True_Short	270.7	True	_Short	Oddball
13	2168	longer	True_Short	666.7	True_Short	216.8	True	_Short	Oddball
13	5116	shorter	True_Long	358.3	True_Short	511.6	True	_Long	Oddball
13	4820	shorter	False_Short	416.6	True_Long	482	False	_Short	Oddball
13	3067	shorter	False_Long	458.3	True_Long	306.7	False	_Long	Oddball
13	3910	longer	True_Short	575	False_Long	391	True	_Short	Oddball
13	3824	shorter	False_Short	408.3	True_Short	382.4	False	_Short	Oddball
13	2935	longer	True_Long	583.3	False_Short	293.5	True	_Long	Oddball
13	3749	shorter	True_Short	658.3	True_Long	374.9	True	_Short	Oddball
13	4809	shorter	True_Short	358.3	True_Short	480.9	True	_Short	Oddball
13	6327	shorter	True_Long	475	True_Short	632.7	True	_Long	Oddball
13	1952	longer	True_Long	450	True_Long	195.2	True	_Long	Oddball
13	2251	shorter	True_Long	408.3	True_Long	225.1	True	_Long	Oddball
13	3271	longer	True_Short	608.3	True_Long	327.1	True	_Short	Oddball
13	2226	longer	True_Long	633.3	True_Short	222.6	True	_Long	Oddball
13	3646	shorter	False_Short	416.6	True_Long	364.6	False	_Short	Oddball
13	4710	shorter	True_Short	366.6	False_Short	471	True	_Short	Oddball
13	2854	shorter	True_Short	358.3	True_Short	285.4	True	_Short	Oddball
13	1987	longer	False_Short	666.7	True_Short	198.7	False	_Short	Oddball
13	4611	shorter	True_Short	425	False_Short	461.1	True	_Short	Oddball
13	13095	longer	True_Long	475	True_Short	1309.5	True	_Long	Oddball
13	4915	shorter	False_Short	325	True_Long	491.5	False	_Short	Oddball
13	5572	longer	True_Short	650	False_Short	557.2	True	_Short	Oddball
13	3853	shorter	True_Long	483.3	True_Short	385.3	True	_Long	Oddball
13	14021	longer	False_Long	541.6	True_Long	1402.1	False	_Long	Oddball
13	3550	shorter	False_Short	358.3	False_Long	355	False	_Short	Oddball
13	1857	longer	True_Short	666.7	False_Short	185.7	True	_Short	Oddball
13	3245	longer	True_Long	491.6	True_Short	324.5	True	_Long	Oddball
13	3874	shorter	True_Long	450	True_Long	387.4	True	_Long	Oddball
13	3968	longer	False_Long	525	True_Long	396.8	False	_Long	Oddball
13	4389	shorter	True_Short	341.6	False_Long	438.9	True	_Short	Oddball
13	1514	longer	False_Long	500	True_Short	151.4	False	_Long	Oddball
13	3114	shorter	True_Short	433.3	False_Long	311.4	True	_Short	Oddball
13	3706	shorter	True_Long	358.3	True_Short	370.6	True	_Long	Oddball
13	4170	longer	True_Short	458.3	True_Long	417	True	_Short	Oddball
13	2721	longer	False_Long	550	True_Short	272.1	False	_Long	Oddball
13	7396	shorter	True_Long	591.7	False_Long	739.6	True	_Long	Oddball
13	1872	longer	False_Long	583.3	True_Short	187.2	False	_Long	Oddball
13	3259	shorter	True_Short	533.3	False_Long	325.9	True	_Short	Oddball
13	4140	shorter	True_Long	416.6	True_Short	414	True	_Long	Oddball
13	7628	longer	True_Long	416.6	True_Long	762.8	True	_Long	Oddball
13	3368	shorter	True_Short	475	True_Long	336.8	True	_Short	Oddball
13	11128	longer	False_Short	450	True_Short	1112.8	False	_Short	Oddball
13	3809	shorter	True_Long	333.3	False_Short	380.9	True	_Long	Oddball
13	2439	longer	True_Short	633.3	True_Long	243.9	True	_Short	Oddball
13	2023	longer	True_Short	583.3	True_Short	202.3	True	_Short	Oddball
13	1755	longer	False_Long	616.7	True_Short	175.5	False	_Long	Oddball
13	2293	longer	False_Long	625	False_Long	229.3	False	_Long	Oddball
13	2324	shorter	True_Short	483.3	False_Long	232.4	True	_Short	Oddball
13	2199	longer	True_Long	425	True_Short	219.9	True	_Long	Oddball
13	2234	longer	True_Long	641.7	True_Long	223.4	True	_Long	Oddball
13	3972	shorter	False_Long	383.3	True_Long	397.2	False	_Long	Oddball
13	3436	shorter	False_Short	333.3	False_Long	343.6	False	_Short	Oddball
13	3930	shorter	True_Short	408.3	False_Short	393	True	_Short	Oddball
13	6528	longer	True_Long	458.3	True_Short	652.8	True	_Long	Oddball
13	11637	longer	True_Short	558.3	True_Long	1163.7	True	_Short	Oddball
13	10501	longer	False_Long	625	True_Short	1050.1	False	_Long	Oddball
13	4152	shorter	True_Long	366.6	False_Long	415.2	True	_Long	Oddball
13	5232	longer	False_Short	666.7	True_Long	523.2	False	_Short	Oddball
13	4505	shorter	True_Short	483.3	False_Short	450.5	True	_Short	Oddball
13	2617	longer	True_Long	616.7	True_Short	261.7	True	_Long	Oddball
13	4225	longer	True_Long	466.6	True_Long	422.5	True	_Long	Oddball
13	2416	longer	True_Long	650	True_Long	241.6	True	_Long	Oddball
13	3673	shorter	False_Short	400	True_Long	367.3	False	_Short	Oddball
13	3174	longer	True_Short	666.7	False_Short	317.4	True	_Short	Oddball
13	3517	shorter	True_Short	408.3	True_Short	351.7	True	_Short	Oddball
13	6156	shorter	True_Long	400	True_Short	615.6	True	_Long	Oddball
13	3439	shorter	False_Short	358.3	True_Long	343.9	False	_Short	Oddball
13	8083	longer	True_Short	433.3	False_Short	808.3	True	_Short	Oddball
13	2470	longer	True_Long	566.7	True_Short	247	True	_Long	Oddball
13	2990	longer	True_Long	525	False_Short	299	True	_Long	Oddball
13	3084	longer	False_Long	408.3	True_Long	308.4	False	_Long	Oddball
13	2953	longer	True_Long	566.7	False_Long	295.3	True	_Long	Oddball
13	5900	shorter	True_Short	325	True_Long	590	True	_Short	Oddball
13	6506	shorter	True_Short	483.3	True_Short	650.6	True	_Short	Oddball
13	9771	longer	False_Long	533.3	True_Short	977.1	False	_Long	Oddball
13	2884	longer	False_Short	625	False_Long	288.4	False	_Short	Oddball
13	2607	longer	True_Short	591.7	False_Short	260.7	True	_Short	Oddball
13	2886	longer	True_Long	591.7	True_Short	288.6	True	_Long	Oddball
13	10580	longer	False_Long	425	True_Long	1058	False	_Long	Oddball
13	6000	shorter	True_Short	375	False_Long	600	True	_Short	Oddball
13	2768	shorter	True_Long	425	True_Short	276.8	True	_Long	Oddball
13	5722	shorter	True_Short	525	True_Long	572.2	True	_Short	Oddball
13	182	longer	False_Short	666.7	True_Short	18.2	False	_Short	Oddball
13	2952	longer	True_Short	641.7	False_Short	295.2	True	_Short	Oddball
13	1740	longer	True_Long	483.3	True_Short	174	True	_Long	Oddball
13	2802	longer	True_Long	516.7	True_Long	280.2	True	_Long	Oddball
13	2094	longer	True_Long	641.7	True_Long	209.4	True	_Long	Oddball
13	3942	longer	True_Long	516.6	True_Long	394.2	True	_Long	Oddball
13	1535	longer	True_Short	608.3	True_Long	153.5	True	_Short	Oddball
13	4541	shorter	True_Long	483.3	True_Short	454.1	True	_Long	Oddball
13	2232	longer	True_Long	666.7	True_Long	223.2	True	_Long	Oddball
13	2287	longer	False_Long	591.7	True_Long	228.7	False	_Long	Oddball
13	2334	shorter	False_Short	441.6	False_Long	233.4	False	_Short	Oddball
13	2221	longer	True_Short	633.3	False_Short	222.1	True	_Short	Oddball
13	2418	longer	True_Short	675	True_Short	241.8	True	_Short	Oddball
13	5819	shorter	False_Long	400	True_Short	581.9	False	_Long	Oddball
13	13113	shorter	True_Short	366.6	False_Long	1311.3	True	_Short	Oddball
13	5869	shorter	True_Short	383.3	True_Short	586.9	True	_Short	Oddball
13	6097	shorter	True_Long	391.6	True_Short	609.7	True	_Long	Oddball
13	10267	shorter	False_Short	350	True_Long	1026.7	False	_Short	Oddball
13	4730	shorter	True_Short	400	False_Short	473	True	_Short	Oddball
13	1911	longer	True_Long	525	True_Short	191.1	True	_Long	Oddball
13	3107	longer	True_Short	525	True_Long	310.7	True	_Short	Oddball
13	7417	longer	True_Short	500	True_Short	741.7	True	_Short	Oddball
13	2511	longer	False_Long	666.7	True_Short	251.1	False	_Long	Oddball
13	3696	shorter	False_Long	333.3	False_Long	369.6	False	_Long	Oddball
13	2658	longer	True_Long	375	False_Long	265.8	True	_Long	Oddball
13	10395	shorter	True_Short	575	True_Long	1039.5	True	_Short	Oddball
13	1545	longer	True_Long	633.3	True_Short	154.5	True	_Long	Oddball
13	4277	shorter	False_Long	366.6	True_Long	427.7	False	_Long	Oddball
13	9352	longer	True_Long	633.3	False_Long	935.2	True	_Long	Oddball
13	6255	longer	True_Short	391.6	True_Long	625.5	True	_Short	Oddball
13	2783	shorter	False_Long	600	True_Short	278.3	False	_Long	Oddball
13	2226	longer	True_Short	500	False_Long	222.6	True	_Short	Oddball
13	735	shorter	True_Long	458.3	True_Short	73.5	True	_Long	Oddball
13	6109	longer	True_Long	641.7	True_Long	610.9	True	_Long	Oddball
13	6890	shorter	False_Short	425	True_Long	689	False	_Short	Oddball
13	4464	shorter	True_Long	525	False_Short	446.4	True	_Long	Oddball
13	6587	longer	True_Short	633.3	True_Long	658.7	True	_Short	Oddball
13	8301	shorter	False_Short	441.6	True_Short	830.1	False	_Short	Oddball
13	2577	longer	False_Short	466.6	False_Short	257.7	False	_Short	Oddball
13	4861	longer	True_Short	616.7	False_Short	486.1	True	_Short	Oddball
13	19722	shorter	True_Short	425	True_Short	1972.2	True	_Short	Oddball
13	9631	shorter	True_Short	441.6	True_Short	963.1	True	_Short	Oddball
13	4509	shorter	True_Long	391.6	True_Short	450.9	True	_Long	Oddball
13	2679	longer	False_Short	508.3	True_Long	267.9	False	_Short	Oddball
13	2554	longer	False_Long	391.6	False_Short	255.4	False	_Long	Oddball
13	5581	shorter	True_Short	366.6	False_Long	558.1	True	_Short	Oddball
13	3265	longer	False_Short	616.7	True_Short	326.5	False	_Short	Oddball
13	3862	shorter	True_Short	366.6	False_Short	386.2	True	_Short	Oddball
13	6370	shorter	True_Long	491.6	True_Short	637	True	_Long	Oddball
13	3247	shorter	True_Short	358.3	True_Long	324.7	True	_Short	Oddball
13	255	shorter	True_Long	500	True_Short	25.5	True	_Long	Oddball
13	7914	shorter	True_Long	375	True_Long	791.4	True	_Long	Oddball
13	2708	shorter	True_Long	366.6	True_Long	270.8	True	_Long	Oddball
13	1876	longer	True_Long	558.3	True_Long	187.6	True	_Long	Oddball
13	3850	shorter	True_Short	466.6	True_Long	385	True	_Short	Oddball
13	2550	longer	True_Short	650	True_Short	255	True	_Short	Oddball
13	3088	shorter	True_Long	550	True_Short	308.8	True	_Long	Oddball
13	2656	longer	True_Long	516.6	True_Long	265.6	True	_Long	Oddball
13	3091	shorter	False_Long	391.6	True_Long	309.1	False	_Long	Oddball
13	1368	shorter	True_Short	583.3	False_Long	136.8	True	_Short	Oddball
13	6149	longer	True_Short	500	True_Short	614.9	True	_Short	Oddball
13	4072	shorter	True_Short	366.6	True_Short	407.2	True	_Short	Oddball
13	7349	shorter	False_Short	583.3	True_Short	734.9	False	_Short	Oddball
13	3063	longer	True_Long	525	False_Short	306.3	True	_Long	Oddball
13	3341	longer	True_Short	391.6	True_Long	334.1	True	_Short	Oddball
13	1355	longer	True_Long	575	True_Short	135.5	True	_Long	Oddball
13	3173	shorter	True_Short	508.3	True_Long	317.3	True	_Short	Oddball
13	3286	shorter	False_Short	383.3	True_Short	328.6	False	_Short	Oddball
13	3137	shorter	False_Short	433.3	False_Short	313.7	False	_Short	Oddball
13	3817	shorter	True_Short	575	False_Short	381.7	True	_Short	Oddball
13	5659	shorter	True_Long	366.6	True_Short	565.9	True	_Long	Oddball
13	4402	shorter	False_Short	358.3	True_Long	440.2	False	_Short	Oddball
13	3099	longer	True_Short	600	False_Short	309.9	True	_Short	Oddball
13	3204	shorter	False_Long	375	True_Short	320.4	False	_Long	Oddball
13	8264	longer	False_Short	616.7	False_Long	826.4	False	_Short	Oddball
13	3804	longer	True_Short	508.3	False_Short	380.4	True	_Short	Oddball
13	1312	shorter	False_Long	600	True_Short	131.2	False	_Long	Oddball
13	3333	shorter	True_Short	408.3	False_Long	333.3	True	_Short	Oddball
13	2081	shorter	False_Long	541.7	True_Short	208.1	False	_Long	Oddball
13	1090	shorter	True_Long	416.6	False_Long	109	True	_Long	Oddball
13	6111	longer	True_Long	483.3	True_Long	611.1	True	_Long	Oddball
13	2273	longer	False_Long	533.3	True_Long	227.3	False	_Long	Oddball
13	2546	longer	True_Short	675	False_Long	254.6	True	_Short	Oddball
13	5164	shorter	True_Long	550	True_Short	516.4	True	_Long	Oddball
13	5479	shorter	True_Long	441.6	True_Long	547.9	True	_Long	Oddball
13	2977	longer	True_Long	450	True_Short	297.7	True	_Long	Oddball
13	2178	longer	True_Long	650	True_Long	217.8	True	_Long	Oddball
13	1337	shorter	False_Long	433.3	True_Long	133.7	False	_Long	Oddball
13	2079	shorter	True_Long	558.3	False_Long	207.9	True	_Long	Oddball
13	3059	longer	False_Short	525	True_Long	305.9	False	_Short	Oddball
13	2754	shorter	True_Long	408.3	False_Short	275.4	True	_Long	Oddball
13	12887	longer	True_Short	575	True_Long	1288.7	True	_Short	Oddball
13	3590	shorter	False_Short	341.6	True_Short	359	False	_Short	Oddball
13	2787	longer	True_Short	633.3	False_Short	278.7	True	_Short	Oddball
13	10047	longer	True_Short	358.3	True_Short	1004.7	True	_Short	Oddball
13	10768	longer	False_Long	541.7	True_Short	1076.8	False	_Long	Oddball
13	1432	longer	True_Long	608.3	False_Long	143.2	True	_Long	Oddball
13	2067	longer	False_Long	616.7	True_Long	206.7	False	_Long	Oddball
13	2185	longer	True_Long	650	False_Long	218.5	True	_Long	Oddball
13	3457	shorter	True_Long	350	True_Long	345.7	True	_Long	Oddball
13	1612	longer	True_Long	616.7	True_Long	161.2	True	_Long	Oddball
13	2642	longer	False_Short	650	True_Long	264.2	False	_Short	Oddball
13	2531	longer	True_Long	566.7	False_Short	253.1	True	_Long	Oddball
13	2139	longer	True_Long	475	True_Long	213.9	True	_Long	Oddball
13	2994	shorter	True_Long	400	True_Long	299.4	True	_Long	Oddball
13	10635	shorter	False_Long	541.7	True_Long	1063.5	False	_Long	Oddball
13	9981	longer	True_Short	558.3	False_Long	998.1	True	_Short	Oddball
13	10417	longer	True_Short	500	True_Short	1041.7	True	_Short	Oddball
13	4527	shorter	True_Short	466.6	True_Short	452.7	True	_Short	Oddball
13	2555	shorter	False_Long	425	True_Short	255.5	False	_Long	Oddball
13	8595	longer	True_Short	433.3	False_Long	859.5	True	_Short	Oddball
13	12195	shorter	True_Short	525	True_Short	1219.5	True	_Short	Oddball
13	4285	shorter	True_Short	341.6	True_Short	428.5	True	_Short	Oddball
13	4085	longer	False_Short	458.3	True_Short	408.5	False	_Short	Oddball
13	2712	longer	True_Short	608.3	False_Short	271.2	True	_Short	Oddball
13	2422	longer	False_Short	641.7	True_Short	242.2	False	_Short	Oddball
13	3086	longer	True_Short	483.3	False_Short	308.6	True	_Short	Oddball
13	6927	shorter	True_Long	433.3	True_Short	692.7	True	_Long	Oddball
13	168	longer	True_Long	566.7	True_Long	16.8	True	_Long	Oddball
13	1665	longer	False_Short	425	True_Long	166.5	False	_Short	Oddball
13	3303	shorter	True_Short	325	False_Short	330.3	True	_Short	Oddball
13	1421	shorter	True_Long	325	True_Short	142.1	True	_Long	Oddball
13	9212	shorter	True_Short	366.6	True_Long	921.2	True	_Short	Oddball
13	3126	longer	True_Long	641.7	True_Short	312.6	True	_Long	Oddball
13	12296	shorter	True_Short	550	True_Long	1229.6	True	_Short	Oddball
13	2110	longer	False_Long	583.3	True_Short	211	False	_Long	Oddball
13	1978	shorter	True_Long	466.6	False_Long	197.8	True	_Long	Oddball
13	7967	shorter	False_Long	383.3	True_Long	796.7	False	_Long	Oddball
13	691	shorter	True_Long	541.7	False_Long	69.1	True	_Long	Oddball
13	6402	longer	True_Short	441.6	True_Long	640.2	True	_Short	Oddball
13	2730	shorter	False_Long	491.6	True_Short	273	False	_Long	Oddball
13	10996	longer	True_Short	450	False_Long	1099.6	True	_Short	Oddball
13	4106	longer	True_Short	508.3	True_Short	410.6	True	_Short	Oddball
13	3470	shorter	True_Short	366.6	True_Short	347	True	_Short	Oddball
13	3908	shorter	True_Long	508.3	True_Short	390.8	True	_Long	Oddball
13	6445	shorter	False_Short	450	True_Long	644.5	False	_Short	Oddball
13	4921	shorter	True_Short	550	False_Short	492.1	True	_Short	Oddball
13	1985	shorter	True_Short	433.3	True_Short	198.5	True	_Short	Oddball
13	5253	shorter	True_Long	575	True_Short	525.3	True	_Long	Oddball
13	3910	shorter	True_Short	416.6	True_Long	391	True	_Short	Oddball
13	4311	shorter	False_Short	391.6	True_Short	431.1	False	_Short	Oddball
13	3089	longer	True_Long	575	False_Short	308.9	True	_Long	Oddball
13	2040	longer	True_Long	658.3	True_Long	204	True	_Long	Oddball
13	342	longer	False_Long	591.7	True_Long	34.2	False	_Long	Oddball
13	5839	shorter	False_Short	408.3	False_Long	583.9	False	_Short	Oddball
13	2420	shorter	False_Long	508.3	False_Short	242	False	_Long	Oddball
13	5574	longer	True_Short	458.3	False_Long	557.4	True	_Short	Oddball
13	2744	longer	False_Short	500	True_Short	274.4	False	_Short	Oddball
13	1346	longer	True_Long	566.7	False_Short	134.6	True	_Long	Oddball
13	8029	longer	True_Short	541.7	True_Long	802.9	True	_Short	Oddball
13	2710	longer	True_Long	641.7	True_Short	271	True	_Long	Oddball
13	1091	longer	True_Long	541.6	True_Long	109.1	True	_Long	Oddball
13	4902	shorter	True_Short	350	True_Long	490.2	True	_Short	Oddball
13	1975	longer	True_Short	608.3	True_Short	197.5	True	_Short	Oddball
13	1076	longer	False_Short	641.7	True_Short	107.6	False	_Short	Oddball
13	8610	longer	True_Long	600	False_Short	861	True	_Long	Oddball
13	4520	shorter	True_Short	550	True_Long	452	True	_Short	Oddball
13	438	longer	False_Long	500	True_Short	43.8	False	_Long	Oddball
13	3562	shorter	True_Short	533.3	False_Long	356.2	True	_Short	Oddball
13	3663	shorter	True_Short	383.3	True_Short	366.3	True	_Short	Oddball
13	5264	shorter	False_Long	375	True_Short	526.4	False	_Long	Oddball
13	1751	longer	True_Short	641.7	False_Long	175.1	True	_Short	Oddball
13	2053	longer	True_Long	616.7	True_Short	205.3	True	_Long	Oddball
13	2907	shorter	True_Short	450	True_Long	290.7	True	_Short	Oddball
13	3912	shorter	True_Long	341.6	True_Short	391.2	True	_Long	Oddball
13	3260	shorter	True_Long	383.3	True_Long	326	True	_Long	Oddball
13	1995	longer	True_Long	583.3	True_Long	199.5	True	_Long	Oddball
13	1883	longer	False_Long	625	True_Long	188.3	False	_Long	Oddball
13	3397	shorter	True_Short	416.6	False_Long	339.7	True	_Short	Oddball
13	3914	longer	True_Short	558.3	True_Short	391.4	True	_Short	Oddball
13	3377	shorter	True_Short	533.3	True_Short	337.7	True	_Short	Oddball
13	1632	longer	False_Long	575	True_Short	163.2	False	_Long	Oddball
13	1296	longer	False_Short	666.7	False_Long	129.6	False	_Short	Oddball
13	6766	shorter	False_Short	383.3	False_Short	676.6	False	_Short	Oddball
13	601	shorter	True_Long	483.3	False_Short	60.1	True	_Long	Oddball
13	3838	shorter	False_Short	433.3	True_Long	383.8	False	_Short	Oddball
13	2245	longer	True_Short	583.3	False_Short	224.5	True	_Short	Oddball
13	1970	longer	True_Long	608.3	True_Short	197	True	_Long	Oddball
13	3312	shorter	True_Long	400	True_Long	331.2	True	_Long	Oddball
13	11966	longer	True_Long	583.3	True_Long	1196.6	True	_Long	Oddball
13	3637	shorter	True_Long	375	True_Long	363.7	True	_Long	Oddball
13	895	longer	False_Long	641.7	True_Long	89.5	False	_Long	Oddball
13	1266	longer	False_Short	575	False_Long	126.6	False	_Short	Oddball
13	1760	longer	True_Short	625	False_Short	176	True	_Short	Oddball
14	3868	longer	True_Short	608.3	True_Long	386.8	True	_Short	Oddball
14	3066	longer	False_Short	608.3	True_Short	306.6	False	_Short	Oddball
14	7604	shorter	False_Short	341.6	False_Short	760.4	False	_Short	Oddball
14	9051	shorter	False_Short	408.3	False_Short	905.1	False	_Short	Oddball
14	8416	shorter	True_Long	433.3	False_Short	841.6	True	_Long	Oddball
14	10405	shorter	True_Long	533.3	True_Long	1040.5	True	_Long	Oddball
14	3720	longer	False_Long	416.6	True_Long	372	False	_Long	Oddball
14	2023	longer	True_Long	625	False_Long	202.3	True	_Long	Oddball
14	3591	shorter	True_Short	466.6	True_Long	359.1	True	_Short	Oddball
14	5673	longer	True_Long	383.3	True_Short	567.3	True	_Long	Oddball
14	5769	longer	True_Long	341.6	True_Long	576.9	True	_Long	Oddball
14	3530	shorter	True_Short	408.3	True_Long	353	True	_Short	Oddball
14	679	longer	True_Long	525	True_Short	67.9	True	_Long	Oddball
14	3740	longer	False_Short	666.7	True_Long	374	False	_Short	Oddball
14	4570	longer	True_Long	500	False_Short	457	True	_Long	Oddball
14	1674	shorter	True_Short	366.6	True_Long	167.4	True	_Short	Oddball
14	2829	longer	True_Short	533.3	True_Short	282.9	True	_Short	Oddball
14	4463	longer	True_Short	616.7	True_Short	446.3	True	_Short	Oddball
14	5892	longer	False_Long	533.3	True_Short	589.2	False	_Long	Oddball
14	5360	shorter	True_Short	333.3	False_Long	536	True	_Short	Oddball
14	142	longer	True_Long	658.3	True_Short	14.2	True	_Long	Oddball
14	3487	shorter	False_Short	416.6	True_Long	348.7	False	_Short	Oddball
14	9349	longer	False_Long	341.6	False_Short	934.9	False	_Long	Oddball
14	5645	longer	True_Long	475	False_Long	564.5	True	_Long	Oddball
14	6067	longer	False_Long	533.3	True_Long	606.7	False	_Long	Oddball
14	4001	shorter	True_Short	350	False_Long	400.1	True	_Short	Oddball
14	14571	longer	True_Long	525	True_Short	1457.1	True	_Long	Oddball
14	547	longer	True_Short	583.3	True_Long	54.7	True	_Short	Oddball
14	4473	shorter	True_Long	483.3	True_Short	447.3	True	_Long	Oddball
14	4032	longer	False_Long	408.3	True_Long	403.2	False	_Long	Oddball
14	4427	shorter	True_Short	400	False_Long	442.7	True	_Short	Oddball
14	3781	longer	True_Short	550	False_Short	378.1	True	_Short	Oddball
14	160	shorter	True_Long	425	True_Short	16	True	_Long	Oddball
14	7518	shorter	True_Short	375	True_Long	751.8	True	_Short	Oddball
14	6153	longer	True_Short	450	True_Short	615.3	True	_Short	Oddball
14	2077	longer	True_Short	558.3	True_Short	207.7	True	_Short	Oddball
14	1894	longer	True_Short	633.3	True_Short	189.4	True	_Short	Oddball
14	8674	shorter	True_Long	616.7	True_Short	867.4	True	_Long	Oddball
14	3534	shorter	True_Short	366.6	True_Long	353.4	True	_Short	Oddball
14	1065	longer	False_Short	608.3	True_Short	106.5	False	_Short	Oddball
14	1261	longer	True_Long	558.3	False_Short	126.1	True	_Long	Oddball
14	2191	longer	True_Long	500	True_Long	219.1	True	_Long	Oddball
14	2434	longer	True_Long	525	True_Long	243.4	True	_Long	Oddball
14	5201	shorter	False_Short	425	True_Long	520.1	False	_Short	Oddball
14	3881	shorter	True_Long	333.3	False_Short	388.1	True	_Long	Oddball
14	8507	shorter	False_Long	400	True_Long	850.7	False	_Long	Oddball
14	8440	longer	False_Short	500	False_Long	844	False	_Short	Oddball
14	2138	longer	False_Short	500	False_Short	213.8	False	_Short	Oddball
14	1954	longer	False_Long	400	False_Short	195.4	False	_Long	Oddball
14	1357	longer	True_Long	450	False_Long	135.7	True	_Long	Oddball
14	1686	shorter	True_Long	391.6	True_Long	168.6	True	_Long	Oddball
14	7174	longer	True_Short	500	True_Long	717.4	True	_Short	Oddball
14	5593	shorter	False_Long	383.3	True_Short	559.3	False	_Long	Oddball
14	7154	shorter	True_Short	525	False_Long	715.4	True	_Short	Oddball
14	4761	shorter	True_Short	450	True_Short	476.1	True	_Short	Oddball
14	3841	shorter	False_Long	375	True_Short	384.1	False	_Long	Oddball
14	4002	shorter	True_Short	400	False_Long	400.2	True	_Short	Oddball
14	394	longer	True_Long	566.6	True_Short	39.4	True	_Long	Oddball
14	2619	longer	True_Short	591.6	True_Long	261.9	True	_Short	Oddball
14	2897	longer	True_Short	633.3	True_Short	289.7	True	_Short	Oddball
14	3392	longer	True_Long	625	True_Short	339.2	True	_Long	Oddball
14	5558	shorter	False_Long	400	True_Long	555.8	False	_Long	Oddball
14	2601	shorter	True_Long	391.6	False_Long	260.1	True	_Long	Oddball
14	3777	longer	True_Long	550	True_Long	377.7	True	_Long	Oddball
14	3545	shorter	True_Short	458.3	True_Long	354.5	True	_Short	Oddball
14	759	longer	True_Short	600	True_Short	75.9	True	_Short	Oddball
14	747	longer	True_Short	541.6	True_Short	74.7	True	_Short	Oddball
14	2463	longer	True_Long	583.3	True_Short	246.3	True	_Long	Oddball
14	2191	longer	True_Short	625	True_Long	219.1	True	_Short	Oddball
14	1780	longer	True_Long	558.3	True_Short	178	True	_Long	Oddball
14	1476	longer	True_Long	533.3	True_Long	147.6	True	_Long	Oddball
14	7672	longer	False_Long	516.6	True_Long	767.2	False	_Long	Oddball
14	3586	shorter	True_Short	633.3	False_Long	358.6	True	_Short	Oddball
14	4794	shorter	False_Short	408.3	True_Short	479.4	False	_Short	Oddball
14	3339	shorter	False_Short	350	False_Short	333.9	False	_Short	Oddball
14	1231	longer	False_Long	483.3	False_Short	123.1	False	_Long	Oddball
14	2712	longer	True_Short	566.6	False_Long	271.2	True	_Short	Oddball
14	3642	longer	False_Long	558.3	True_Short	364.2	False	_Long	Oddball
14	8621	longer	True_Long	541.6	False_Long	862.1	True	_Long	Oddball
14	2841	shorter	True_Short	375	True_Long	284.1	True	_Short	Oddball
14	3804	shorter	False_Long	458.3	True_Short	380.4	False	_Long	Oddball
14	6873	shorter	True_Long	500	False_Long	687.3	True	_Long	Oddball
14	3404	shorter	True_Short	375	True_Long	340.4	True	_Short	Oddball
14	5612	longer	False_Short	325	True_Short	561.2	False	_Short	Oddball
14	3391	shorter	True_Long	341.6	False_Short	339.1	True	_Long	Oddball
14	604	longer	True_Long	583.3	True_Long	60.4	True	_Long	Oddball
14	75	longer	True_Short	650	True_Long	7.5	True	_Short	Oddball
14	3485	longer	True_Long	416.6	True_Short	348.5	True	_Long	Oddball
14	5479	longer	True_Short	458.3	True_Long	547.9	True	_Short	Oddball
14	3134	longer	True_Short	508.3	True_Short	313.4	True	_Short	Oddball
14	216	longer	True_Long	533.3	True_Short	21.6	True	_Long	Oddball
14	599	longer	True_Long	575	True_Long	59.9	True	_Long	Oddball
14	3412	longer	True_Long	458.3	True_Long	341.2	True	_Long	Oddball
14	1278	longer	False_Short	541.6	True_Long	127.8	False	_Short	Oddball
14	6635	longer	False_Short	666.7	False_Short	663.5	False	_Short	Oddball
14	258	longer	False_Long	633.3	False_Short	25.8	False	_Long	Oddball
14	3081	shorter	True_Long	433.3	False_Short	308.1	True	_Long	Oddball
14	6142	shorter	True_Short	625	True_Long	614.2	True	_Short	Oddball
14	2313	longer	True_Short	350	True_Short	231.3	True	_Short	Oddball
14	4519	shorter	True_Long	408.3	True_Short	451.9	True	_Long	Oddball
14	2770	shorter	True_Short	508.3	True_Long	277	True	_Short	Oddball
14	3059	shorter	True_Long	550	True_Short	305.9	True	_Long	Oddball
14	1887	shorter	True_Short	416.6	True_Long	188.7	True	_Short	Oddball
14	2445	shorter	True_Short	408.3	True_Short	244.5	True	_Short	Oddball
14	728	longer	True_Long	600	True_Short	72.8	True	_Long	Oddball
14	3750	shorter	False_Long	525	True_Long	375	False	_Long	Oddball
14	561	longer	True_Short	583.3	False_Long	56.1	True	_Short	Oddball
14	2053	longer	True_Short	608.3	True_Short	205.3	True	_Short	Oddball
14	2139	shorter	True_Long	333.3	True_Short	213.9	True	_Long	Oddball
14	2020	longer	True_Short	675	True_Long	202	True	_Short	Oddball
14	1332	longer	False_Long	666.7	True_Short	133.2	False	_Long	Oddball
14	3729	shorter	True_Long	425	False_Long	372.9	True	_Long	Oddball
14	4011	longer	True_Long	675	True_Long	401.1	True	_Long	Oddball
14	2865	shorter	True_Short	650	True_Long	286.5	True	_Short	Oddball
14	1998	shorter	False_Long	433.3	True_Short	199.8	False	_Long	Oddball
14	129	longer	True_Short	658.3	False_Long	12.9	True	_Short	Oddball
14	828	longer	False_Long	591.6	True_Short	82.8	False	_Long	Oddball
14	10116	shorter	False_Short	483.3	False_Long	1011.6	False	_Short	Oddball
14	3730	shorter	True_Short	341.6	False_Short	373	True	_Short	Oddball
14	2830	shorter	False_Long	433.3	True_Short	283	False	_Long	Oddball
14	5405	longer	True_Long	625	False_Long	540.5	True	_Long	Oddball
14	7550	longer	False_Short	483.3	True_Long	755	False	_Short	Oddball
14	5385	longer	True_Long	608.3	False_Short	538.5	True	_Long	Oddball
14	2887	shorter	True_Long	458.3	True_Long	288.7	True	_Long	Oddball
14	1102	longer	True_Short	566.6	True_Long	110.2	True	_Short	Oddball
14	4815	shorter	True_Long	558.3	True_Short	481.5	True	_Long	Oddball
14	882	longer	False_Short	541.6	True_Long	88.2	False	_Short	Oddball
14	3755	shorter	True_Long	483.3	False_Short	375.5	True	_Long	Oddball
14	11093	longer	False_Short	466.6	True_Long	1109.3	False	_Short	Oddball
14	1948	shorter	True_Short	433.3	True_Long	194.8	True	_Short	Oddball
14	3336	shorter	False_Short	525	True_Short	333.6	False	_Short	Oddball
14	2352	longer	True_Long	475	False_Short	235.2	True	_Long	Oddball
14	2058	shorter	True_Long	450	True_Long	205.8	True	_Long	Oddball
14	933	shorter	True_Short	400	True_Long	93.3	True	_Short	Oddball
14	3059	shorter	True_Long	341.6	True_Short	305.9	True	_Long	Oddball
14	1180	longer	False_Short	583.3	True_Long	118	False	_Short	Oddball
14	1295	longer	True_Short	583.3	False_Short	129.5	True	_Short	Oddball
14	2391	longer	True_Long	483.3	True_Short	239.1	True	_Long	Oddball
14	2379	shorter	True_Short	383.3	True_Long	237.9	True	_Short	Oddball
14	5942	shorter	True_Long	408.3	True_Short	594.2	True	_Long	Oddball
14	5439	shorter	False_Short	650	True_Long	543.9	False	_Short	Oddball
14	2708	longer	False_Long	433.3	False_Short	270.8	False	_Long	Oddball
14	3950	shorter	True_Long	575	False_Long	395	True	_Long	Oddball
14	3610	shorter	True_Long	408.3	True_Long	361	True	_Long	Oddball
14	10747	longer	True_Short	583.3	True_Long	1074.7	True	_Short	Oddball
14	429	longer	False_Long	666.7	True_Short	42.9	False	_Long	Oddball
14	3449	shorter	False_Long	358.3	False_Long	344.9	False	_Long	Oddball
14	2265	shorter	True_Long	366.6	False_Long	226.5	True	_Long	Oddball
14	2211	longer	False_Long	658.3	True_Long	221.1	False	_Long	Oddball
14	6122	shorter	True_Short	591.7	False_Long	612.2	True	_Short	Oddball
14	3954	longer	True_Long	558.3	True_Short	395.4	True	_Long	Oddball
14	755	longer	True_Short	591.7	True_Long	75.5	True	_Short	Oddball
14	6058	shorter	True_Long	416.6	True_Short	605.8	True	_Long	Oddball
14	10222	longer	True_Short	375	True_Long	1022.2	True	_Short	Oddball
14	456	longer	True_Short	583.3	True_Short	45.6	True	_Short	Oddball
14	867	longer	True_Short	516.6	True_Short	86.7	True	_Short	Oddball
14	1355	longer	False_Short	483.3	True_Short	135.5	False	_Short	Oddball
14	1393	longer	True_Short	358.3	False_Short	139.3	True	_Short	Oddball
14	326	longer	False_Long	483.3	True_Short	32.6	False	_Long	Oddball
14	546	longer	True_Long	566.7	False_Long	54.6	True	_Long	Oddball
14	2077	longer	False_Short	508.3	True_Long	207.7	False	_Short	Oddball
14	2852	shorter	True_Short	441.6	False_Short	285.2	True	_Short	Oddball
14	1446	longer	False_Short	666.7	True_Short	144.6	False	_Short	Oddball
14	831	longer	True_Short	583.3	False_Short	83.1	True	_Short	Oddball
14	2629	shorter	True_Short	408.3	True_Short	262.9	True	_Short	Oddball
14	558	longer	True_Long	666.7	True_Short	55.8	True	_Long	Oddball
14	1740	longer	True_Short	583.3	True_Long	174	True	_Short	Oddball
14	586	longer	True_Long	658.3	True_Short	58.6	True	_Long	Oddball
14	5967	longer	True_Short	675	True_Long	596.7	True	_Short	Oddball
14	1316	longer	False_Long	583.3	True_Short	131.6	False	_Long	Oddball
14	2192	shorter	True_Long	433.3	False_Long	219.2	True	_Long	Oddball
14	3201	longer	False_Long	608.3	True_Long	320.1	False	_Long	Oddball
14	285	shorter	False_Short	558.3	False_Long	28.5	False	_Short	Oddball
14	4388	shorter	True_Long	466.6	False_Short	438.8	True	_Long	Oddball
14	2143	longer	True_Short	566.6	True_Long	214.3	True	_Short	Oddball
14	6978	longer	False_Long	650	True_Short	697.8	False	_Long	Oddball
14	3796	longer	True_Short	650	False_Long	379.6	True	_Short	Oddball
14	1492	shorter	False_Long	333.3	True_Short	149.2	False	_Long	Oddball
14	8670	longer	False_Short	491.6	False_Long	867	False	_Short	Oddball
14	1515	shorter	True_Long	366.6	False_Short	151.5	True	_Long	Oddball
14	855	shorter	True_Long	450	True_Long	85.5	True	_Long	Oddball
14	1274	longer	True_Long	616.7	True_Long	127.4	True	_Long	Oddball
14	540	longer	True_Long	658.3	True_Long	54	True	_Long	Oddball
14	7289	longer	False_Long	425	True_Long	728.9	False	_Long	Oddball
14	1060	longer	True_Short	633.3	False_Long	106	True	_Short	Oddball
14	438	longer	True_Short	641.7	True_Short	43.8	True	_Short	Oddball
14	2266	shorter	True_Short	375	True_Short	226.6	True	_Short	Oddball
14	1416	shorter	True_Long	450	True_Short	141.6	True	_Long	Oddball
14	1724	shorter	False_Short	475	True_Long	172.4	False	_Short	Oddball
14	2497	shorter	True_Long	450	False_Short	249.7	True	_Long	Oddball
14	2438	shorter	True_Short	483.3	True_Long	243.8	True	_Short	Oddball
14	687	shorter	True_Long	483.3	True_Short	68.7	True	_Long	Oddball
14	5149	shorter	False_Short	366.6	True_Long	514.9	False	_Short	Oddball
14	1028	shorter	True_Long	341.6	False_Short	102.8	True	_Long	Oddball
14	5669	shorter	True_Short	483.3	True_Long	566.9	True	_Short	Oddball
14	9544	longer	True_Short	400	True_Long	954.4	True	_Short	Oddball
14	4179	shorter	True_Long	408.3	True_Short	417.9	True	_Long	Oddball
14	4627	shorter	False_Short	450	True_Long	462.7	False	_Short	Oddball
14	4901	shorter	True_Short	441.6	False_Short	490.1	True	_Short	Oddball
14	267	shorter	True_Long	450	True_Short	26.7	True	_Long	Oddball
14	6605	shorter	True_Short	516.6	True_Long	660.5	True	_Short	Oddball
14	3853	shorter	True_Short	408.3	True_Short	385.3	True	_Short	Oddball
14	1277	shorter	False_Short	641.7	True_Short	127.7	False	_Short	Oddball
14	1305	shorter	True_Short	591.7	False_Short	130.5	True	_Short	Oddball
14	7144	shorter	True_Long	625	True_Short	714.4	True	_Long	Oddball
14	1743	shorter	True_Long	341.6	True_Long	174.3	True	_Long	Oddball
14	3329	longer	False_Long	608.3	True_Long	332.9	False	_Long	Oddball
14	2867	longer	False_Short	608.3	False_Long	286.7	False	_Short	Oddball
14	2062	longer	True_Long	675	False_Short	206.2	True	_Long	Oddball
14	4780	shorter	False_Short	391.6	True_Long	478	False	_Short	Oddball
14	3138	shorter	True_Short	416.6	False_Short	313.8	True	_Short	Oddball
14	1897	longer	True_Long	541.6	True_Short	189.7	True	_Long	Oddball
14	2759	shorter	True_Short	450	True_Long	275.9	True	_Short	Oddball
14	4377	shorter	True_Short	466.6	True_Short	437.7	True	_Short	Oddball
14	2541	shorter	True_Short	341.6	True_Short	254.1	True	_Short	Oddball
14	4257	longer	True_Long	608.3	True_Short	425.7	True	_Long	Oddball
14	6159	shorter	False_Long	566.6	True_Long	615.9	False	_Long	Oddball
14	8785	longer	True_Long	366.6	False_Long	878.5	True	_Long	Oddball
14	4447	shorter	False_Long	516.6	True_Long	444.7	False	_Long	Oddball
14	3296	shorter	True_Long	383.3	False_Long	329.6	True	_Long	Oddball
14	5567	shorter	True_Short	583.3	True_Long	556.7	True	_Short	Oddball
14	2838	shorter	False_Short	458.3	True_Short	283.8	False	_Short	Oddball
14	1394	longer	True_Long	475	False_Short	139.4	True	_Long	Oddball
14	1977	shorter	True_Long	358.3	True_Long	197.7	True	_Long	Oddball
14	5323	longer	False_Long	591.6	True_Long	532.3	False	_Long	Oddball
14	3909	shorter	False_Long	350	False_Long	390.9	False	_Long	Oddball
14	2010	longer	True_Short	541.6	False_Long	201	True	_Short	Oddball
14	1104	longer	True_Short	650	True_Short	110.4	True	_Short	Oddball
14	238	longer	True_Short	550	True_Short	23.8	True	_Short	Oddball
14	36	longer	True_Short	666.7	True_Short	3.6	True	_Short	Oddball
14	2262	shorter	True_Long	383.3	True_Short	226.2	True	_Long	Oddball
14	6368	longer	False_Long	658.3	True_Long	636.8	False	_Long	Oddball
14	1602	longer	True_Short	666.7	False_Long	160.2	True	_Short	Oddball
14	3941	shorter	True_Long	541.6	True_Short	394.1	True	_Long	Oddball
14	2810	longer	True_Long	583.3	True_Long	281	True	_Long	Oddball
14	5250	longer	True_Long	575	True_Long	525	True	_Long	Oddball
14	4470	longer	True_Short	608.3	True_Long	447	True	_Short	Oddball
14	4438	longer	False_Short	625	True_Short	443.8	False	_Short	Oddball
14	1180	longer	True_Long	650	False_Short	118	True	_Long	Oddball
14	1176	longer	True_Long	641.7	True_Long	117.6	True	_Long	Oddball
14	2728	shorter	False_Short	391.6	True_Long	272.8	False	_Short	Oddball
14	2219	longer	True_Short	591.7	False_Short	221.9	True	_Short	Oddball
14	7987	shorter	False_Short	350	True_Short	798.7	False	_Short	Oddball
14	2861	shorter	True_Short	400	False_Short	286.1	True	_Short	Oddball
14	7472	shorter	True_Short	375	True_Short	747.2	True	_Short	Oddball
14	2318	shorter	False_Long	491.6	True_Short	231.8	False	_Long	Oddball
14	4606	longer	True_Long	600	False_Long	460.6	True	_Long	Oddball
14	2516	shorter	True_Long	516.6	True_Long	251.6	True	_Long	Oddball
14	1439	shorter	True_Long	391.6	True_Long	143.9	True	_Long	Oddball
14	627	shorter	True_Short	475	True_Long	62.7	True	_Short	Oddball
14	2055	longer	True_Short	558.3	True_Short	205.5	True	_Short	Oddball
14	1389	shorter	True_Short	450	True_Short	138.9	True	_Short	Oddball
14	3432	shorter	False_Long	508.3	True_Short	343.2	False	_Long	Oddball
14	3658	shorter	False_Long	441.6	False_Long	365.8	False	_Long	Oddball
14	1336	longer	False_Short	625	False_Long	133.6	False	_Short	Oddball
14	1508	longer	False_Long	583.3	False_Short	150.8	False	_Long	Oddball
14	3819	longer	False_Short	658.3	False_Long	381.9	False	_Short	Oddball
14	529	longer	True_Long	591.6	False_Short	52.9	True	_Long	Oddball
14	1075	longer	True_Long	533.3	True_Long	107.5	True	_Long	Oddball
14	5384	longer	True_Long	666.7	True_Long	538.4	True	_Long	Oddball
14	4822	shorter	True_Short	458.3	True_Long	482.2	True	_Short	Oddball
14	7647	longer	True_Short	350	False_Short	764.7	True	_Short	Oddball
14	904	longer	True_Short	483.3	True_Short	90.4	True	_Short	Oddball
14	1670	shorter	True_Long	341.6	True_Short	167	True	_Long	Oddball
14	4805	shorter	True_Short	383.3	True_Long	480.5	True	_Short	Oddball
14	7980	shorter	False_Short	375	True_Short	798	False	_Short	Oddball
14	1155	longer	True_Long	616.7	False_Short	115.5	True	_Long	Oddball
14	1431	shorter	True_Long	341.6	True_Long	143.1	True	_Long	Oddball
14	5670	shorter	True_Long	608.3	True_Long	567	True	_Long	Oddball
14	8251	shorter	False_Short	566.6	True_Long	825.1	False	_Short	Oddball
14	3449	shorter	False_Short	366.6	False_Short	344.9	False	_Short	Oddball
14	1041	longer	True_Long	625	False_Short	104.1	True	_Long	Oddball
14	2120	longer	True_Long	550	True_Long	212	True	_Long	Oddball
14	3028	shorter	True_Short	508.3	True_Long	302.8	True	_Short	Oddball
14	5194	longer	True_Long	633.3	True_Short	519.4	True	_Long	Oddball
14	7002	shorter	True_Short	350	True_Long	700.2	True	_Short	Oddball
14	937	longer	False_Long	608.3	True_Short	93.7	False	_Long	Oddball
14	1780	longer	False_Long	550	False_Long	178	False	_Long	Oddball
14	971	shorter	True_Short	433.3	False_Long	97.1	True	_Short	Oddball
14	2953	shorter	True_Short	341.6	True_Short	295.3	True	_Short	Oddball
14	1525	longer	True_Long	625	True_Short	152.5	True	_Long	Oddball
14	1632	longer	True_Long	533.3	True_Long	163.2	True	_Long	Oddball
14	327	longer	False_Long	650	True_Long	32.7	False	_Long	Oddball
14	590	longer	False_Long	458.3	False_Long	59	False	_Long	Oddball
14	293	longer	False_Long	633.3	False_Long	29.3	False	_Long	Oddball
14	3701	shorter	True_Short	441.6	False_Long	370.1	True	_Short	Oddball
14	4802	shorter	True_Short	466.6	True_Short	480.2	True	_Short	Oddball
14	207	longer	True_Short	600	True_Short	20.7	True	_Short	Oddball
14	1551	longer	True_Short	608.3	True_Short	155.1	True	_Short	Oddball
14	2429	shorter	True_Short	441.6	True_Short	242.9	True	_Short	Oddball
14	111	longer	True_Long	616.7	True_Short	11.1	True	_Long	Oddball
14	4727	longer	True_Long	600	True_Long	472.7	True	_Long	Oddball
14	5348	shorter	False_Short	366.6	True_Long	534.8	False	_Short	Oddball
14	5829	longer	False_Short	583.3	True_Short	582.9	False	_Short	Oddball
14	2586	shorter	False_Short	508.3	False_Short	258.6	False	_Short	Oddball
14	3276	shorter	False_Long	566.7	False_Short	327.6	False	_Long	Oddball
14	1467	longer	True_Short	583.3	False_Long	146.7	True	_Short	Oddball
14	538	longer	True_Short	566.6	True_Short	53.8	True	_Short	Oddball
14	2117	longer	True_Long	550	True_Short	211.7	True	_Long	Oddball
14	1782	shorter	False_Short	416.6	True_Long	178.2	False	_Short	Oddball
14	4010	longer	True_Short	641.7	False_Short	401	True	_Short	Oddball
14	6604	longer	True_Short	500	True_Short	660.4	True	_Short	Oddball
14	2300	longer	True_Long	450	True_Short	230	True	_Long	Oddball
14	5811	shorter	True_Short	383.3	True_Long	581.1	True	_Short	Oddball
14	5035	longer	True_Short	550	True_Short	503.5	True	_Short	Oddball
14	3903	shorter	False_Short	516.6	True_Short	390.3	False	_Short	Oddball
14	8140	longer	False_Short	600	False_Short	814	False	_Short	Oddball
14	3226	shorter	True_Long	425	False_Short	322.6	True	_Long	Oddball
14	3179	shorter	True_Long	350	True_Long	317.9	True	_Long	Oddball
14	4090	shorter	True_Short	591.7	True_Long	409	True	_Short	Oddball
14	792	longer	False_Long	583.3	True_Short	79.2	False	_Long	Oddball
14	4638	longer	True_Long	458.3	False_Long	463.8	True	_Long	Oddball
14	1734	longer	False_Long	550	True_Long	173.4	False	_Long	Oddball
14	1932	shorter	True_Short	325	False_Long	193.2	True	_Short	Oddball
14	3008	shorter	True_Long	466.6	True_Short	300.8	True	_Long	Oddball
14	3391	shorter	True_Long	491.6	True_Long	339.1	True	_Long	Oddball
14	2530	shorter	True_Long	566.6	True_Long	253	True	_Long	Oddball
14	383	longer	True_Long	666.7	True_Long	38.3	True	_Long	Oddball
14	3817	shorter	True_Short	566.6	True_Long	381.7	True	_Short	Oddball
14	2853	shorter	True_Long	383.3	True_Short	285.3	True	_Long	Oddball
14	2732	shorter	True_Long	566.6	True_Long	273.2	True	_Long	Oddball
14	2220	shorter	True_Short	400	True_Long	222	True	_Short	Oddball
14	3196	shorter	False_Long	491.6	True_Short	319.6	False	_Long	Oddball
14	39281	shorter	False_Long	616.7	False_Long	3928.1	False	_Long	Oddball
14	5259	shorter	True_Short	508.3	False_Long	525.9	True	_Short	Oddball
15	13302	longer	False_Long	591.7	True_Long	1330.2	False	_Long	Oddball
15	6962	shorter	True_Short	508.3	False_Long	696.2	True	_Short	Oddball
15	27772	longer	False_Short	666.7	True_Short	2777.2	False	_Short	Oddball
15	9480	shorter	True_Short	533.3	False_Short	948	True	_Short	Oddball
15	26067	shorter	True_Short	375	True_Short	2606.7	True	_Short	Oddball
15	12955	shorter	True_Short	358.3	True_Short	1295.5	True	_Short	Oddball
15	15037	shorter	True_Long	450	True_Short	1503.7	True	_Long	Oddball
15	5991	longer	False_Long	658.3	True_Long	599.1	False	_Long	Oddball
15	7168	shorter	True_Short	441.6	False_Long	716.8	True	_Short	Oddball
15	5187	shorter	False_Long	383.3	True_Short	518.7	False	_Long	Oddball
15	11084	shorter	False_Short	325	False_Long	1108.4	False	_Short	Oddball
15	13451	shorter	False_Short	558.3	False_Short	1345.1	False	_Short	Oddball
15	12010	shorter	True_Short	641.7	False_Short	1201	True	_Short	Oddball
15	7202	longer	True_Long	566.7	True_Short	720.2	True	_Long	Oddball
15	8775	shorter	True_Short	533.3	True_Long	877.5	True	_Short	Oddball
15	5436	longer	True_Short	658.3	True_Short	543.6	True	_Short	Oddball
15	6814	longer	True_Long	558.3	True_Short	681.4	True	_Long	Oddball
15	15046	shorter	True_Long	491.7	True_Long	1504.6	True	_Long	Oddball
15	1930	longer	True_Long	633.3	True_Long	193	True	_Long	Oddball
15	10626	shorter	False_Long	416.6	True_Long	1062.6	False	_Long	Oddball
15	3529	longer	True_Short	466.6	False_Long	352.9	True	_Short	Oddball
15	1362	longer	True_Long	616.7	True_Short	136.2	True	_Long	Oddball
15	3834	longer	True_Long	633.3	True_Long	383.4	True	_Long	Oddball
15	6471	longer	True_Short	608.3	True_Long	647.1	True	_Short	Oddball
15	3556	longer	True_Long	591.7	True_Short	355.6	True	_Long	Oddball
15	11409	shorter	True_Long	366.6	True_Long	1140.9	True	_Long	Oddball
15	11104	shorter	False_Long	366.6	True_Long	1110.4	False	_Long	Oddball
15	4274	shorter	True_Short	550	False_Long	427.4	True	_Short	Oddball
15	6438	shorter	False_Short	550	True_Short	643.8	False	_Short	Oddball
15	1850	shorter	True_Long	375	False_Short	185	True	_Long	Oddball
15	6964	shorter	True_Short	416.6	True_Long	696.4	True	_Short	Oddball
15	7690	shorter	True_Short	408.3	True_Short	769	True	_Short	Oddball
15	2660	longer	True_Short	591.7	True_Short	266	True	_Short	Oddball
15	3509	shorter	False_Long	358.3	True_Short	350.9	False	_Long	Oddball
15	6607	shorter	False_Short	491.7	False_Long	660.7	False	_Short	Oddball
15	4109	shorter	False_Long	333.3	False_Short	410.9	False	_Long	Oddball
15	8781	shorter	True_Long	458.3	False_Long	878.1	True	_Long	Oddball
15	5691	shorter	True_Short	433.3	True_Long	569.1	True	_Short	Oddball
15	4512	longer	True_Short	566.7	True_Short	451.2	True	_Short	Oddball
15	5343	shorter	False_Short	458.3	True_Short	534.3	False	_Short	Oddball
15	4405	shorter	False_Long	358.3	False_Short	440.5	False	_Long	Oddball
15	2541	longer	True_Long	566.7	False_Long	254.1	True	_Long	Oddball
15	9420	longer	True_Long	500	True_Long	942	True	_Long	Oddball
15	1510	longer	True_Short	616.7	True_Long	151	True	_Short	Oddball
15	6156	shorter	True_Long	383.3	True_Short	615.6	True	_Long	Oddball
15	8711	shorter	True_Long	541.7	True_Long	871.1	True	_Long	Oddball
15	10153	longer	True_Long	475	True_Long	1015.3	True	_Long	Oddball
15	7174	shorter	True_Long	375	True_Long	717.4	True	_Long	Oddball
15	12826	shorter	True_Long	500	True_Long	1282.6	True	_Long	Oddball
15	22869	shorter	False_Short	591.7	True_Long	2286.9	False	_Short	Oddball
15	4989	shorter	False_Long	358.3	False_Short	498.9	False	_Long	Oddball
15	6453	longer	False_Short	625	False_Long	645.3	False	_Short	Oddball
15	6647	longer	True_Short	458.3	False_Short	664.7	True	_Short	Oddball
15	8211	longer	True_Short	616.7	True_Short	821.1	True	_Short	Oddball
15	9344	longer	True_Short	533.3	True_Short	934.4	True	_Short	Oddball
15	7183	longer	True_Long	616.7	True_Short	718.3	True	_Long	Oddball
15	1424	longer	True_Long	625	True_Long	142.4	True	_Long	Oddball
15	7479	longer	True_Short	508.3	True_Long	747.9	True	_Short	Oddball
15	5873	longer	True_Long	616.7	True_Short	587.3	True	_Long	Oddball
15	8248	longer	False_Short	466.7	True_Long	824.8	False	_Short	Oddball
15	2478	longer	True_Short	583.3	False_Short	247.8	True	_Short	Oddball
15	3254	longer	True_Long	566.7	True_Short	325.4	True	_Long	Oddball
15	183	longer	False_Long	500	True_Long	18.3	False	_Long	Oddball
15	597	longer	True_Short	333.3	False_Long	59.7	True	_Short	Oddball
15	7605	shorter	True_Short	491.7	True_Long	760.5	True	_Short	Oddball
15	6376	shorter	False_Short	500	True_Short	637.6	False	_Short	Oddball
15	6384	shorter	True_Long	491.7	False_Short	638.4	True	_Long	Oddball
15	6943	longer	True_Long	516.7	True_Long	694.3	True	_Long	Oddball
15	4677	shorter	True_Short	558.3	True_Long	467.7	True	_Short	Oddball
15	3827	shorter	True_Short	441.6	True_Short	382.7	True	_Short	Oddball
15	4842	shorter	True_Short	466.6	True_Short	484.2	True	_Short	Oddball
15	5887	longer	True_Long	450	True_Short	588.7	True	_Long	Oddball
15	3472	longer	True_Long	600	True_Long	347.2	True	_Long	Oddball
15	7240	longer	True_Short	425	True_Long	724	True	_Short	Oddball
15	3509	longer	True_Long	550	True_Short	350.9	True	_Long	Oddball
15	7600	longer	True_Short	408.3	True_Long	760	True	_Short	Oddball
15	5735	shorter	True_Long	450	True_Short	573.5	True	_Long	Oddball
15	12235	longer	True_Short	566.7	True_Long	1223.5	True	_Short	Oddball
15	4195	longer	True_Short	466.7	True_Short	419.5	True	_Short	Oddball
15	2474	longer	True_Long	633.3	True_Short	247.4	True	_Long	Oddball
15	9665	shorter	True_Short	366.6	True_Long	966.5	True	_Short	Oddball
15	7343	longer	True_Long	383.3	True_Short	734.3	True	_Long	Oddball
15	1965	longer	False_Long	658.3	True_Long	196.5	False	_Long	Oddball
15	2491	shorter	False_Long	641.7	False_Long	249.1	False	_Long	Oddball
15	7395	longer	False_Short	475	False_Long	739.5	False	_Short	Oddball
15	5629	longer	True_Short	466.6	False_Short	562.9	True	_Short	Oddball
15	3716	shorter	False_Short	408.3	True_Short	371.6	False	_Short	Oddball
15	5811	shorter	False_Short	383.3	False_Short	581.1	False	_Short	Oddball
15	14519	longer	False_Long	400	False_Short	1451.9	False	_Long	Oddball
15	12179	shorter	False_Short	583.3	False_Long	1217.9	False	_Short	Oddball
15	4612	shorter	True_Short	483.3	False_Short	461.2	True	_Short	Oddball
15	5197	shorter	True_Long	625	True_Short	519.7	True	_Long	Oddball
15	8726	shorter	False_Long	408.3	True_Long	872.6	False	_Long	Oddball
15	7204	shorter	False_Long	483.3	False_Long	720.4	False	_Long	Oddball
15	4736	shorter	True_Long	400	False_Long	473.6	True	_Long	Oddball
15	1235	longer	True_Long	625	True_Long	123.5	True	_Long	Oddball
15	5483	longer	True_Short	441.6	True_Long	548.3	True	_Short	Oddball
15	4153	shorter	True_Short	391.6	True_Long	415.3	True	_Short	Oddball
15	3899	longer	True_Long	566.7	True_Short	389.9	True	_Long	Oddball
15	1559	longer	True_Short	650	True_Long	155.9	True	_Short	Oddball
15	2384	longer	False_Short	575	True_Short	238.4	False	_Short	Oddball
15	7251	longer	True_Short	383.3	False_Short	725.1	True	_Short	Oddball
15	4673	longer	True_Long	466.6	True_Short	467.3	True	_Long	Oddball
15	2529	longer	False_Long	641.7	True_Long	252.9	False	_Long	Oddball
15	3640	longer	True_Short	358.3	False_Long	364	True	_Short	Oddball
15	3727	longer	False_Short	408.3	True_Short	372.7	False	_Short	Oddball
15	1886	longer	True_Long	583.3	False_Short	188.6	True	_Long	Oddball
15	4694	longer	True_Short	383.3	True_Long	469.4	True	_Short	Oddball
15	4102	longer	True_Short	400	True_Short	410.2	True	_Short	Oddball
15	3149	longer	True_Short	558.3	True_Short	314.9	True	_Short	Oddball
15	13425	longer	True_Long	550	True_Short	1342.5	True	_Long	Oddball
15	956	longer	True_Long	575	True_Long	95.6	True	_Long	Oddball
15	7155	shorter	True_Long	358.3	True_Long	715.5	True	_Long	Oddball
15	3386	longer	True_Short	491.6	True_Long	338.6	True	_Short	Oddball
15	1748	longer	True_Long	508.3	True_Short	174.8	True	_Long	Oddball
15	2220	longer	False_Long	591.7	True_Long	222	False	_Long	Oddball
15	1377	longer	False_Short	675	False_Long	137.7	False	_Short	Oddball
15	84	longer	True_Long	650	False_Short	8.4	True	_Long	Oddball
15	2126	longer	True_Long	433.3	True_Long	212.6	True	_Long	Oddball
15	2297	longer	False_Short	550	True_Long	229.7	False	_Short	Oddball
15	912	longer	False_Short	625	False_Short	91.2	False	_Short	Oddball
15	3389	shorter	True_Short	500	False_Short	338.9	True	_Short	Oddball
15	5498	longer	False_Long	541.7	True_Short	549.8	False	_Long	Oddball
15	3226	longer	True_Short	516.7	False_Long	322.6	True	_Short	Oddball
15	2636	longer	True_Short	541.7	True_Short	263.6	True	_Short	Oddball
15	3562	longer	False_Long	375	True_Short	356.2	False	_Long	Oddball
15	7657	shorter	True_Short	400	False_Long	765.7	True	_Short	Oddball
15	3565	longer	True_Long	408.3	True_Short	356.5	True	_Long	Oddball
15	6624	longer	False_Long	350	True_Long	662.4	False	_Long	Oddball
15	7376	longer	True_Long	408.3	False_Long	737.6	True	_Long	Oddball
15	7609	shorter	True_Short	341.6	True_Long	760.9	True	_Short	Oddball
15	2624	shorter	False_Long	450	True_Short	262.4	False	_Long	Oddball
15	2365	longer	True_Short	575	False_Long	236.5	True	_Short	Oddball
15	3631	longer	True_Long	550	True_Short	363.1	True	_Long	Oddball
15	3563	longer	True_Long	558.3	True_Long	356.3	True	_Long	Oddball
15	7984	shorter	False_Short	383.3	True_Long	798.4	False	_Short	Oddball
15	1383	longer	False_Long	658.3	False_Short	138.3	False	_Long	Oddball
15	3278	longer	False_Long	475	False_Long	327.8	False	_Long	Oddball
15	5683	shorter	True_Short	450	False_Long	568.3	True	_Short	Oddball
15	5282	shorter	True_Long	383.3	True_Short	528.2	True	_Long	Oddball
15	3860	shorter	True_Long	375	True_Long	386	True	_Long	Oddball
15	18048	shorter	True_Short	533.3	True_Long	1804.8	True	_Short	Oddball
15	3374	longer	True_Short	466.6	True_Short	337.4	True	_Short	Oddball
15	1865	longer	False_Short	625	True_Short	186.5	False	_Short	Oddball
15	7146	longer	True_Short	600	False_Short	714.6	True	_Short	Oddball
15	17750	longer	True_Long	525	True_Short	1775	True	_Long	Oddball
15	4627	shorter	False_Short	416.6	True_Long	462.7	False	_Short	Oddball
15	3961	shorter	False_Short	391.6	False_Short	396.1	False	_Short	Oddball
15	6406	longer	True_Long	641.7	False_Short	640.6	True	_Long	Oddball
15	13093	longer	True_Short	425	True_Long	1309.3	True	_Short	Oddball
15	1856	shorter	True_Short	366.6	True_Short	185.6	True	_Short	Oddball
15	3869	shorter	True_Long	333.3	True_Short	386.9	True	_Long	Oddball
15	6868	longer	True_Long	466.6	True_Long	686.8	True	_Long	Oddball
15	7275	longer	True_Short	483.3	True_Long	727.5	True	_Short	Oddball
15	7959	longer	True_Short	550	True_Short	795.9	True	_Short	Oddball
15	4734	longer	True_Long	616.7	True_Short	473.4	True	_Long	Oddball
15	5083	longer	False_Long	408.3	True_Long	508.3	False	_Long	Oddball
15	3752	longer	False_Long	566.7	False_Long	375.2	False	_Long	Oddball
15	2549	longer	False_Short	616.7	False_Long	254.9	False	_Short	Oddball
15	2335	longer	True_Long	633.3	False_Short	233.5	True	_Long	Oddball
15	6446	longer	True_Short	475	True_Long	644.6	True	_Short	Oddball
15	5366	shorter	True_Short	441.6	True_Short	536.6	True	_Short	Oddball
15	3708	longer	True_Long	558.3	True_Short	370.8	True	_Long	Oddball
15	9122	shorter	True_Short	466.7	True_Short	912.2	True	_Short	Oddball
15	2195	longer	True_Short	591.7	True_Short	219.5	True	_Short	Oddball
15	4564	longer	True_Long	608.3	True_Short	456.4	True	_Long	Oddball
15	5010	shorter	False_Long	583.3	True_Long	501	False	_Long	Oddball
15	2965	longer	False_Long	558.3	False_Long	296.5	False	_Long	Oddball
15	4049	longer	False_Short	583.3	False_Long	404.9	False	_Short	Oddball
15	17773	longer	True_Short	475	False_Short	1777.3	True	_Short	Oddball
15	8324	shorter	True_Long	391.6	True_Short	832.4	True	_Long	Oddball
15	5935	shorter	True_Short	325	True_Long	593.5	True	_Short	Oddball
15	4003	shorter	True_Long	383.3	True_Short	400.3	True	_Long	Oddball
15	4952	longer	True_Long	575	True_Long	495.2	True	_Long	Oddball
15	8168	shorter	True_Long	416.6	True_Long	816.8	True	_Long	Oddball
15	2756	longer	True_Long	658.3	True_Long	275.6	True	_Long	Oddball
15	7085	shorter	True_Long	450	True_Long	708.5	True	_Long	Oddball
15	10407	shorter	True_Long	333.3	True_Long	1040.7	True	_Long	Oddball
15	1705	longer	True_Long	658.3	True_Long	170.5	True	_Long	Oddball
15	3169	longer	True_Short	558.3	True_Long	316.9	True	_Short	Oddball
15	3388	longer	False_Long	483.3	True_Short	338.8	False	_Long	Oddball
15	1963	longer	True_Short	616.7	False_Long	196.3	True	_Short	Oddball
15	6810	longer	False_Short	475	True_Short	681	False	_Short	Oddball
15	9426	shorter	True_Long	333.3	False_Short	942.6	True	_Long	Oddball
15	18486	shorter	False_Short	591.7	True_Long	1848.6	False	_Short	Oddball
15	3502	shorter	True_Short	400	False_Short	350.2	True	_Short	Oddball
15	2711	longer	False_Long	575	True_Short	271.1	False	_Long	Oddball
15	2363	longer	False_Long	550	False_Long	236.3	False	_Long	Oddball
15	4354	shorter	False_Short	375	False_Long	435.4	False	_Short	Oddball
15	3711	longer	True_Short	558.3	False_Short	371.1	True	_Short	Oddball
15	4622	shorter	True_Short	541.7	True_Short	462.2	True	_Short	Oddball
15	3956	shorter	False_Short	391.6	True_Short	395.6	False	_Short	Oddball
15	4522	longer	True_Long	541.7	False_Short	452.2	True	_Long	Oddball
15	8501	longer	True_Long	550	True_Long	850.1	True	_Long	Oddball
15	41727	longer	True_Short	666.7	True_Long	4172.7	True	_Short	Oddball
15	7911	shorter	True_Short	350	True_Short	791.1	True	_Short	Oddball
15	8697	longer	True_Long	583.3	True_Short	869.7	True	_Long	Oddball
15	10118	shorter	False_Short	366.6	True_Long	1011.8	False	_Short	Oddball
15	9779	shorter	True_Long	583.3	False_Short	977.9	True	_Long	Oddball
15	9734	shorter	True_Long	483.3	True_Long	973.4	True	_Long	Oddball
15	509	longer	True_Long	641.7	True_Long	50.9	True	_Long	Oddball
15	2440	longer	True_Short	508.3	True_Long	244	True	_Short	Oddball
15	2896	shorter	True_Long	366.6	True_Short	289.6	True	_Long	Oddball
15	7044	shorter	True_Short	533.3	True_Long	704.4	True	_Short	Oddball
15	4662	shorter	True_Long	400	True_Short	466.2	True	_Long	Oddball
15	1821	longer	True_Long	583.3	True_Long	182.1	True	_Long	Oddball
15	12287	shorter	True_Long	400	True_Long	1228.7	True	_Long	Oddball
15	3418	shorter	True_Long	491.7	True_Long	341.8	True	_Long	Oddball
15	9401	shorter	True_Long	450	True_Long	940.1	True	_Long	Oddball
15	11097	shorter	True_Short	408.3	True_Long	1109.7	True	_Short	Oddball
15	9042	shorter	False_Long	375	True_Short	904.2	False	_Long	Oddball
15	7171	shorter	True_Long	325	False_Long	717.1	True	_Long	Oddball
15	8248	longer	False_Short	575	True_Long	824.8	False	_Short	Oddball
15	4630	longer	False_Long	366.6	False_Short	463	False	_Long	Oddball
15	2925	longer	False_Long	350	False_Long	292.5	False	_Long	Oddball
15	4334	shorter	True_Long	333.3	False_Long	433.4	True	_Long	Oddball
15	5835	longer	True_Short	600	True_Long	583.5	True	_Short	Oddball
15	3649	longer	True_Short	466.7	True_Short	364.9	True	_Short	Oddball
15	7020	shorter	False_Short	400	True_Short	702	False	_Short	Oddball
15	6991	shorter	True_Short	358.3	False_Short	699.1	True	_Short	Oddball
15	3411	longer	True_Short	633.3	True_Short	341.1	True	_Short	Oddball
15	7439	shorter	False_Short	375	True_Short	743.9	False	_Short	Oddball
15	3146	longer	True_Short	575	False_Short	314.6	True	_Short	Oddball
15	4438	shorter	False_Long	408.3	True_Short	443.8	False	_Long	Oddball
15	3766	shorter	True_Short	425	False_Long	376.6	True	_Short	Oddball
15	2350	shorter	True_Short	350	True_Short	235	True	_Short	Oddball
15	9192	longer	False_Long	608.3	True_Short	919.2	False	_Long	Oddball
15	6400	shorter	False_Short	450	False_Long	640	False	_Short	Oddball
15	207	longer	True_Short	633.3	False_Short	20.7	True	_Short	Oddball
15	1088	longer	True_Short	591.7	True_Long	108.8	True	_Short	Oddball
15	8663	shorter	False_Long	500	True_Short	866.3	False	_Long	Oddball
15	4218	shorter	False_Long	591.7	False_Long	421.8	False	_Long	Oddball
15	4122	longer	True_Short	608.3	False_Long	412.2	True	_Short	Oddball
15	11516	longer	True_Short	491.7	True_Short	1151.6	True	_Short	Oddball
15	784	longer	True_Long	625	True_Short	78.4	True	_Long	Oddball
15	6199	longer	False_Short	575	True_Long	619.9	False	_Short	Oddball
15	2984	shorter	True_Long	366.6	False_Short	298.4	True	_Long	Oddball
15	6658	longer	True_Short	508.3	True_Long	665.8	True	_Short	Oddball
15	6200	shorter	False_Long	425	True_Short	620	False	_Long	Oddball
15	11448	longer	True_Short	450	False_Long	1144.8	True	_Short	Oddball
15	6429	shorter	True_Long	350	True_Short	642.9	True	_Long	Oddball
15	303	longer	True_Short	658.3	True_Long	30.3	True	_Short	Oddball
15	5821	longer	True_Short	566.7	True_Short	582.1	True	_Short	Oddball
15	6460	shorter	True_Long	366.6	True_Short	646	True	_Long	Oddball
15	6747	shorter	True_Short	425	True_Long	674.7	True	_Short	Oddball
15	6212	longer	False_Long	608.3	True_Short	621.2	False	_Long	Oddball
15	10494	longer	False_Long	625	False_Long	1049.4	False	_Long	Oddball
15	8054	longer	False_Short	433.3	False_Long	805.4	False	_Short	Oddball
15	3686	longer	True_Long	466.7	False_Short	368.6	True	_Long	Oddball
15	5212	shorter	True_Long	366.6	True_Long	521.2	True	_Long	Oddball
15	8382	shorter	False_Short	341.6	True_Long	838.2	False	_Short	Oddball
15	6327	longer	True_Long	650	False_Short	632.7	True	_Long	Oddball
15	11839	shorter	True_Long	333.3	True_Long	1183.9	True	_Long	Oddball
15	5734	longer	True_Long	625	True_Long	573.4	True	_Long	Oddball
15	48	longer	True_Short	633.3	True_Long	4.8	True	_Short	Oddball
15	344	longer	True_Long	608.3	True_Short	34.4	True	_Long	Oddball
15	1502	longer	False_Short	458.3	True_Long	150.2	False	_Short	Oddball
15	5071	shorter	True_Long	475	False_Short	507.1	True	_Long	Oddball
15	9725	longer	True_Short	641.7	True_Long	972.5	True	_Short	Oddball
15	7668	shorter	True_Short	358.3	True_Short	766.8	True	_Short	Oddball
15	6852	longer	True_Short	658.3	True_Short	685.2	True	_Short	Oddball
15	8699	longer	False_Short	483.3	True_Short	869.9	False	_Short	Oddball
15	9169	longer	True_Short	491.6	True_Long	916.9	True	_Short	Oddball
15	8806	longer	True_Short	575	True_Short	880.6	True	_Short	Oddball
15	7531	shorter	True_Long	458.3	True_Short	753.1	True	_Long	Oddball
15	7195	longer	True_Short	475	True_Long	719.5	True	_Short	Oddball
15	3916	longer	True_Short	466.7	True_Short	391.6	True	_Short	Oddball
15	6660	longer	True_Short	333.3	True_Short	666	True	_Short	Oddball
15	10192	longer	True_Long	450	True_Short	1019.2	True	_Long	Oddball
15	6227	longer	True_Long	441.6	True_Long	622.7	True	_Long	Oddball
15	3712	longer	False_Long	616.7	True_Long	371.2	False	_Long	Oddball
15	8394	longer	False_Long	475	False_Long	839.4	False	_Long	Oddball
15	3236	longer	False_Long	608.3	False_Long	323.6	False	_Long	Oddball
15	10140	shorter	True_Short	400	False_Long	1014	True	_Short	Oddball
15	7307	shorter	False_Short	458.3	True_Short	730.7	False	_Short	Oddball
15	6512	shorter	True_Long	408.3	False_Short	651.2	True	_Long	Oddball
15	3689	shorter	True_Short	591.7	True_Long	368.9	True	_Short	Oddball
15	6713	shorter	False_Short	658.3	True_Short	671.3	False	_Short	Oddball
15	10812	shorter	True_Long	633.3	False_Short	1081.2	True	_Long	Oddball
15	3655	shorter	True_Short	400	True_Long	365.5	True	_Short	Oddball
15	3759	longer	True_Short	558.3	True_Short	375.9	True	_Short	Oddball
15	1979	longer	True_Long	625	True_Short	197.9	True	_Long	Oddball
15	4711	longer	True_Long	525	True_Long	471.1	True	_Long	Oddball
15	6249	longer	True_Long	633.3	True_Long	624.9	True	_Long	Oddball
15	9144	shorter	False_Long	483.3	True_Long	914.4	False	_Long	Oddball
15	3481	longer	True_Short	633.3	False_Long	348.1	True	_Short	Oddball
15	4032	shorter	False_Short	466.7	True_Short	403.2	False	_Short	Oddball
15	10843	shorter	False_Short	358.3	False_Short	1084.3	False	_Short	Oddball
15	868	longer	True_Long	600	False_Short	86.8	True	_Long	Oddball
15	5084	longer	False_Long	525	True_Long	508.4	False	_Long	Oddball
15	3772	shorter	True_Long	516.7	False_Long	377.2	True	_Long	Oddball
15	4304	longer	True_Long	641.7	True_Long	430.4	True	_Long	Oddball
15	9395	shorter	True_Short	433.3	True_Long	939.5	True	_Short	Oddball
15	2646	shorter	False_Short	525	True_Short	264.6	False	_Short	Oddball
15	4427	shorter	True_Short	475	False_Short	442.7	True	_Short	Oddball
15	3501	longer	True_Short	675	True_Short	350.1	True	_Short	Oddball
15	5893	shorter	True_Short	458.3	True_Short	589.3	True	_Short	Oddball
15	223	longer	False_Short	575	True_Short	22.3	False	_Short	Oddball
15	3173	shorter	True_Long	558.3	False_Short	317.3	True	_Long	Oddball
15	9965	longer	True_Long	650	True_Long	996.5	True	_Long	Oddball
15	10140	shorter	True_Long	516.7	True_Long	1014	True	_Long	Oddball
15	6513	shorter	True_Short	441.6	True_Long	651.3	True	_Short	Oddball
15	14442	shorter	True_Long	475	True_Short	1444.2	True	_Long	Oddball
15	4561	longer	True_Short	641.7	True_Long	456.1	True	_Short	Oddball
15	5866	longer	True_Long	633.3	True_Short	586.6	True	_Long	Oddball
15	8063	shorter	True_Short	508.3	True_Long	806.3	True	_Short	Oddball
15	1631	longer	False_Short	666.7	True_Short	163.1	False	_Short	Oddball
15	9822	shorter	True_Short	350	False_Short	982.2	True	_Short	Oddball
15	5885	shorter	True_Short	441.6	True_Short	588.5	True	_Short	Oddball
15	10233	shorter	False_Short	533.3	True_Short	1023.3	False	_Short	Oddball
15	12873	shorter	True_Short	566.7	False_Short	1287.3	True	_Short	Oddball
15	4352	longer	True_Short	600	True_Short	435.2	True	_Short	Oddball
15	3658	shorter	True_Long	450	True_Short	365.8	True	_Long	Oddball
15	8580	shorter	False_Long	475	True_Long	858	False	_Long	Oddball
15	6165	longer	False_Long	525	False_Long	616.5	False	_Long	Oddball
15	13297	shorter	True_Long	500	False_Long	1329.7	True	_Long	Oddball
15	7238	shorter	True_Long	366.6	True_Long	723.8	True	_Long	Oddball
15	5652	longer	True_Short	625	True_Long	565.2	True	_Short	Oddball
15	10801	shorter	True_Long	508.3	True_Short	1080.1	True	_Long	Oddball
15	4159	shorter	False_Long	475	True_Long	415.9	False	_Long	Oddball
15	7403	shorter	True_Short	458.3	False_Long	740.3	True	_Short	Oddball
15	2287	longer	False_Short	633.3	True_Short	228.7	False	_Short	Oddball
15	2766	shorter	True_Long	325	False_Short	276.6	True	_Long	Oddball
15	3978	shorter	True_Long	441.6	True_Long	397.8	True	_Long	Oddball
15	4197	shorter	True_Long	408.3	True_Long	419.7	True	_Long	Oddball
15	2410	shorter	False_Long	400	True_Long	241	False	_Long	Oddball
15	5467	shorter	False_Short	500	False_Long	546.7	False	_Short	Oddball
16	17515	shorter	False_Short	475	True_Long	1751.5	False	_Short	Oddball
16	6718	longer	True_Short	625	False_Short	671.8	True	_Short	Oddball
16	13243	shorter	True_Short	408.3	True_Short	1324.3	True	_Short	Oddball
16	13312	shorter	False_Short	483.3	True_Short	1331.2	False	_Short	Oddball
16	3831	longer	False_Long	525	False_Short	383.1	False	_Long	Oddball
16	6593	shorter	False_Long	458.3	False_Long	659.3	False	_Long	Oddball
16	11512	longer	True_Long	391.6	False_Long	1151.2	True	_Long	Oddball
16	2127	longer	True_Long	658.3	True_Long	212.7	True	_Long	Oddball
16	27401	shorter	True_Short	591.6	True_Long	2740.1	True	_Short	Oddball
16	7783	longer	True_Short	491.6	True_Short	778.3	True	_Short	Oddball
16	10415	shorter	True_Long	391.6	True_Short	1041.5	True	_Long	Oddball
16	10884	shorter	True_Long	333.3	True_Long	1088.4	True	_Long	Oddball
16	6834	longer	False_Short	625	True_Long	683.4	False	_Short	Oddball
16	2865	longer	True_Short	625	False_Short	286.5	True	_Short	Oddball
16	4217	longer	True_Long	483.3	True_Short	421.7	True	_Long	Oddball
16	10118	longer	True_Short	616.7	True_Long	1011.8	True	_Short	Oddball
16	7360	shorter	True_Long	433.3	True_Short	736	True	_Long	Oddball
16	15727	shorter	True_Short	533.3	True_Long	1572.7	True	_Short	Oddball
16	11075	shorter	True_Long	408.3	True_Short	1107.5	True	_Long	Oddball
16	4913	longer	True_Long	641.7	True_Long	491.3	True	_Long	Oddball
16	8722	shorter	True_Long	533.3	True_Long	872.2	True	_Long	Oddball
16	16764	shorter	False_Long	575	True_Long	1676.4	False	_Long	Oddball
16	7217	shorter	True_Short	375	False_Long	721.7	True	_Short	Oddball
16	1394	shorter	True_Short	625	True_Short	139.4	True	_Short	Oddball
16	12919	shorter	False_Short	441.6	True_Short	1291.9	False	_Short	Oddball
16	2661	longer	False_Long	500	False_Short	266.1	False	_Long	Oddball
16	9600	shorter	False_Long	333.3	False_Long	960	False	_Long	Oddball
16	6355	longer	True_Long	500	False_Long	635.5	True	_Long	Oddball
16	11507	longer	True_Long	633.3	True_Long	1150.7	True	_Long	Oddball
16	10620	shorter	True_Short	650	True_Long	1062	True	_Short	Oddball
16	10831	shorter	True_Short	400	True_Short	1083.1	True	_Short	Oddball
16	8058	shorter	False_Short	408.3	False_Long	805.8	False	_Short	Oddball
16	8272	shorter	True_Short	450	False_Short	827.2	True	_Short	Oddball
16	10641	shorter	True_Long	600	True_Short	1064.1	True	_Long	Oddball
16	372	longer	True_Long	558.3	True_Long	37.2	True	_Long	Oddball
16	1297	shorter	False_Short	641.7	True_Long	129.7	False	_Short	Oddball
16	11695	longer	True_Short	666.7	False_Short	1169.5	True	_Short	Oddball
16	1888	longer	True_Short	533.3	True_Short	188.8	True	_Short	Oddball
16	291	shorter	True_Long	358.3	True_Short	29.1	True	_Long	Oddball
16	17709	shorter	True_Short	416.6	True_Long	1770.9	True	_Short	Oddball
16	1437	longer	True_Long	658.3	True_Short	143.7	True	_Long	Oddball
[truncated: 5,511 more rows]
